# Supplementary material
Source: PubMed Central journal article supplement (PMC5107356)
Supplement: NIHMS787012-supplement-supplement_1.pdf [file NIHMS787012-supplement-supplement_1.pdf]

Table S1

| <b>Gene name</b> | <b>UniProt ID</b> | <b>Uniprot description</b>                                               | <b>Normalized PCMC spectral counts (avg.)</b> | <b>Normalized BMCMC spectral counts (avg.)</b> |
|------------------|-------------------|--------------------------------------------------------------------------|-----------------------------------------------|------------------------------------------------|
| Mcpt4            | MCPT4_MOUSE       | Mast cell protease 4 (mMCP-4)                                            | 62.34                                         | 0.81                                           |
| Ahnak            | E9Q616_MOUSE      | Protein Ahnak                                                            | 20.38                                         | 0.81                                           |
| Flna             | FLNA_MOUSE        | Filamin-A                                                                | 19.54                                         | 0                                              |
| Mcpt1            | Q496V0_MOUSE      | Mast cell protease 1                                                     | 15.14                                         | 0                                              |
| Aoah             | AOAH_MOUSE        | Acyloxyacyl hydrolase                                                    | 12.82                                         | 0.4                                            |
| Cpq              | CBPQ_MOUSE        | Carboxypeptidase Q                                                       | 12.66                                         | 0                                              |
| Galc             | GALC_MOUSE        | Galactocerebrosidase                                                     | 12.27                                         | 0.28                                           |
| Ecm1             | ECM1_MOUSE        | Extracellular matrix protein 1                                           | 12.17                                         | 0                                              |
| Ddah2            | DDAH2_MOUSE       | N(G),N(G)-dimethylarginine dimethylaminohydrolase 2                      | 8.65                                          | 0.81                                           |
| Paps2            | PAPS2_MOUSE       | Bifunctional 3'-phosphoadenosine 5'-phosphosulfate synthase 2            | 8.64                                          | 0                                              |
| Lap3             | AMPL_MOUSE        | Cytosol aminopeptidase                                                   | 8.56                                          | 0                                              |
| Syng1            | SNG1_MOUSE        | Synaptogyrin-1                                                           | 7.53                                          | 0.81                                           |
| Ckb              | KCRB_MOUSE        | Creatine kinase B-type                                                   | 7.06                                          | 0                                              |
| Aars             | SYA_MOUSE         | Alanine--tRNA ligase, cytoplasmic                                        | 6.45                                          | 0.13                                           |
| Rbp1             | Q58EU7_MOUSE      | Rbp1 protein                                                             | 6.38                                          | 0                                              |
| Ide              | IDE_MOUSE         | Insulin-degrading enzyme                                                 | 6.19                                          | 0.27                                           |
| Kv2a7            | KV2A7_MOUSE       | Ig kappa chain V-II region 26-10                                         | 5.89                                          | 0.67                                           |
| Ptprg            | PTPRG_MOUSE       | Receptor-type tyrosine-protein phosphatase gamma                         | 5.6                                           | 0                                              |
| Prkar2b          | KAP3_MOUSE        | cAMP-dependent protein kinase type II-beta regulatory subunit            | 5.5                                           | 0.14                                           |
| Pacsin2          | Q3TDA7_MOUSE      | Protein kinase C and casein kinase substrate in neurons 2, isoform CRA_a | 5.04                                          | 0.68                                           |

|          |              |                                                                   |      |      |
|----------|--------------|-------------------------------------------------------------------|------|------|
| Sdf4     | CAB45_MOUSE  | 45 kDa calcium-binding protein                                    | 5.03 | 0    |
| Mcpt4    | Q3UN88_MOUSE | Mast cell protease 4                                              | 4.79 | 0    |
| Scpep1   | RISC_MOUSE   | Retinoid-inducible serine carboxypeptidase                        | 4.76 | 0    |
| Aga      | A2RSS6_MOUSE | Aspartylglucosaminidase                                           | 4.71 | 0.41 |
| Sars     | SYSC_MOUSE   | Serine--tRNA ligase, cytoplasmic                                  | 4.53 | 0.81 |
| Igh-6    | IGHM_MOUSE   | Ig mu chain C region secreted form                                | 4.51 | 0.13 |
| Ap2b1    | AP2B1_MOUSE  | AP-2 complex subunit beta                                         | 4.48 | 0.8  |
| Dync1h1  | DYHC1_MOUSE  | Cytoplasmic dynein 1 heavy chain 1                                | 4.46 | 0.81 |
| Emp3     | EMP3_MOUSE   | Epithelial membrane protein 3                                     | 4.44 | 0    |
| Pgk2     | PGK2_MOUSE   | Phosphoglycerate kinase 2                                         | 4.22 | 0.52 |
| Myo1c    | MYO1C_MOUSE  | Unconventional myosin-Ic                                          | 3.96 | 0.8  |
| Map4     | MAP4_MOUSE   | Microtubule-associated protein 4                                  | 3.93 | 0.14 |
| Slc38a7  | S38A7_MOUSE  | Putative sodium-coupled neutral amino acid transporter 7          | 3.92 | 0.4  |
| Serbp1   | PAIRB_MOUSE  | Plasminogen activator inhibitor 1 RNA-binding protein             | 3.92 | 0.82 |
| Camk2d   | KCC2D_MOUSE  | Calcium/calmodulin-dependent protein kinase type II subunit delta | 3.9  | 0    |
| Cd44     | CD44_MOUSE   | CD44 antigen                                                      | 3.85 | 0.81 |
| Pros1    | Q3TR66_MOUSE | Protein S (Alpha)                                                 | 3.85 | 0    |
| Epdr1    | EPDR1_MOUSE  | Mammalian ependymin-related protein 1                             | 3.67 | 0    |
| Fdps     | Q4FJN9_MOUSE | Fdps protein                                                      | 3.63 | 0.81 |
| Serp1b1b | ILEUB_MOUSE  | Leukocyte elastase inhibitor B                                    | 3.55 | 0.68 |
| Ddx39b   | DX39B_MOUSE  | Spliceosome RNA helicase Ddx39b                                   | 3.37 | 0    |
| Cth      | CGL_MOUSE    | Cystathionine gamma-lyase                                         | 3.34 | 0    |
| Ufd1l    | UFD1_MOUSE   | Ubiquitin fusion degradation protein 1 homolog                    | 3.34 | 0    |

|         |              |                                                                              |      |      |
|---------|--------------|------------------------------------------------------------------------------|------|------|
| Lipa    | LICH_MOUSE   | Lysosomal acid lipase/cholesteryl ester hydrolase                            | 3.34 | 0.4  |
| Ncam1   | NCAM1_MOUSE  | Neural cell adhesion molecule 1                                              | 3.32 | 0    |
| Ca8     | A2AKP8_MOUSE | Carbonic anhydrase-related protein                                           | 3.08 | 0    |
| Hnrnpa0 | ROA0_MOUSE   | Heterogeneous nuclear ribonucleoprotein A0                                   | 3.07 | 0    |
| Aimp1   | AIMP1_MOUSE  | Aminoacyl tRNA synthase complex-interacting multifunctional protein 1        | 3.07 | 0    |
| Eif5b   | IF2P_MOUSE   | Eukaryotic translation initiation factor 5B                                  | 3.07 | 0.13 |
| Psat1   | Q543K5_MOUSE | Phosphoserine aminotransferase                                               | 3.05 | 0    |
| Gars    | SYG_MOUSE    | Glycine--tRNA ligase                                                         | 3.04 | 0.27 |
| Lrp1    | LRP1_MOUSE   | Prolow-density lipoprotein receptor-related protein 1                        | 3.03 | 0.68 |
| Csf2    | Q5SX78_MOUSE | Colony stimulating factor 2 (Granulocyte-macrophage)                         | 2.84 | 0.14 |
| Rrbp1   | RRBP1_MOUSE  | Ribosome-binding protein 1                                                   | 2.84 | 0.13 |
| Akap2   | AKAP2_MOUSE  | A-kinase anchor protein 2                                                    | 2.81 | 0    |
| Ehd4    | Q3TM70_MOUSE | EH-domain containing 4                                                       | 2.81 | 0    |
| Slc1a4  | Q3UTP8_MOUSE | Solute carrier family 1 (Glutamate/neutral amino acid transporter), member 4 | 2.8  | 0    |
| Pdap1   | B2RTB0_MOUSE | MCG17262                                                                     | 2.8  | 0.14 |
| Adh7    | Q9D748_MOUSE | Alcohol dehydrogenase 7 (Class IV), mu or sigma polypeptide                  | 2.79 | 0.67 |
| Slc12a4 | Q3TWZ6_MOUSE | Solute carrier family 12, member 4                                           | 2.79 | 0.67 |
| Plxnd1  | PLXD1_MOUSE  | Plexin-D1                                                                    | 2.79 | 0.13 |
| Nid1    | NID1_MOUSE   | Nidogen-1                                                                    | 2.79 | 0    |
| Ptbp1   | PTBP1_MOUSE  | Polypyrimidine tract-binding protein 1                                       | 2.78 | 0.4  |
| Acly    | A2A4H2_MOUSE | ATP-citrate synthase                                                         | 2.77 | 0    |
| Gc      | VTDB_MOUSE   | Vitamin D-binding protein                                                    | 2.75 | 0.54 |

|          |              |                                                                            |      |      |
|----------|--------------|----------------------------------------------------------------------------|------|------|
| Cdv3     | CDV3_MOUSE   | Protein CDV3                                                               | 2.52 | 0.81 |
| Tmprss3  | TMPS3_MOUSE  | Transmembrane protease serine 3                                            | 2.52 | 0    |
| Hspa9    | GRP75_MOUSE  | Stress-70 protein, mitochondrial                                           | 2.47 | 0.81 |
| Arhgap18 | RHG18_MOUSE  | Rho GTPase-activating protein 18                                           | 2.47 | 0.14 |
| Man1a    | Q544T7_MOUSE | Mannosidase 1, alpha, isoform CRA_a                                        | 2.29 | 0.13 |
| Hnrnp1   | Q811L7_MOUSE | Heterogeneous nuclear ribonucleoprotein H1                                 | 2.25 | 0.14 |
| Dars     | SYDC_MOUSE   | Aspartate--tRNA ligase, cytoplasmic                                        | 2.25 | 0    |
| Eprs     | SYEP_MOUSE   | Bifunctional glutamate/proline--tRNA ligase                                | 2.23 | 0.4  |
| Mcpt3    | MCPT3_MOUSE  | Mast cell protease 3                                                       | 2.22 | 0    |
| Psmc3    | PRS6A_MOUSE  | 26S protease regulatory subunit 6A                                         | 2.22 | 0.13 |
| Kv3a7    | KV3A7_MOUSE  | Ig kappa chain V-III region TEPC 124                                       | 2.21 | 0.54 |
| Tsnax    | TSNAX_MOUSE  | Translin-associated protein X                                              | 2.2  | 0.52 |
| Arg1     | ARGI1_MOUSE  | Arginase-1                                                                 | 1.98 | 0    |
| Elmo1    | ELMO1_MOUSE  | Engulfment and cell motility protein 1                                     | 1.97 | 0.25 |
| Numa1    | E9Q7G0_MOUSE | Protein Numa1                                                              | 1.97 | 0.39 |
| Uba2     | A2BH28_MOUSE | SUMO-activating enzyme subunit 2                                           | 1.95 | 0    |
| Ipo5     | IPO5_MOUSE   | Importin-5                                                                 | 1.95 | 0    |
| Fus      | Q564D0_MOUSE | Fusion, derived from t(12;16) malignant liposarcoma (Human), isoform CRA_a | 1.95 | 0    |
| Iah1     | IAH1_MOUSE   | Isoamyl acetate-hydrolyzing esterase 1 homolog                             | 1.93 | 0.26 |
| Ldhb     | LDHB_MOUSE   | L-lactate dehydrogenase B chain                                            | 1.9  | 0.55 |
| Ppp1r14b | PP14B_MOUSE  | Protein phosphatase 1 regulatory subunit 14B                               | 1.71 | 0    |
| Smpd1    | ASM_MOUSE    | Sphingomyelin phosphodiesterase                                            | 1.7  | 0    |
| Gm14192  | B1AQ88_MOUSE | Protein Gm14192                                                            | 1.67 | 0.26 |
| Hnrnpf   | HNRPF_MOUSE  | Heterogeneous nuclear                                                      | 1.67 | 0.67 |

|         |              |                                                 |      |      |
|---------|--------------|-------------------------------------------------|------|------|
|         |              | ribonucleoprotein F                             |      |      |
| Rps21   | A2ABW8_MOUSE | 40S ribosomal protein S21                       | 1.66 | 0.27 |
| Atp6v0c | VATL_MOUSE   | V-type proton ATPase 16 kDa proteolipid subunit | 1.66 | 0.81 |

Table S2

| <b>Gene name</b> | <b>UniProt ID</b> | <b>Uniprot description</b>                              | <b>Normalized PCMC spectral counts (avg.)</b> | <b>Normalized BMCMC spectral counts (avg.)</b> |
|------------------|-------------------|---------------------------------------------------------|-----------------------------------------------|------------------------------------------------|
| Scin             | ADSV_MOUSE        | Adseverin                                               | 0.26                                          | 66.88                                          |
| Mcpt8            | Q3UWB6_MOUSE      | Mast cell protease 8                                    | 0                                             | 41.26                                          |
| Akr1c18          | Q3U538_MOUSE      | Aldo-keto reductase family 1, member C18, isoform CRA_a | 0                                             | 33.53                                          |
| Napsa            | Q3U7H1_MOUSE      | Putative uncharacterized protein                        | 0                                             | 29.36                                          |
| Jak1             | JAK1_MOUSE        | Tyrosine-protein kinase JAK1                            | 0.82                                          | 22.41                                          |
| F13a1            | F13A_MOUSE        | Coagulation factor XIII A chain                         | 0                                             | 21.94                                          |
| Hist1h2af        | H2A1F_MOUSE       | Histone H2A type 1-F                                    | 0.26                                          | 21.19                                          |
| Il4ra            | Q3U905_MOUSE      | Interleukin 4 receptor, alpha                           | 0.26                                          | 19.09                                          |
| Hist1h2bb        | H2B1B_MOUSE       | Histone H2B type 1-B                                    | 0                                             | 19                                             |
| Ifitm1           | IFM1_MOUSE        | Interferon-induced transmembrane protein 1              | 0                                             | 18.63                                          |
| Anxa2            | Q542G9_MOUSE      | Annexin                                                 | 0.27                                          | 18.36                                          |
| Stat5a           | Q9JIA0_MOUSE      | Signal transducer and activator of transcription 5A     | 0                                             | 17.14                                          |
| Ccl6             | SY06_MOUSE        | C-C motif chemokine 6                                   | 0                                             | 16.35                                          |
| Upp1             | UPP1_MOUSE        | Uridine phosphorylase 1                                 | 0                                             | 14.67                                          |
| Ctsg             | Q059V7_MOUSE      | Cathepsin G                                             | 0.58                                          | 14.66                                          |
| Myo1g            | MYO1G_MOUSE       | Unconventional myosin-Ig                                | 0                                             | 12.29                                          |
| Tgfbr1           | Q4FJL1_MOUSE      | Tgfbr1 protein                                          | 0.86                                          | 11.64                                          |
| Atp6v0a1         | VPP1_MOUSE        | V-type proton ATPase 116 kDa subunit a isoform 1        | 0.58                                          | 11.15                                          |
| Tmem59           | TMM59_MOUSE       | Transmembrane protein 59                                | 0.56                                          | 10.64                                          |
| Aldh9a1          | AL9A1_MOUSE       | 4-trimethylaminobutyraldehyde dehydrogenase             | 0.58                                          | 10.11                                          |
| Lrp12            | LRP12_MOUSE       | Low-density lipoprotein receptor-related protein 12     | 0.29                                          | 10.01                                          |
| Vamp7            | VAMP7_MOUSE       | Vesicle-associated membrane protein 7                   | 0.29                                          | 9.86                                           |
| Nov              | NOV_MOUSE         | Protein NOV homolog                                     | 0                                             | 9.71                                           |
| Fcgr2            | FCGR2_MOUSE       | Low affinity immunoglobulin gamma Fc region receptor II | 0.58                                          | 9.3                                            |
| Prep             | Q543B9_MOUSE      | Prolyl endopeptidase                                    | 0.85                                          | 9.17                                           |

|          |              |                                                                     |      |      |
|----------|--------------|---------------------------------------------------------------------|------|------|
| Muc13    | Q3V1S6_MOUSE | Mucin 13, epithelial transmembrane, isoform CRA_a                   | 0    | 9.14 |
| Notch2   | NOTC2_MOUSE  | Neurogenic locus notch homolog protein 2                            | 0.29 | 8.95 |
| Tgfbr2   | Q543C0_MOUSE | Transforming growth factor, beta receptor II, isoform CRA_b         | 0    | 8.53 |
| Cycs     | Q56A15_MOUSE | Cytochrome c                                                        | 0.58 | 8.5  |
| Slc2a3   | Q3TPL8_MOUSE | Solute carrier family 2 (Facilitated glucose transporter), member 3 | 0    | 7.97 |
| Gnai3    | GNAI3_MOUSE  | Guanine nucleotide-binding protein G(k) subunit alpha               | 0    | 7.94 |
| F2r      | PAR1_MOUSE   | Proteinase-activated receptor 1                                     | 0.29 | 7.67 |
| Fcer1g   | FCERG_MOUSE  | High affinity immunoglobulin epsilon receptor subunit gamma         | 0    | 7.58 |
| Tgm1     | TGM1_MOUSE   | Protein-glutamine gamma-glutamyltransferase K                       | 0    | 7.55 |
| Rab2a    | Q0PD65_MOUSE | RAB2, member RAS oncogene family                                    | 0.58 | 7.44 |
| Il6      | A2RTD1_MOUSE | Interleukin 6                                                       | 0    | 7.44 |
| Hvcn1    | HVCN1_MOUSE  | Voltage-gated hydrogen channel 1                                    | 0    | 7.42 |
| Sema4d   | SEM4D_MOUSE  | Semaphorin-4D                                                       | 0.82 | 7.3  |
| Cs       | CISY_MOUSE   | Citrate synthase, mitochondrial                                     | 0    | 7.15 |
| Mpo      | PERM_MOUSE   | Myeloperoxidase                                                     | 0    | 7.12 |
| Manf     | MANF_MOUSE   | Mesencephalic astrocyte-derived neurotrophic factor                 | 0.82 | 6.86 |
| Pepd     | A2RS23_MOUSE | Peptidase D                                                         | 0.29 | 6.63 |
| Gstp1    | GSTP1_MOUSE  | Glutathione S-transferase P 1                                       | 0.26 | 6.62 |
| Grhpr    | Q3T9Z2_MOUSE | Glyoxylate reductase/hydroxypyruvate reductase                      | 0    | 6.62 |
| Ifitm3   | IFM3_MOUSE   | Interferon-induced transmembrane protein 3                          | 0    | 6.35 |
| Atp6v1b2 | VAB2_MOUSE   | V-type proton ATPase subunit B, brain isoform                       | 0    | 6.34 |
| Ptptra   | PTPRA_MOUSE  | Receptor-type tyrosine-protein phosphatase alpha                    | 0    | 6.34 |
| Il2rg    | Q3UPA9_MOUSE | Interleukin 2 receptor, gamma chain, isoform CRA_b                  | 0.55 | 6.29 |

|         |              |                                                                     |      |      |
|---------|--------------|---------------------------------------------------------------------|------|------|
| Sema4b  | SEM4B_MOUSE  | Semaphorin-4B                                                       | 0.56 | 6.22 |
| Ccl3    | Q5QNW0_MOUSE | Chemokine (C-C motif)<br>ligand 3                                   | 0    | 6.2  |
| Ran     | RAN_MOUSE    | GTP-binding nuclear protein<br>Ran                                  | 0.27 | 6.19 |
| Prkar1a | A2AI68_MOUSE | cAMP-dependent protein<br>kinase type I-alpha<br>regulatory subunit | 0.56 | 6.07 |
| Abcc1   | A5D6P3_MOUSE | ATP-binding cassette, sub-<br>family C (CFTR/MRP),<br>member 1      | 0    | 5.93 |
| Atp8a1  | AT8A1_MOUSE  | Probable phospholipid-<br>transporting ATPase IA                    | 0.26 | 5.92 |
| Ctsl    | Q543M3_MOUSE | Cathepsin L                                                         | 0.26 | 5.92 |
| Lgmn    | A2RTI3_MOUSE | Legumain                                                            | 0    | 5.79 |
| Rab38   | Q5FW76_MOUSE | RAB38, member of RAS<br>oncogene family                             | 0    | 5.79 |
| Capn5   | Q3TPL4_MOUSE | Putative uncharacterized<br>protein                                 | 0.26 | 5.68 |
| Igfbp5  | Q3UQV0_MOUSE | Insulin-like growth factor<br>binding protein 5, isoform<br>CRA_a   | 0    | 5.67 |
| Glpr2   | B1AWD5_MOUSE | Golgi-associated plant<br>pathogenesis-related protein<br>1         | 0    | 5.65 |
| Tmem9   | TME9_MOUSE   | Transmembrane protein 9                                             | 0.29 | 5.54 |
| Myl12b  | ML12B_MOUSE  | Myosin regulatory light<br>chain 12B                                | 0    | 5.54 |
| Entpd1  | Q544U5_MOUSE | Putative uncharacterized<br>protein                                 | 0    | 5.53 |
| Crisp1  | Q545H0_MOUSE | MCG21094                                                            | 0    | 5.53 |
| Ccl4    | Q5QNV9_MOUSE | Chemokine (C-C motif)<br>ligand 4                                   | 0    | 5.37 |
| Wwp2    | WWP2_MOUSE   | NEDD4-like E3 ubiquitin-<br>protein ligase WWP2                     | 0    | 5.27 |
| Cd34    | Q543B6_MOUSE | CD34 antigen, isoform<br>CRA_b                                      | 0    | 5.26 |
| Avil    | AVIL_MOUSE   | Advillin                                                            | 0    | 5.16 |
| Rab21   | Q0PD35_MOUSE | RAB21, member RAS<br>oncogene family                                | 0.58 | 5.15 |
| Ptprj   | PTPRJ_MOUSE  | Receptor-type tyrosine-<br>protein phosphatase eta                  | 0.26 | 5.13 |
| Snx3    | SNX3_MOUSE   | Sorting nexin-3                                                     | 0    | 5.13 |
| Lmna    | B3RH23_MOUSE | Lamin A                                                             | 0    | 5.12 |
| Tmem55a | A2AP25_MOUSE | Transmembrane protein 55A                                           | 0.86 | 5    |



|           |              |                                                                      |      |      |
|-----------|--------------|----------------------------------------------------------------------|------|------|
| Sell      | Q3UV83_MOUSE | L-selectin                                                           | 0    | 4.99 |
| Qsox1     | QSOX1_MOUSE  | Sulfhydryl oxidase 1                                                 | 0.85 | 4.99 |
| Acadl     | ACADL_MOUSE  | Long-chain specific acyl-CoA dehydrogenase, mitochondrial            | 0    | 4.87 |
| Rps4x     | Q545X8_MOUSE | MCG116623                                                            | 0.79 | 4.85 |
| C1qbp     | C1QBP_MOUSE  | Complement component 1 Q subcomponent-binding protein, mitochondrial | 0    | 4.84 |
| Rab1      | Q0PD67_MOUSE | RAB1, member RAS oncogene family, isoform CRA_a                      | 0.27 | 4.74 |
| Hgf       | HGF_MOUSE    | Hepatocyte growth factor                                             | 0    | 4.73 |
| Cr1l      | CR1L_MOUSE   | Complement component receptor 1-like protein                         | 0.29 | 4.72 |
| Hist2h2ab | H2A2B_MOUSE  | Histone H2A type 2-B                                                 | 0    | 4.72 |
| Ccl9      | Q3U9T8_MOUSE | Ccl9 protein                                                         | 0    | 4.71 |
| Gmpr      | GMPR1_MOUSE  | GMP reductase 1                                                      | 0    | 4.71 |
| Scamp2    | Q3TAL2_MOUSE | Secretory carrier membrane protein 2                                 | 0.58 | 4.71 |
| Gng12     | GBG12_MOUSE  | Guanine nucleotide-binding protein G(I)/G(S)/G(O) subunit gamma-12   | 0    | 4.59 |
| Zdhhc20   | ZDH20_MOUSE  | Probable palmitoyltransferase ZDHHC20                                | 0    | 4.46 |
| Rab11a    | Q0PD45_MOUSE | RAB11a, member RAS oncogene family                                   | 0    | 4.45 |
| Thbs1     | TSP1_MOUSE   | Thrombospondin-1                                                     | 0    | 4.45 |
| Itch      | A2AVS0_MOUSE | E3 ubiquitin-protein ligase Itchy                                    | 0    | 4.45 |
| Cd300a    | CLM8_MOUSE   | CMRF35-like molecule 8                                               | 0    | 4.45 |
| Atp5a1    | ATPA_MOUSE   | ATP synthase subunit alpha, mitochondrial                            | 0.81 | 4.44 |
| Hist1h1c  | Q5SZA3_MOUSE | Histone cluster 1, H1c                                               | 0.55 | 4.44 |
| Tyropb    | TYBP_MOUSE   | TYRO protein tyrosine kinase-binding protein                         | 0    | 4.43 |
| Cd9       | CD9_MOUSE    | CD9 antigen                                                          | 0    | 4.33 |
| Pcbp1     | PCBP1_MOUSE  | Poly(rC)-binding protein 1                                           | 0    | 4.32 |
| Itgb7     | ITB7_MOUSE   | Integrin beta-7                                                      | 0    | 4.2  |
| Atp2a3    | AT2A3_MOUSE  | Sarcoplasmic/endoplasmic reticulum calcium ATPase 3                  | 0    | 4.19 |
| Alox5     | LOX5_MOUSE   | Arachidonate 5-lipoxygenase                                          | 0.29 | 4.19 |
| Cd84      | SLAF5_MOUSE  | SLAM family member 5                                                 | 0    | 4.19 |
| Prnp      | Q4FIQ7_MOUSE | Major prion protein                                                  | 0    | 4.18 |

|         |              |                                                                   |      |      |
|---------|--------------|-------------------------------------------------------------------|------|------|
| Atp13a3 | AT133_MOUSE  | Probable cation-transporting ATPase 13A3                          | 0    | 4.17 |
| Hibadh  | 3HIDH_MOUSE  | 3-hydroxyisobutyrate dehydrogenase, mitochondrial                 | 0.29 | 4.17 |
| H2afv   | B2RVP5_MOUSE | Histone H2A                                                       | 0.56 | 4.07 |
| Slc2a1  | GTR1_MOUSE   | Solute carrier family 2, facilitated glucose transporter member 1 | 0.29 | 4.06 |
| Sub1    | TCP4_MOUSE   | Activated RNA polymerase II transcriptional coactivator p15       | 0    | 4.04 |
| Cct4    | Q564F4_MOUSE | T-complex protein 1 subunit delta                                 | 0    | 4.03 |
| Spred1  | SPRE1_MOUSE  | Sprouty-related, EVH1 domain-containing protein 1                 | 0    | 4.02 |
| Ndfip1  | NFIP1_MOUSE  | NEDD4 family-interacting protein 1                                | 0    | 3.93 |
| Gnpda2  | GNPI2_MOUSE  | Glucosamine-6-phosphate isomerase 2                               | 0    | 3.93 |
| Ndfip2  | NFIP2_MOUSE  | NEDD4 family-interacting protein 2                                | 0    | 3.92 |
| Akr1c21 | AK1CL_MOUSE  | Aldo-keto reductase family 1 member C21                           | 0    | 3.92 |
| Cct2    | Q542X7_MOUSE | Chaperonin subunit 2 (Beta), isoform CRA_a                        | 0    | 3.91 |
| Cyb5    | Q544Z9_MOUSE | Cytochrome b-5, isoform CRA_d                                     | 0.29 | 3.91 |
| B2m     | B2MG_MOUSE   | Beta-2-microglobulin                                              | 0    | 3.91 |
| Akr1c12 | Q91X42_MOUSE | Aldo-keto reductase family 1, member C12                          | 0    | 3.89 |
| Stx12   | A2ADS0_MOUSE | Syntaxin-12                                                       | 0    | 3.89 |
| Cyfip2  | CYFP2_MOUSE  | Cytoplasmic FMR1-interacting protein 2                            | 0.26 | 3.82 |
| Gpr128  | GP128_MOUSE  | Probable G-protein coupled receptor 128                           | 0.58 | 3.79 |
| Acat1   | THIL_MOUSE   | Acetyl-CoA acetyltransferase, mitochondrial                       | 0    | 3.78 |
| Adam8   | Q3U1J7_MOUSE | A disintegrin and metallopeptidase domain 8, isoform CRA_c        | 0    | 3.78 |
| Tecpr1  | TCPR1_MOUSE  | Tectonin beta-propeller repeat-containing protein 1               | 0.29 | 3.78 |
| Nckap11 | Q3UDY0_MOUSE | Putative uncharacterized protein                                  | 0    | 3.76 |

|           |              |                                                                                          |      |      |
|-----------|--------------|------------------------------------------------------------------------------------------|------|------|
| Tcp1      | TCP2_MOUSE   | T-complex protein 1 subunit alpha                                                        | 0.29 | 3.75 |
| Acvr1b    | Q3TZF1_MOUSE | Activin A receptor, type 1B                                                              | 0    | 3.67 |
| H2afy2    | H2AW_MOUSE   | Core histone macro-H2A.2                                                                 | 0    | 3.67 |
| H2-T23    | Q3V014_MOUSE | Putative uncharacterized protein                                                         | 0.29 | 3.64 |
| Pmm2      | Q545N8_MOUSE | Phosphomannomutase 2                                                                     | 0    | 3.51 |
| Arpc3     | ARPC3_MOUSE  | Actin-related protein 2/3 complex subunit 3                                              | 0    | 3.5  |
| Rab8a     | Q0PD50_MOUSE | RAB8A, member RAS oncogene family, isoform CRA_a                                         | 0.53 | 3.5  |
| Flot2     | FLOT2_MOUSE  | Flotillin-2                                                                              | 0.29 | 3.39 |
| Tcirg1    | Q91W06_MOUSE | T-cell, immune regulator 1, ATPase, H <sup>+</sup> transporting, lysosomal V0 protein A3 | 0.56 | 3.37 |
| Rab35     | Q3U0T9_MOUSE | RAB35, member RAS oncogene family                                                        | 0.84 | 3.37 |
| Cd300lf   | CLM1_MOUSE   | CMRF35-like molecule 1                                                                   | 0.84 | 3.36 |
| Spp1      | Q547B5_MOUSE | Osteopontin                                                                              | 0    | 3.36 |
| Ppa1      | Q4FK49_MOUSE | Pyp protein                                                                              | 0    | 3.35 |
| Stx8      | Q5F234_MOUSE | Syntaxin-8                                                                               | 0.53 | 3.26 |
| Tceb2     | ELOB_MOUSE   | Transcription elongation factor B polypeptide 2                                          | 0    | 3.25 |
| Suox      | SUOX_MOUSE   | Sulfite oxidase, mitochondrial                                                           | 0    | 3.25 |
| Hist1h2ba | H2B1A_MOUSE  | Histone H2B type 1-A                                                                     | 0    | 3.24 |
| Cd200r3   | MO2R3_MOUSE  | Cell surface glycoprotein CD200 receptor 3                                               | 0    | 3.24 |
| Tpm3      | TPM3_MOUSE   | Tropomyosin alpha-3 chain                                                                | 0.29 | 3.24 |
| Nedd4l    | NED4L_MOUSE  | E3 ubiquitin-protein ligase NEDD4-like                                                   | 0    | 3.24 |
| Cbx3      | CBX3_MOUSE   | Chromobox protein homolog 3                                                              | 0    | 3.23 |
| Slc4a7    | S4A7_MOUSE   | Sodium bicarbonate cotransporter 3                                                       | 0    | 3.23 |
| Relt      | TR19L_MOUSE  | Tumor necrosis factor receptor superfamily member 19L                                    | 0    | 3.22 |
| Acaa1b    | Q3UKM0_MOUSE | MCG21883, isoform CRA_e                                                                  | 0    | 3.21 |
| Atp2a1    | AT2A1_MOUSE  | Sarcoplasmic/endoplasmic reticulum calcium ATPase 1                                      | 0    | 3.13 |
| Hba-a1    | A8DUV3_MOUSE | Alpha-globin                                                                             | 0    | 3.12 |
| Vdac2     | VDAC2_MOUSE  | Voltage-dependent anion-selective channel protein 2                                      | 0    | 3.11 |

|         |              |                                                        |      |      |
|---------|--------------|--------------------------------------------------------|------|------|
| Pygb    | A2AWQ5_MOUSE | Glycogen phosphorylase, brain form                     | 0.84 | 3.1  |
| Rdx     | RADI_MOUSE   | Radixin                                                | 0    | 3.1  |
| Lmbrd1  | LMBD1_MOUSE  | Probable lysosomal cobalamin transporter               | 0.56 | 3.1  |
| Snx12   | SNX12_MOUSE  | Sorting nexin-12                                       | 0    | 3.09 |
| Aifm1   | B1AU24_MOUSE | Apoptosis-inducing factor 1, mitochondrial             | 0    | 3.08 |
| Acaa2   | THIM_MOUSE   | 3-ketoacyl-CoA thiolase, mitochondrial                 | 0    | 3.08 |
| Slc15a4 | S15A4_MOUSE  | Solute carrier family 15 member 4                      | 0.84 | 2.99 |
| Ly6c1   | LY6C1_MOUSE  | Lymphocyte antigen 6C1                                 | 0    | 2.97 |
| Plp2    | Q0VEW4_MOUSE | Proteolipid protein 2                                  | 0.85 | 2.97 |
| Bst2    | BST2_MOUSE   | Bone marrow stromal antigen 2                          | 0    | 2.97 |
| Rpl18a  | RL18A_MOUSE  | 60S ribosomal protein L18a                             | 0.29 | 2.97 |
| Cstb    | CYTB_MOUSE   | Cystatin-B                                             | 0.81 | 2.96 |
| Cadm3   | CADM3_MOUSE  | Cell adhesion molecule 3                               | 0    | 2.95 |
| Adssl1  | Q3UBP0_MOUSE | Adenylosuccinate synthetase isozyme 1                  | 0    | 2.94 |
| Capn2   | CAN2_MOUSE   | Calpain-2 catalytic subunit                            | 0.29 | 2.93 |
| Rps24   | Q5M9M7_MOUSE | 40S ribosomal protein S24                              | 0    | 2.85 |
| Jak1    | B1ASP2_MOUSE | Tyrosine-protein kinase                                | 0    | 2.85 |
| Sumo2   | SUMO2_MOUSE  | Small ubiquitin-related modifier 2                     | 0    | 2.84 |
| Gmppb   | GMPPB_MOUSE  | Mannose-1-phosphate guanyltransferase beta             | 0.27 | 2.83 |
| Cct3    | Q3U4U6_MOUSE | Chaperonin containing Tcp1, subunit 3 (Gamma)          | 0.29 | 2.83 |
| Abcg1   | Q0VDW9_MOUSE | ATP-binding cassette, sub-family G (WHITE), member 1   | 0    | 2.83 |
| Lcp2    | LCP2_MOUSE   | Lymphocyte cytosolic protein 2                         | 0    | 2.82 |
| Aldoc   | B1AQE0_MOUSE | Fructose-bisphosphate aldolase C                       | 0    | 2.82 |
| S100a11 | S10AB_MOUSE  | Protein S100-A11                                       | 0.52 | 2.7  |
| Rap2b   | Q6ZWR0_MOUSE | MCG5466                                                | 0    | 2.7  |
| Tfrc    | Q542D9_MOUSE | Transferrin receptor, isoform CRA_a                    | 0    | 2.7  |
| Vps28   | VPS28_MOUSE  | Vacuolar protein sorting-associated protein 28 homolog | 0.81 | 2.7  |
| Nif3l1  | NIF3L_MOUSE  | NIF3-like protein 1                                    | 0.56 | 2.7  |

|         |              |                                                                          |      |      |
|---------|--------------|--------------------------------------------------------------------------|------|------|
| Vps35   | VP35_MOUSE   | Vacuolar protein sorting-associated protein 35                           | 0    | 2.69 |
| Aldh1l1 | AL1L1_MOUSE  | Cytosolic 10-formyltetrahydrofolate dehydrogenase                        | 0.84 | 2.69 |
| Pa2g4   | Q3TGU7_MOUSE | Proliferation-associated 2G4                                             | 0.26 | 2.69 |
| Rpl27   | Q5BLJ9_MOUSE | 60S ribosomal protein L27                                                | 0    | 2.68 |
| Rpn2    | RPN2_MOUSE   | Dolichyl-diphosphooligosaccharide--protein glycosyltransferase subunit 2 | 0    | 2.67 |
| Q61872  | Q61872_MOUSE | Envelope protein                                                         | 0    | 2.57 |
| Rab9    | Q0PD48_MOUSE | MCG116026, isoform CRA_a                                                 | 0    | 2.57 |
| Prkaca  | KAPCA_MOUSE  | cAMP-dependent protein kinase catalytic subunit alpha                    | 0.85 | 2.56 |
| Rpn1    | RPN1_MOUSE   | Dolichyl-diphosphooligosaccharide--protein glycosyltransferase subunit 1 | 0    | 2.56 |
| Eci1    | ECI1_MOUSE   | Enoyl-CoA delta isomerase 1, mitochondrial                               | 0    | 2.56 |
| Mlec    | MLEC_MOUSE   | Malectin                                                                 | 0    | 2.56 |
| Csrp1   | Q4FJX4_MOUSE | Csrp1 protein                                                            | 0.58 | 2.55 |
| Cd151   | CD151_MOUSE  | CD151 antigen                                                            | 0    | 2.55 |
| Sidt2   | Q3U1L8_MOUSE | Putative uncharacterized protein                                         | 0    | 2.55 |
| Vdac1   | VDAC1_MOUSE  | Voltage-dependent anion-selective channel protein 1                      | 0.29 | 2.55 |
| Fut8    | FUT8_MOUSE   | Alpha-(1,6)-fucosyltransferase                                           | 0.82 | 2.55 |
| Rbmx    | RBMX_MOUSE   | RNA-binding motif protein, X chromosome                                  | 0.56 | 2.54 |
| Rap1b   | Q52L50_MOUSE | RAS related protein 1b                                                   | 0    | 2.44 |
| Cmip    | CMIP_MOUSE   | C-Maf-inducing protein                                                   | 0    | 2.44 |
| Slpi    | Q548X8_MOUSE | Secretory leukocyte peptidase inhibitor, isoform CRA_a                   | 0    | 2.44 |
| Pabpc1  | PABP1_MOUSE  | Polyadenylate-binding protein 1                                          | 0    | 2.44 |
| Rap2a   | RAP2A_MOUSE  | Ras-related protein Rap-2a                                               | 0    | 2.43 |
| Srm     | Q543H0_MOUSE | MCG16662                                                                 | 0.27 | 2.43 |
| Maob    | AOFB_MOUSE   | Amine oxidase [flavin-containing] B                                      | 0    | 2.43 |
| Nudc    | A2A9F5_MOUSE | Nuclear migration protein                                                | 0.27 | 2.43 |

|         |              |                                                                   |      |      |
|---------|--------------|-------------------------------------------------------------------|------|------|
|         |              | nudC                                                              |      |      |
| Itpa    | Q60I30_MOUSE | Inosine triphosphatase (Nucleoside triphosphate pyrophosphatase)  | 0.55 | 2.43 |
| Crkl    | A2RS58_MOUSE | V-crk sarcoma virus CT10 oncogene homolog (Avian)-like            | 0    | 2.43 |
| Fbxo6   | FBX6_MOUSE   | F-box only protein 6                                              | 0    | 2.42 |
| Capn1   | Q3TI07_MOUSE | Putative uncharacterized protein                                  | 0.26 | 2.38 |
| Tm9sf2  | Q542E4_MOUSE | Transmembrane 9 superfamily member 2                              | 0    | 2.3  |
| Plcg1   | A2A4A7_MOUSE | 1-phosphatidylinositol 4,5-bisphosphate phosphodiesterase gamma-1 | 0    | 2.29 |
| Rab5b   | B2RPS1_MOUSE | RAB5B, member RAS oncogene family                                 | 0.29 | 2.28 |
| Pls3    | PLST_MOUSE   | Plastin-3                                                         | 0.81 | 2.27 |
| Lamtor1 | LTOR1_MOUSE  | Ragulator complex protein LAMTOR1                                 | 0    | 2.17 |
| H3f3a   | A2A852_MOUSE | Histone H3.3                                                      | 0    | 2.17 |
| C3      | CO3_MOUSE    | Complement C3                                                     | 0    | 2.16 |
| Slc22a3 | Q547K2_MOUSE | SLCA22A3                                                          | 0    | 2.16 |
| Dnaja2  | DNJA2_MOUSE  | DnaJ homolog subfamily A member 2                                 | 0    | 2.16 |
| Evi2b   | EVI2B_MOUSE  | Protein EVI2B                                                     | 0    | 2.16 |
| Rpia    | RPIA_MOUSE   | Ribose-5-phosphate isomerase                                      | 0    | 2.16 |
| Icam2   | B1ARJ1_MOUSE | Intercellular adhesion molecule 2                                 | 0    | 2.16 |
| Lbr     | LBR_MOUSE    | Lamin-B receptor                                                  | 0    | 2.16 |
| Rgs19   | Q78NN4_MOUSE | GAIP/RGS19                                                        | 0    | 2.16 |
| Glud1   | DHE3_MOUSE   | Glutamate dehydrogenase 1, mitochondrial                          | 0.85 | 2.15 |
| Arf4    | Q14BR4_MOUSE | ADP-ribosylation factor 4                                         | 0.82 | 2.15 |
| Arf6    | Q3U0D7_MOUSE | Putative uncharacterized protein                                  | 0.84 | 2.15 |
| S100a4  | Q545V2_MOUSE | S100 calcium binding protein A4                                   | 0    | 2.15 |
| Abca2   | ABCA2_MOUSE  | ATP-binding cassette sub-family A member 2                        | 0    | 2.15 |
| Ranbp1  | RANG_MOUSE   | Ran-specific GTPase-activating protein                            | 0.55 | 2.15 |
| Gna13   | A2AA49_MOUSE | Guanine nucleotide-binding protein subunit alpha-13               | 0    | 2.15 |

|          |              |                                                                |      |      |
|----------|--------------|----------------------------------------------------------------|------|------|
| Lamtor5  | XIP_MOUSE    | Ragulator complex protein LAMTOR5                              | 0.82 | 2.14 |
| Grap2    | Q3U0E8_MOUSE | GRB2-related adaptor protein 2, isoform CRA_b                  | 0    | 2.04 |
| Tpm1     | Q545Y3_MOUSE | Tropomyosin 1, alpha, isoform CRA_1                            | 0.29 | 2.03 |
| Plg      | PLMN_MOUSE   | Plasminogen                                                    | 0    | 2.03 |
| Leprot   | OBRG_MOUSE   | Leptin receptor gene-related protein                           | 0    | 2.03 |
| Atp5b    | ATPB_MOUSE   | ATP synthase subunit beta, mitochondrial                       | 0    | 2.02 |
| Cand1    | CAND1_MOUSE  | Cullin-associated NEDD8-dissociated protein 1                  | 0    | 2.02 |
| Psm2     | Q3TKV1_MOUSE | MCG129789, isoform CRA_b                                       | 0    | 2.02 |
| Tubb3    | TBB3_MOUSE   | Tubulin beta-3 chain                                           | 0    | 2.02 |
| Itih2    | ITIH2_MOUSE  | Inter-alpha-trypsin inhibitor heavy chain H2                   | 0    | 2.02 |
| Actr1a   | ACTZ_MOUSE   | Alpha-centractin                                               | 0.84 | 2    |
| Fam108b1 | F108B_MOUSE  | Abhydrolase domain-containing protein FAM108B1                 | 0    | 1.91 |
| Tmem9b   | TMM9B_MOUSE  | Transmembrane protein 9B                                       | 0    | 1.91 |
| Fxyd5    | Q3TDW1_MOUSE | FXD domain-containing ion transport regulator 5, isoform CRA_c | 0    | 1.9  |
| Cd82     | Q3UII2_MOUSE | CD82 antigen                                                   | 0.29 | 1.89 |
| Cd200r11 | MO2R2_MOUSE  | Cell surface glycoprotein CD200 receptor 2                     | 0    | 1.89 |
| Rsu1     | RSU1_MOUSE   | Ras suppressor protein 1                                       | 0.26 | 1.89 |
| Sfxn1    | SFXN1_MOUSE  | Sideroflexin-1                                                 | 0    | 1.89 |
| Hspe1    | Q4KL76_MOUSE | Heat shock protein 1 (Chaperonin 10)                           | 0.29 | 1.89 |
| Usp8     | UBP8_MOUSE   | Ubiquitin carboxyl-terminal hydrolase 8                        | 0    | 1.89 |
| Cxcl2    | Q3U1J5_MOUSE | Chemokine (C-X-C motif) ligand 2                               | 0.84 | 1.88 |
| Dtd2     | DTD2_MOUSE   | Probable D-tyrosyl-tRNA(Tyr) deacylase 2                       | 0    | 1.88 |
| Cerk     | CERK1_MOUSE  | Ceramide kinase                                                | 0    | 1.88 |
| Prss34   | Q6RUT2_MOUSE | Mast cell protease-11                                          | 0.55 | 1.87 |
| Csk      | CSK_MOUSE    | Tyrosine-protein kinase CSK                                    | 0    | 1.87 |
| Gna14    | GNA14_MOUSE  | Guanine nucleotide-binding protein subunit alpha-14            | 0    | 1.87 |
| Ugcg     | CEGT_MOUSE   | Ceramide glucosyltransferase                                   | 0    | 1.87 |

|               |              |                                                                                |      |      |
|---------------|--------------|--------------------------------------------------------------------------------|------|------|
| Slit2         | SLIT2_MOUSE  | Slit homolog 2 protein                                                         | 0    | 1.87 |
| Ist1          | IST1_MOUSE   | IST1 homolog                                                                   | 0.29 | 1.86 |
| Hist1h2ah     | A3KPD0_MOUSE | Histone H2A                                                                    | 0    | 1.85 |
| Slc7a1        | Q3UGD6_MOUSE | Solute carrier family 7 (Cationic amino acid transporter, y+ system), member 1 | 0    | 1.77 |
| Cct5          | TCPE_MOUSE   | T-complex protein 1 subunit epsilon                                            | 0    | 1.76 |
| 2210016F16Rik | G3X8U3_MOUSE | MCG6895                                                                        | 0.53 | 1.76 |
| Pfkl          | K6PL_MOUSE   | 6-phosphofructokinase, liver type                                              | 0    | 1.76 |
| Hnrnpc        | HNRPC_MOUSE  | Heterogeneous nuclear ribonucleoproteins C1/C2                                 | 0    | 1.76 |
| Cmtm6         | CKLF6_MOUSE  | CKLF-like MARVEL transmembrane domain-containing protein 6                     | 0    | 1.76 |
| Srsf3         | B2KF41_MOUSE | Serine/arginine-rich splicing factor 3                                         | 0    | 1.76 |
| Tmem30a       | CC50A_MOUSE  | Cell cycle control protein 50A                                                 | 0    | 1.76 |
| Itgam         | ITAM_MOUSE   | Integrin alpha-M                                                               | 0    | 1.76 |
| Tgfb1         | Q3UNK5_MOUSE | Transforming growth factor, beta 1                                             | 0.58 | 1.75 |
| Rpl23         | A2A6F9_MOUSE | 60S ribosomal protein L23                                                      | 0.52 | 1.75 |
| Vps26a        | VP26_MOUSE   | Vacuolar protein sorting-associated protein 26A                                | 0.55 | 1.75 |
| Ube2v1        | U2V1_MOUSE   | Ubiquitin-conjugating enzyme E2 variant 1                                      | 0.29 | 1.75 |
| Cct7          | Q3TIJ7_MOUSE | Chaperonin subunit 7 (Eta), isoform CRA_a                                      | 0    | 1.75 |
| Abhd14b       | ABHEB_MOUSE  | Alpha/beta hydrolase domain-containing protein 14B                             | 0.85 | 1.75 |
| Aldh7a1       | AL7A1_MOUSE  | Alpha-aminoacidic semialdehyde dehydrogenase                                   | 0    | 1.75 |
| Stat5b        | ST5B_MOUSE   | Signal transducer and activator of transcription 5B                            | 0    | 1.75 |
| Acaa1a        | THIKA_MOUSE  | 3-ketoacyl-CoA thiolase A, peroxisomal                                         | 0    | 1.74 |
| Aldh3a1       | AL3A1_MOUSE  | Aldehyde dehydrogenase, dimeric NADP-preferring                                | 0    | 1.73 |
| Hint1         | B1AZK3_MOUSE | Histidine triad nucleotide-binding protein 1                                   | 0.84 | 1.73 |
| Atp12a        | AT12A_MOUSE  | Potassium-transporting                                                         | 0.29 | 1.73 |



|           |              |                                                                   |      |      |
|-----------|--------------|-------------------------------------------------------------------|------|------|
|           |              | ATPase alpha chain 2                                              |      |      |
| Fgl2      | Q544K3_MOUSE | Fibrinogen-like protein                                           | 0    | 1.73 |
| Ctnna1    | Q545R0_MOUSE | Catenin (Cadherin associated protein), alpha 1                    | 0    | 1.63 |
| Pi4k2a    | P4K2A_MOUSE  | Phosphatidylinositol 4-kinase type 2-alpha                        | 0    | 1.63 |
| Wbp2      | WBP2_MOUSE   | WW domain-binding protein 2                                       | 0.58 | 1.62 |
| Rpl26     | Q4FZH2_MOUSE | MCG50660, isoform CRA_a                                           | 0    | 1.62 |
| Ube2i     | UBCI_MOUSE   | SUMO-conjugating enzyme UBC9                                      | 0.26 | 1.61 |
| Psen1     | Q3UYK2_MOUSE | Presenilin 1, isoform CRA_a                                       | 0    | 1.61 |
| Apex1     | Q544Z7_MOUSE | Apurinic/apyrimidinic endonuclease 1                              | 0    | 1.6  |
| Icam1     | Q3U8M7_MOUSE | Intercellular adhesion molecule                                   | 0.55 | 1.6  |
| Flrt3     | Q6ZPQ1_MOUSE | MKIAA1469 protein                                                 | 0    | 1.59 |
| Cdh1      | Q4KML8_MOUSE | Cadherin 1, isoform CRA_a                                         | 0.29 | 1.5  |
| Tuba4a    | TBA4A_MOUSE  | Tubulin alpha-4A chain                                            | 0    | 1.5  |
| Rpl35a    | Q6ZWX1_MOUSE | MCG1036414                                                        | 0    | 1.49 |
| Rps26     | Q497N1_MOUSE | MCG18667                                                          | 0.81 | 1.49 |
| Pfkm      | K6PF_MOUSE   | 6-phosphofructokinase, muscle type                                | 0    | 1.49 |
| D10Jhu81e | ES1_MOUSE    | ES1 protein homolog, mitochondrial                                | 0    | 1.49 |
| Rasl2-9   | A6H622_MOUSE | MCG131225                                                         | 0.86 | 1.49 |
| Itga5     | ITA5_MOUSE   | Integrin alpha-5                                                  | 0    | 1.49 |
| Adss      | B9EIE9_MOUSE | Adenylosuccinate synthetase isozyme 2                             | 0.85 | 1.48 |
| Serpinb2  | Q542A3_MOUSE | Serine (Or cysteine) peptidase inhibitor, clade B, member 2       | 0.27 | 1.48 |
| Scarb1    | Q4FK30_MOUSE | Scarb1 protein                                                    | 0    | 1.48 |
| Plcg2     | PLCG2_MOUSE  | 1-phosphatidylinositol 4,5-bisphosphate phosphodiesterase gamma-2 | 0    | 1.48 |
| Syncrip   | HNRPQ_MOUSE  | Heterogeneous nuclear ribonucleoprotein Q                         | 0.81 | 1.48 |
| Prkca     | KPCA_MOUSE   | Protein kinase C alpha type                                       | 0.52 | 1.48 |
| Glpr1     | Q4QQK5_MOUSE | GLI pathogenesis-related 1 (Glioma)                               | 0    | 1.48 |
| Tardbp    | Q544R5_MOUSE | MCG16669, isoform CRA_b                                           | 0    | 1.48 |
| Tmed10    | TMEDA_MOUSE  | Transmembrane emp24 domain-containing protein 10                  | 0.29 | 1.48 |
| Purb      | PURB_MOUSE   | Transcriptional activator                                         | 0.58 | 1.48 |

|         |              |                                                    |      |      |
|---------|--------------|----------------------------------------------------|------|------|
|         |              | protein Pur-beta                                   |      |      |
| Gm6768  | J3QND8_MOUSE | Uncharacterized protein                            | 0.29 | 1.48 |
| Smpdl3a | ASM3A_MOUSE  | Acid sphingomyelinase-like phosphodiesterase 3a    | 0.86 | 1.48 |
| Milr1   | MILR1_MOUSE  | Allergin-1                                         | 0    | 1.47 |
| Plscr4  | B1B195_MOUSE | Phospholipid scramblase 4                          | 0.29 | 1.46 |
| Arhgef1 | ARHG1_MOUSE  | Rho guanine nucleotide exchange factor 1           | 0.58 | 1.46 |
| Pdlim5  | PDLI5_MOUSE  | PDZ and LIM domain protein 5                       | 0    | 1.46 |
| Cd200r5 | MO2R5_MOUSE  | Cell surface glycoprotein CD200 receptor 5         | 0.82 | 1.36 |
| Cnr2    | CNR2_MOUSE   | Cannabinoid receptor 2                             | 0    | 1.36 |
| 2-Sep   | SEPT2_MOUSE  | Septin-2                                           | 0    | 1.36 |
| Dnajb11 | DJB11_MOUSE  | DnaJ homolog subfamily B member 11                 | 0    | 1.35 |
| Il2ra   | Q544I2_MOUSE | Interleukin 2 receptor, alpha chain                | 0    | 1.35 |
| Itga6   | ITA6_MOUSE   | Integrin alpha-6                                   | 0    | 1.35 |
| Ehd1    | Q80ZZ0_MOUSE | EH-domain containing 1                             | 0    | 1.35 |
| Fam174b | F174B_MOUSE  | Membrane protein FAM174B                           | 0    | 1.35 |
| Fis1    | TTCB_MOUSE   | Mitochondrial fission 1 protein                    | 0    | 1.35 |
| Hbb-b1  | A8DUK0_MOUSE | Beta-globin                                        | 0.29 | 1.35 |
| Tmem55b | TM55B_MOUSE  | Transmembrane protein 55B                          | 0    | 1.35 |
| Snx17   | SNX17_MOUSE  | Sorting nexin-17                                   | 0    | 1.35 |
| Capns1  | CPNS1_MOUSE  | Calpain small subunit 1                            | 0    | 1.35 |
| Ccl2    | Q5SVU3_MOUSE | Ccl2 protein                                       | 0    | 1.35 |
| Adcy7   | ADCY7_MOUSE  | Adenylate cyclase type 7                           | 0.86 | 1.34 |
| Rpl34   | RL34_MOUSE   | 60S ribosomal protein L34                          | 0.82 | 1.34 |
| Casp3   | CASP3_MOUSE  | Caspase-3                                          | 0.86 | 1.34 |
| Gmgs    | GMDS_MOUSE   | GDP-mannose 4,6 dehydratase                        | 0.86 | 1.34 |
| Pcmt1   | Q545L9_MOUSE | Protein-L-isoaspartate O-methyltransferase         | 0    | 1.33 |
| Tubb2b  | B2RSN3_MOUSE | MCG1395                                            | 0.29 | 1.23 |
| Ptpre   | PTPRE_MOUSE  | Receptor-type tyrosine-protein phosphatase epsilon | 0    | 1.22 |
| Aco1    | ACOC_MOUSE   | Cytoplasmic aconitate hydratase                    | 0.56 | 1.22 |
| Rpl37a  | Q4VAF2_MOUSE | MCG112980, isoform CRA_a                           | 0    | 1.22 |
| P2rx1   | B2KG89_MOUSE | P2X purinoceptor 1                                 | 0.29 | 1.22 |
| Spr     | SPRE_MOUSE   | Sepiapterin reductase                              | 0.26 | 1.22 |

|         |              |                                                            |      |      |
|---------|--------------|------------------------------------------------------------|------|------|
| Mboat7  | MBOA7_MOUSE  | Lysophospholipid acyltransferase 7                         | 0.29 | 1.22 |
| Tceb1   | ELOC_MOUSE   | Transcription elongation factor B polypeptide 1            | 0    | 1.22 |
| Fnbp1   | FNBP1_MOUSE  | Formin-binding protein 1                                   | 0    | 1.21 |
| Slc1a5  | Q3UFR4_MOUSE | Putative uncharacterized protein                           | 0.58 | 1.21 |
| Mt2     | MT2_MOUSE    | Metallothionein-2                                          | 0.56 | 1.21 |
| Cd37    | Q4FK35_MOUSE | CD37 antigen, isoform CRA_b                                | 0    | 1.21 |
| Rpl29   | Q5M8M8_MOUSE | MCG19505, isoform CRA_a                                    | 0    | 1.21 |
| Hadh    | HCDH_MOUSE   | Hydroxyacyl-coenzyme A dehydrogenase, mitochondrial        | 0    | 1.21 |
| Cuta    | CUTA_MOUSE   | Protein CutA                                               | 0.86 | 1.21 |
| Mfsd6   | D3Z183_MOUSE | Major facilitator superfamily domain-containing protein 6  | 0    | 1.21 |
| Tm9sf3  | T9S3_MOUSE   | Transmembrane 9 superfamily member 3                       | 0    | 1.2  |
| Itga4   | ITA4_MOUSE   | Integrin alpha-4                                           | 0    | 1.2  |
| Tubb4b  | TBB4B_MOUSE  | Tubulin beta-4B chain                                      | 0    | 1.2  |
| Erp44   | TXN4_MOUSE   | Endoplasmic reticulum resident protein 44                  | 0    | 1.19 |
| Cuedc1  | CUED1_MOUSE  | CUE domain-containing protein 1                            | 0    | 1.18 |
| Akr1c19 | G3X9Y6_MOUSE | Aldo-keto reductase family 1, member C19                   | 0    | 1.1  |
| Tspan3  | Q545L1_MOUSE | Tetraspanin                                                | 0    | 1.1  |
| Ulbp1   | D2CKI9_MOUSE | UL16-binding protein-like transcript 1 splice variant      | 0    | 1.09 |
| Ufm1    | UFM1_MOUSE   | Ubiquitin-fold modifier 1                                  | 0    | 1.09 |
| Slco4a1 | A2ACT3_MOUSE | Solute carrier organic anion transporter family member 4A1 | 0    | 1.09 |
| Psmb9   | Q4FK25_MOUSE | Proteasome subunit beta type                               | 0.27 | 1.08 |
| Rpl24   | RL24_MOUSE   | 60S ribosomal protein L24                                  | 0.26 | 1.08 |
| Gna11   | Q3UPA1_MOUSE | Guanine nucleotide binding protein, alpha 11               | 0    | 1.08 |
| Fam3c   | FAM3C_MOUSE  | Protein FAM3C                                              | 0.58 | 1.08 |
| Phpt1   | A2AJA8_MOUSE | 14 kDa phosphohistidine phosphatase                        | 0.29 | 1.08 |
| Tbxas1  | THAS_MOUSE   | Thromboxane-A synthase                                     | 0    | 1.08 |
| Cds2    | A2AMQ4_MOUSE | Phosphatidate cytidyltransferase 2                         | 0.27 | 1.08 |
| Gpr171  | GP171_MOUSE  | Probable G-protein coupled                                 | 0    | 1.08 |

|           |              |                                                                        |      |      |
|-----------|--------------|------------------------------------------------------------------------|------|------|
|           |              | receptor 171                                                           |      |      |
| Laptm4a   | LAP4A_MOUSE  | Lysosomal-associated transmembrane protein 4A                          | 0    | 1.08 |
| Abcb1b    | B2RUR3_MOUSE | ATP-binding cassette, sub-family B (MDR/TAP), member 1B                | 0    | 1.08 |
| Ninj1     | Q3TXT8_MOUSE | Ninjurin 1                                                             | 0    | 1.07 |
| Adsl      | PUR8_MOUSE   | Adenylosuccinate lyase                                                 | 0    | 1.07 |
| Psm12     | PSD12_MOUSE  | 26S proteasome non-ATPase regulatory subunit 12                        | 0    | 1.07 |
| Fgfr1     | FGFR1_MOUSE  | Fibroblast growth factor receptor 1                                    | 0    | 1.07 |
| Lst1      | LST1_MOUSE   | Leukocyte-specific transcript 1 protein                                | 0    | 1.07 |
| Dhrs11    | DHR11_MOUSE  | Dehydrogenase/reductase SDR family member 11                           | 0    | 1.06 |
| Slc30a2   | ZNT2_MOUSE   | Zinc transporter 2                                                     | 0    | 1.06 |
| Selplg    | SELPL_MOUSE  | P-selectin glycoprotein ligand 1                                       | 0    | 1.06 |
| Neu1      | Q3UL64_MOUSE | Neuraminidase 1, isoform CRA_a                                         | 0    | 1.06 |
| Hmha1     | HMHA1_MOUSE  | Minor histocompatibility protein HA-1                                  | 0.29 | 1.06 |
| Psm5      | PSB5_MOUSE   | Proteasome subunit beta type-5                                         | 0.27 | 0.96 |
| Taok3     | TAOK3_MOUSE  | Serine/threonine-protein kinase TAO3                                   | 0    | 0.95 |
| Kidins220 | B2RXL7_MOUSE | Kidins220 protein                                                      | 0    | 0.94 |
| Rpl13a    | Q5M9M0_MOUSE | MCG23455, isoform CRA_e                                                | 0    | 0.94 |
| Cnpy2     | CNPY2_MOUSE  | Protein canopy homolog 2                                               | 0    | 0.93 |
| Ppp2cb    | PP2AB_MOUSE  | Serine/threonine-protein phosphatase 2A catalytic subunit beta isoform | 0.86 | 0.83 |
| Stx4      | STX4_MOUSE   | Syntaxin-4                                                             | 0    | 0.81 |
| Fyb       | B2RUR0_MOUSE | FYN binding protein                                                    | 0.58 | 0.81 |
| Rnpep     | AMPB_MOUSE   | Aminopeptidase B                                                       | 0    | 0.81 |
| Mecp2     | MECP2_MOUSE  | Methyl-CpG-binding protein 2                                           | 0.29 | 0.8  |
| Kcnab2    | KCAB2_MOUSE  | Voltage-gated potassium channel subunit beta-2                         | 0    | 0.8  |
| Mfap3l    | MFA3L_MOUSE  | Microfibrillar-associated protein 3-like                               | 0    | 0.68 |

Table S3

| Gene name | UniProt ID   | Uniprot description                                  | Normalized PCMC spectral counts (avg.) | Normalized BMCMC spectral counts (avg.) | Mean spectral counts of shared proteins |
|-----------|--------------|------------------------------------------------------|----------------------------------------|-----------------------------------------|-----------------------------------------|
| ALB       | ALBU_BOVIN   | Serum albumin                                        | 190.95                                 | 209.58                                  | 200.27                                  |
| Anpep     | AMPN_MOUSE   | Aminopeptidase N                                     | 213.66                                 | 170.67                                  | 192.17                                  |
| Man2b1    | MA2B1_MOUSE  | Lysosomal alpha-mannosidase                          | 162.04                                 | 195.21                                  | 178.63                                  |
| Grn       | Q544Y8_MOUSE | Granulin                                             | 137.44                                 | 103.4                                   | 120.42                                  |
| Cpa3      | Q542E3_MOUSE | Carboxypeptidase A3, mast cell                       | 166.55                                 | 46.79                                   | 106.67                                  |
| Man2b2    | MA2B2_MOUSE  | Epididymis-specific alpha-mannosidase                | 142.38                                 | 48.62                                   | 95.5                                    |
| Hexb      | Q3TXR9_MOUSE | Putative uncharacterized protein                     | 138.51                                 | 42.62                                   | 90.56                                   |
| Glb1      | Q3TAW7_MOUSE | Beta-galactosidase                                   | 106.38                                 | 55.5                                    | 80.94                                   |
| Naglu     | A2BFA6_MOUSE | Alpha-N-acetylglucosaminidase                        | 105.93                                 | 38.96                                   | 72.44                                   |
| Cma1      | CMA1_MOUSE   | Mast cell protease 5                                 | 113.96                                 | 30.3                                    | 72.13                                   |
| Pkm       | KPYM_MOUSE   | Pyruvate kinase isozymes M1/M2                       | 45.4                                   | 87.59                                   | 66.5                                    |
| Tln1      | TLN1_MOUSE   | Talin-1                                              | 80.15                                  | 51.73                                   | 65.94                                   |
| Tpsb2     | B5A5B2_MOUSE | Tryptase beta 2                                      | 106.77                                 | 24.32                                   | 65.54                                   |
| Pdcd6ip   | PDC6I_MOUSE  | Programmed cell death 6-interacting protein          | 89.03                                  | 39.59                                   | 64.31                                   |
| Lcp1      | PLSL_MOUSE   | Plastin-2                                            | 61.34                                  | 64.68                                   | 63.01                                   |
| Iqgap1    | IQGA1_MOUSE  | Ras GTPase-activating-like protein IQGAP1            | 79.6                                   | 44.75                                   | 62.18                                   |
| Myh9      | MYH9_MOUSE   | Myosin-9                                             | 41.59                                  | 81.99                                   | 61.79                                   |
| Aldoa     | Q5FWB7_MOUSE | Fructose-bisphosphate aldolase                       | 68.73                                  | 53.66                                   | 61.19                                   |
| Lgals3bp  | LG3BP_MOUSE  | Galectin-3-binding protein                           | 64.19                                  | 51.36                                   | 57.78                                   |
| Vwa5a     | VMA5A_MOUSE  | von Willebrand factor A domain-containing protein 5A | 87.43                                  | 26.63                                   | 57.03                                   |
| Slc3a2    | 4F2_MOUSE    | 4F2 cell-surface antigen heavy chain                 | 70                                     | 42.98                                   | 56.49                                   |
| Actb      | B2RRX1_MOUSE | Actin, beta                                          | 50.37                                  | 59.38                                   | 54.88                                   |
| Creg1     | CREG1_MOUSE  | Protein CREG1                                        | 56.2                                   | 50.63                                   | 53.41                                   |
| Kit       | KIT_MOUSE    | Mast/stem cell growth factor receptor Kit            | 35.62                                  | 70.4                                    | 53.01                                   |
| Calr      | B2MWM9_MOUSE | Calreticulin                                         | 65.93                                  | 39.57                                   | 52.75                                   |
| Gns       | GNS_MOUSE    | N-acetylglucosamine-6-sulfatase                      | 64.65                                  | 37.9                                    | 51.28                                   |
| Ctsc      | Q3UBY5_MOUSE | Cathepsin C, isoform CRA_b                           | 41.02                                  | 61.15                                   | 51.09                                   |
| Eno1      | Q5FW97_MOUSE | Enolase 1, alpha non-neuron                          | 42.12                                  | 59.99                                   | 51.05                                   |
| Wdr1      | WDR1_MOUSE   | WD repeat-containing protein 1                       | 56.29                                  | 44.63                                   | 50.46                                   |
| E2fhv9    | E2FHV9_MOUSE | Protease serine 34                                   | 12.61                                  | 86.36                                   | 49.49                                   |
| Serpinb1a | ILEUA_MOUSE  | Leukocyte elastase inhibitor A                       | 59.5                                   | 39.32                                   | 49.41                                   |
| Basp1     | BASP1_MOUSE  | Brain acid soluble protein 1                         | 66.59                                  | 29.84                                   | 48.22                                   |

|         |              |                                                          |       |       |       |
|---------|--------------|----------------------------------------------------------|-------|-------|-------|
| Hexa    | HEXA_MOUSE   | Beta-hexosaminidase subunit alpha                        | 53.5  | 41.9  | 47.7  |
| Sod1    | SODC_MOUSE   | Superoxide dismutase [Cu-Zn]                             | 61.07 | 33.97 | 47.52 |
| Csf2rb2 | IL3B2_MOUSE  | Interleukin-3 receptor class 2 subunit beta              | 22.95 | 72.02 | 47.49 |
| Gaa     | A2AFL4_MOUSE | Lysosomal alpha-glucosidase                              | 53.39 | 38.96 | 46.18 |
| Il1rl1  | ILRL1_MOUSE  | Interleukin-1 receptor-like 1                            | 21.7  | 70.15 | 45.92 |
| Vcl     | VINC_MOUSE   | Vinculin                                                 | 55.11 | 35.18 | 45.15 |
| Gapdh   | D2KHZ9_MOUSE | Glyceraldehyde-3-phosphate dehydrogenase                 | 35.89 | 54.15 | 45.02 |
| Acta2   | ACTA_MOUSE   | Actin, aortic smooth muscle                              | 49.57 | 40.44 | 45    |
| Msn     | MOES_MOUSE   | Moesin                                                   | 42    | 46.27 | 44.13 |
| Tryp    | TRYP_PIG     | Trypsin                                                  | 59.5  | 25.1  | 42.3  |
| Tpi1    | TPIS_MOUSE   | Triosephosphate isomerase                                | 47.5  | 36.44 | 41.97 |
| Tkt     | TKT_MOUSE    | Transketolase                                            | 52.83 | 28.86 | 40.84 |
| Hspa8   | HSP7C_MOUSE  | Heat shock cognate 71 kDa protein                        | 37.04 | 44.53 | 40.78 |
| Naga    | NAGAB_MOUSE  | Alpha-N-acetylgalactosaminidase                          | 33.15 | 47.65 | 40.4  |
| Ctsa    | Q544R6_MOUSE | Protective protein for beta-galactosidase, isoform CRA_a | 49.61 | 31.14 | 40.37 |
| Ctsd    | Q3UCD9_MOUSE | Cathepsin D, isoform CRA_a                               | 51.42 | 29.1  | 40.26 |
| Eef1a1  | Q58E64_MOUSE | Elongation factor 1-alpha                                | 50.25 | 28.82 | 39.54 |
| Pgam1   | Q3U7Z6_MOUSE | MCG113582                                                | 54.21 | 24.31 | 39.26 |
| Hspa5   | A2AUF6_MOUSE | 78 kDa glucose-regulated protein                         | 38.57 | 39.89 | 39.23 |
| Sdcbp   | SDCB1_MOUSE  | Syntenin-1                                               | 44.61 | 33.82 | 39.21 |
| Gsn     | A2AL35_MOUSE | Gelsolin                                                 | 47.95 | 30.15 | 39.05 |
| Gm2a    | Q5F1Z8_MOUSE | GM2 ganglioside activator protein                        | 49.24 | 25.34 | 37.29 |
| Pgk1    | PGK1_MOUSE   | Phosphoglycerate kinase 1                                | 30.4  | 42.99 | 36.7  |
| Arhgdib | GDIR2_MOUSE  | Rho GDP-dissociation inhibitor 2                         | 54.46 | 18.32 | 36.39 |
| Pla2g7  | PAFA_MOUSE   | Platelet-activating factor acetylhydrolase               | 69.22 | 2.28  | 35.75 |
| Ids     | IDS_MOUSE    | Iduronate 2-sulfatase                                    | 51.82 | 17.65 | 34.73 |
| Arsa    | ARSA_MOUSE   | Arylsulfatase A                                          | 54.35 | 15.1  | 34.72 |
| Vcp     | TERA_MOUSE   | Transitional endoplasmic reticulum ATPase                | 37.33 | 30.72 | 34.03 |
| Sqstm1  | SQSTM_MOUSE  | Sequestosome-1                                           | 37.92 | 29.39 | 33.65 |
| Cap1    | CAP1_MOUSE   | Adenylyl cyclase-associated protein 1                    | 33.05 | 33.36 | 33.2  |
| Pdia3   | PDIA3_MOUSE  | Protein disulfide-isomerase A3                           | 24.78 | 40.57 | 32.67 |
| Lnpep   | LCAP_MOUSE   | Leucyl-cystinyl aminopeptidase                           | 32.1  | 29.99 | 31.04 |
| Alb_mus | Q546G4_MOUSE | Albumin 1                                                | 24.68 | 37.31 | 31    |
| Rnh1    | RINI_MOUSE   | Ribonuclease inhibitor                                   | 27.79 | 33.83 | 30.81 |
| P4hb    | PDIA1_MOUSE  | Protein disulfide-isomerase                              | 28.52 | 32.39 | 30.45 |
| Ctsb    | CATB_MOUSE   | Cathepsin B                                              | 38.07 | 21.59 | 29.83 |
| Hist4a  | H4_MACFA     | Histone H4                                               | 13.17 | 46.08 | 29.62 |
| Pfn1    | Q5SX50_MOUSE | Profilin                                                 | 24.99 | 34.1  | 29.54 |
| Pld3    | PLD3_MOUSE   | Phospholipase D3                                         | 29.87 | 28.17 | 29.02 |

|          |              |                                                      |       |       |       |
|----------|--------------|------------------------------------------------------|-------|-------|-------|
| Apeh     | APEH_MOUSE   | Acylamino-acid-releasing enzyme                      | 24.57 | 33.32 | 28.95 |
| Tagln2   | TAGL2_MOUSE  | Transgelin-2                                         | 35.73 | 21.08 | 28.4  |
| Akr1c13  | AK1CD_MOUSE  | Aldo-keto reductase family 1 member C13              | 16.96 | 38.98 | 27.97 |
| Tuba1a   | TBA1_MOUSE   | Tubulin alpha-1A chain                               | 35.09 | 19.51 | 27.3  |
| Manba    | MANBA_MOUSE  | Beta-mannosidase                                     | 21.56 | 32.91 | 27.23 |
| Arhgdia  | GDIR1_MOUSE  | Rho GDP-dissociation inhibitor 1                     | 35.43 | 18.49 | 26.96 |
| Plbd2    | PLBL2_MOUSE  | Putative phospholipase B-like 2                      | 35.49 | 16.73 | 26.11 |
| Psap     | Q3UFE8_MOUSE | Prosaposin, isoform CRA_e                            | 29.83 | 22.34 | 26.09 |
| Chi3l3   | Q3U462_MOUSE | Putative uncharacterized protein                     | 25.09 | 26.91 | 26    |
| Dnase2a  | Q3UM14_MOUSE | Deoxyribonuclease II alpha                           | 29.52 | 21.96 | 25.74 |
| Ppia     | Q5SVY2_MOUSE | Peptidyl-prolyl cis-trans isomerase                  | 16.19 | 34.4  | 25.29 |
| Dpp7     | DPP2_MOUSE   | Dipeptidyl peptidase 2                               | 37.99 | 12.29 | 25.14 |
| ALB_hum  | ALBU_HUMAN   | Serum albumin                                        | 30.3  | 19.86 | 25.08 |
| Selenbp1 | SBP1_MOUSE   | Selenium-binding protein 1                           | 32.93 | 16.96 | 24.95 |
| Gdi2     | GDIB_MOUSE   | Rab GDP dissociation inhibitor beta                  | 16.06 | 33.47 | 24.76 |
| Cfl1     | Q544Y7_MOUSE | Cofilin 1, non-muscle                                | 11.43 | 36.97 | 24.2  |
| Tgm2     | TGM2_MOUSE   | Protein-glutamine gamma-glutamyltransferase 2        | 33.99 | 14.27 | 24.13 |
| Ywhaz    | 1433Z_MOUSE  | 14-3-3 protein zeta/delta                            | 24.43 | 23.35 | 23.89 |
| Atp1a1   | AT1A1_MOUSE  | Sodium/potassium-transporting ATPase subunit alpha-1 | 11.72 | 35.81 | 23.77 |
| Ggh      | GGH_MOUSE    | Gamma-glutamyl hydrolase                             | 28.25 | 19.14 | 23.7  |
| Lgals1   | LEG1_MOUSE   | Galectin-1                                           | 29.42 | 17.51 | 23.47 |
| Gla      | AGAL_MOUSE   | Alpha-galactosidase A                                | 12.76 | 34.05 | 23.4  |
| Hspa4    | HSP74_MOUSE  | Heat shock 70 kDa protein 4                          | 30.72 | 15.75 | 23.23 |
| Eef2     | EF2_MOUSE    | Elongation factor 2                                  | 22.64 | 23.74 | 23.19 |
| Gda      | Q548F2_MOUSE | Guanine deaminase                                    | 23.74 | 21.98 | 22.86 |
| Cltc     | CLH_MOUSE    | Clathrin heavy chain                                 | 22.45 | 23.06 | 22.75 |
| Mdh2     | MDHM_MOUSE   | Malate dehydrogenase, mitochondrial                  | 23.78 | 21.61 | 22.7  |
| Gusb     | BGLR_MOUSE   | Beta-glucuronidase                                   | 40.36 | 4.18  | 22.27 |
| Txnrd1   | TRXR1_MOUSE  | Thioredoxin reductase 1, cytoplasmic                 | 29.28 | 14.98 | 22.13 |
| Ada      | Q4FK28_MOUSE | Ada protein                                          | 31.29 | 12.83 | 22.06 |
| Ptprc    | PTPRC_MOUSE  | Receptor-type tyrosine-protein phosphatase C         | 12.84 | 29.82 | 21.33 |
| Clic1    | Q542F1_MOUSE | Chloride intracellular channel 1, isoform CRA_c      | 29.83 | 12.57 | 21.2  |
| Pebp1    | Q5EBQ2_MOUSE | MCG7941, isoform CRA_f                               | 26.99 | 14.92 | 20.96 |
| Hsp90ab1 | Q71LX8_MOUSE | Heat shock protein 84b                               | 22.25 | 19.14 | 20.7  |
| Prcp     | PCP_MOUSE    | Lysosomal Pro-X carboxypeptidase                     | 21.19 | 20.13 | 20.66 |
| Gdi1     | GDIA_MOUSE   | Rab GDP dissociation inhibitor alpha                 | 25.45 | 15.41 | 20.43 |
| Slc7a8   | LAT2_MOUSE   | Large neutral amino acids                            | 27.64 | 13.1  | 20.37 |

|        |              |                                                                                                            |       |       |       |
|--------|--------------|------------------------------------------------------------------------------------------------------------|-------|-------|-------|
|        |              | transporter small subunit 2                                                                                |       |       |       |
| Esd    | ESTD_MOUSE   | S-formylglutathione hydrolase                                                                              | 22.6  | 17.54 | 20.07 |
| Anxa6  | ANXA6_MOUSE  | Annexin A6                                                                                                 | 12.59 | 26.91 | 19.75 |
| Adk    | ADK_MOUSE    | Adenosine kinase                                                                                           | 33.38 | 5.51  | 19.45 |
| Npepps | PSA_MOUSE    | Puromycin-sensitive aminopeptidase                                                                         | 13.34 | 25.33 | 19.34 |
| Nhlrc3 | NHLC3_MOUSE  | NHL repeat-containing protein 3                                                                            | 26.96 | 11.08 | 19.02 |
| Mfge8  | MFGM_MOUSE   | Lactadherin                                                                                                | 10.04 | 27.53 | 18.78 |
| Actn4  | Q3ULT2_MOUSE | Actinin alpha 4                                                                                            | 14.14 | 22.68 | 18.41 |
| Lta4h  | LKHA4_MOUSE  | Leukotriene A-4 hydrolase                                                                                  | 13.29 | 22.87 | 18.08 |
| Dld    | DLDH_MOUSE   | Dihydrolipoyl dehydrogenase, mitochondrial                                                                 | 16.94 | 18.88 | 17.91 |
| Ywhab  | A2A5N2_MOUSE | Tyrosine 3-monooxygenase/tryptophan 5-monooxygenase activation protein, beta polypeptide                   | 24.85 | 10.9  | 17.87 |
| Hspa2  | HSP72_MOUSE  | Heat shock-related 70 kDa protein 2                                                                        | 22.51 | 12.16 | 17.34 |
| Ldha   | Q564E2_MOUSE | L-lactate dehydrogenase                                                                                    | 20.79 | 13.78 | 17.28 |
| Nucb1  | NUCB1_MOUSE  | Nucleobindin-1                                                                                             | 20.86 | 13.46 | 17.16 |
| Gzmb   | Q3TZH4_MOUSE | Granzyme B                                                                                                 | 3.93  | 30.35 | 17.14 |
| Uba1   | UBA1_MOUSE   | Ubiquitin-like modifier-activating enzyme 1                                                                | 17.59 | 16.54 | 17.07 |
| Ctbs   | Q102J0_MOUSE | Chitinase, di-N-acetyl-, isoform CRA_a                                                                     | 11.13 | 22.87 | 17    |
| Ywhaq  | A3KML3_MOUSE | MCG126220                                                                                                  | 20.92 | 13.07 | 16.99 |
| Lamp1  | Q3TA96_MOUSE | Lysosomal membrane glycoprotein 1, isoform CRA_c                                                           | 20.27 | 13.62 | 16.95 |
| Cd97   | CD97_MOUSE   | CD97 antigen                                                                                               | 18.98 | 14.82 | 16.9  |
| Npc1   | NPC1_MOUSE   | Niemann-Pick C1 protein                                                                                    | 26.46 | 7.32  | 16.89 |
| Ywhae  | Q5SS40_MOUSE | Tyrosine 3-monooxygenase/tryptophan 5-monooxygenase activation protein, epsilon polypeptide, isoform CRA_c | 18.46 | 15.07 | 16.76 |
| Sord   | DHSO_MOUSE   | Sorbitol dehydrogenase                                                                                     | 17.28 | 16.19 | 16.74 |
| Capzb  | A2AMV5_MOUSE | F-actin-capping protein subunit beta                                                                       | 21.03 | 12.15 | 16.59 |
| Aldh2  | Q544B1_MOUSE | Aldehyde dehydrogenase 2, mitochondrial, isoform CRA_b                                                     | 6.41  | 26.57 | 16.49 |
| Nme1   | Q5NC81_MOUSE | Nucleoside diphosphate kinase                                                                              | 21.24 | 10.76 | 16    |
| Coro1a | Q3U1N0_MOUSE | Coronin                                                                                                    | 8.38  | 23.49 | 15.93 |
| Prdx1  | B1AXW7_MOUSE | Peroxiredoxin-1                                                                                            | 16.66 | 14.95 | 15.81 |
| Copb2  | COPB2_MOUSE  | Coatomer subunit beta'                                                                                     | 16.68 | 14.77 | 15.73 |
| Npc2   | NPC2_MOUSE   | Epididymal secretory protein E1                                                                            | 19.56 | 11.77 | 15.67 |
| Pdia4  | PDIA4_MOUSE  | Protein disulfide-isomerase A4                                                                             | 4.8   | 26.29 | 15.54 |
| Vat1   | VAT1_MOUSE   | Synaptic vesicle membrane protein                                                                          | 17.28 | 13.73 | 15.5  |



|          |              |                                                            |       |       |       |
|----------|--------------|------------------------------------------------------------|-------|-------|-------|
|          |              | VAT-1 homolog                                              |       |       |       |
| H2-D1    | Q792Z7_MOUSE | H-2 class I histocompatibility antigen, D-K alpha chain    | 18.8  | 12.02 | 15.41 |
| P2rx4    | P2RX4_MOUSE  | P2X purinoceptor 4                                         | 16.76 | 13.92 | 15.34 |
| Rab7     | Q4FJQ0_MOUSE | MCG130610                                                  | 8.8   | 21.75 | 15.27 |
| Flnb     | FLNB_MOUSE   | Filamin-B                                                  | 26.19 | 4.16  | 15.17 |
| Pdxk     | PDXX_MOUSE   | Pyridoxal kinase                                           | 18.43 | 11.75 | 15.09 |
| Tax1bp1  | TAXB1_MOUSE  | Tax1-binding protein 1 homolog                             | 10.6  | 19.54 | 15.07 |
| Dpysl2   | DPYL2_MOUSE  | Dihydropyrimidinase-related protein 2                      | 15.59 | 14.15 | 14.87 |
| Gpx1     | GPX1_MOUSE   | Glutathione peroxidase 1                                   | 17.21 | 12.26 | 14.74 |
| Plxdc2   | B1AY84_MOUSE | Plexin domain-containing protein 2                         | 13.09 | 16.36 | 14.72 |
| Cdc42    | CDC42_MOUSE  | Cell division control protein 42 homolog                   | 15.29 | 14.14 | 14.72 |
| Hsp90aa1 | Q80Y52_MOUSE | Heat shock protein 90, alpha (Cytosolic), class A member 1 | 16.72 | 12.68 | 14.7  |
| Capg     | CAPG_MOUSE   | Macrophage-capping protein                                 | 20.41 | 8.25  | 14.33 |
| Tpp1     | TPP1_MOUSE   | Tripeptidyl-peptidase 1                                    | 22.77 | 5.89  | 14.33 |
| Tal1     | TAL1_MOUSE   | T-cell acute lymphocytic leukemia protein 1 homolog        | 18.35 | 10.25 | 14.3  |
| Serinc3  | A2A5I1_MOUSE | Serine incorporator 3                                      | 13.92 | 14.46 | 14.19 |
| Pgm1     | PGM1_MOUSE   | Phosphoglucomutase-1                                       | 14.02 | 14.16 | 14.09 |
| Hk1      | HXK1_MOUSE   | Hexokinase-1                                               | 4.44  | 23.58 | 14.01 |
| Gstm1    | GSTM1_MOUSE  | Glutathione S-transferase Mu 1                             | 14.79 | 12.56 | 13.68 |
| Ero11    | Q4FK57_MOUSE | Ero11 protein                                              | 17.08 | 10.23 | 13.65 |
| Cndp2    | CNDP2_MOUSE  | Cytosolic non-specific dipeptidase                         | 14.74 | 12.55 | 13.64 |
| Blmh     | BLMH_MOUSE   | Bleomycin hydrolase                                        | 14.49 | 12.7  | 13.59 |
| Vim      | Q5FWJ3_MOUSE | Vimentin                                                   | 8.62  | 18.49 | 13.55 |
| Canx     | Q5SUC3_MOUSE | Calnexin, isoform CRA_a                                    | 10.89 | 16.15 | 13.52 |
| Slc18a2  | VMT2_MOUSE   | Synaptic vesicular amine transporter                       | 21.14 | 5.79  | 13.46 |
| Itm2b    | ITM2B_MOUSE  | Integral membrane protein 2B                               | 2.8   | 23.9  | 13.35 |
| Mdh1     | MDHC_MOUSE   | Malate dehydrogenase, cytoplasmic                          | 16.65 | 9.99  | 13.32 |
| Pla2g15  | PAG15_MOUSE  | Group XV phospholipase A2                                  | 17.09 | 9.03  | 13.06 |
| Ttyh3    | TTYH3_MOUSE  | Protein tweety homolog 3                                   | 16.43 | 9.69  | 13.06 |
| Ly6e     | LY6E_MOUSE   | Lymphocyte antigen 6E                                      | 5.3   | 20.78 | 13.04 |
| Calml    | CALM_MOUSE   | Calmodulin                                                 | 17.86 | 7.68  | 12.77 |
| Ctsz     | Q545I6_MOUSE | Cathepsin Z, isoform CRA_b                                 | 9.46  | 16.05 | 12.76 |
| Capza1   | CAZA1_MOUSE  | F-actin-capping protein subunit alpha-1                    | 12.25 | 13.22 | 12.74 |
| Rnf128   | B1AVW8_MOUSE | E3 ubiquitin-protein ligase RNF128                         | 4.17  | 21.18 | 12.68 |
| Prdx6    | Q53ZU7_MOUSE | Peroxiredoxin 6                                            | 11.44 | 13.48 | 12.46 |
| Gpi      | G6PI_MOUSE   | Glucose-6-phosphate isomerase                              | 12.68 | 12.06 | 12.37 |
| Hsp90b1  | Q3UAD6_MOUSE | Heat shock protein 90kDa beta (Grp94), member 1            | 9     | 15.23 | 12.12 |
| Lman2    | LMAN2_MOUSE  | Vesicular integral-membrane                                | 14.76 | 9.46  | 12.11 |

|         |              |                                                                          |       |       |       |
|---------|--------------|--------------------------------------------------------------------------|-------|-------|-------|
|         |              | protein VIP36                                                            |       |       |       |
| Dpp3    | DPP3_MOUSE   | Dipeptidyl peptidase 3                                                   | 12.46 | 11.62 | 12.04 |
| Cst3    | A2APX2_MOUSE | Cystatin-C                                                               | 9.78  | 14.23 | 12    |
| Fermt3  | URP2_MOUSE   | Fermitin family homolog 3                                                | 7.3   | 16.46 | 11.88 |
| Ahnak2  | E9PYB0_MOUSE | Protein Ahnak2                                                           | 22.4  | 1.35  | 11.87 |
| Ywhag   | A8IP69_MOUSE | 14-3-3 protein gamma subtype                                             | 12    | 11.71 | 11.85 |
| Grb2    | Q3U5I5_MOUSE | Growth factor receptor bound protein 2, isoform CRA_b                    | 9.8   | 13.88 | 11.84 |
| Spn     | Q544C5_MOUSE | MCG145268, isoform CRA_a                                                 | 6.69  | 16.94 | 11.82 |
| Psm2    | PSA2_MOUSE   | Proteasome subunit alpha type-2                                          | 11.17 | 12.44 | 11.81 |
| Pnp     | PNPH_MOUSE   | Purine nucleoside phosphorylase                                          | 10.09 | 13.51 | 11.8  |
| Pgls    | 6PGL_MOUSE   | 6-phosphogluconolactonase                                                | 13.9  | 9.61  | 11.75 |
| IGHE    | IGHE_MOUSE   | Ig epsilon chain C region                                                | 14.27 | 8.93  | 11.6  |
| Rhoa    | Q4VAE6_MOUSE | Ras family member A                                                      | 9.44  | 13.57 | 11.51 |
| Itm2c   | ITM2C_MOUSE  | Integral membrane protein 2C                                             | 1.69  | 21.27 | 11.48 |
| Anxa5   | ANXA5_MOUSE  | Annexin A5                                                               | 5.89  | 16.9  | 11.4  |
| Pgd     | A2AH73_MOUSE | 6-phosphogluconate dehydrogenase, decarboxylating                        | 3.37  | 19.42 | 11.39 |
| Akr1b3  | Q3UDY1_MOUSE | MCG6067, isoform CRA_b                                                   | 8.3   | 14.43 | 11.37 |
| Csf2rb  | IL3RB_MOUSE  | Cytokine receptor common subunit beta                                    | 3.06  | 19.57 | 11.32 |
| Lamp2   | LAMP2_MOUSE  | Lysosome-associated membrane glycoprotein 2                              | 13.13 | 9.16  | 11.14 |
| Itgb1   | ITB1_MOUSE   | Integrin beta-1                                                          | 10.86 | 11.37 | 11.12 |
| Ctla2a  | CTL2A_MOUSE  | Protein CTLA-2-alpha                                                     | 13.64 | 8.5   | 11.07 |
| Fasn    | FAS_MOUSE    | Fatty acid synthase                                                      | 12.28 | 9.29  | 10.79 |
| Rplp0   | Q5M8R8_MOUSE | Ribosomal protein, large, P0                                             | 13.45 | 7.81  | 10.63 |
| Cotl1   | Q544F6_MOUSE | Cotl1 protein                                                            | 8.34  | 12.82 | 10.58 |
| Uba52   | Q66JP1_MOUSE | MCG23116, isoform CRA_a                                                  | 11.12 | 9.71  | 10.41 |
| Fam129a | NIBAN_MOUSE  | Protein Niban                                                            | 8.41  | 12.26 | 10.34 |
| Nampt   | NAMPT_MOUSE  | Nicotinamide phosphoribosyltransferase                                   | 4.45  | 16.11 | 10.28 |
| Furin   | FURIN_MOUSE  | Furin                                                                    | 11.71 | 8.8   | 10.25 |
| Rac1    | RAC1_MOUSE   | Ras-related C3 botulinum toxin substrate 1                               | 11.12 | 9.31  | 10.22 |
| Eml2    | EMAL2_MOUSE  | Echinoderm microtubule-associated protein-like 2                         | 6.93  | 13.38 | 10.15 |
| Actbl2  | ACTBL_MOUSE  | Beta-actin-like protein 2                                                | 9.28  | 10.92 | 10.1  |
| Gba     | GLCM_MOUSE   | Glucosylceramidase                                                       | 7.48  | 12.68 | 10.08 |
| Myh10   | MYH10_MOUSE  | Myosin-10                                                                | 6.71  | 13.38 | 10.05 |
| Idh1    | IDHC_MOUSE   | Isocitrate dehydrogenase [NADP] cytoplasmic                              | 3.37  | 16.57 | 9.97  |
| Atp1b3  | Q544Q7_MOUSE | ATPase, Na <sup>+</sup> /K <sup>+</sup> transporting, beta 3 polypeptide | 8.67  | 11.05 | 9.86  |
| Ncug1   | NCUG1_MOUSE  | Lysosomal protein NCU-G1                                                 | 11.13 | 8.49  | 9.81  |

|          |              |                                                                |       |       |      |
|----------|--------------|----------------------------------------------------------------|-------|-------|------|
| Gnai2    | GNAI2_MOUSE  | Guanine nucleotide-binding protein G(i) subunit alpha-2        | 4.95  | 14.58 | 9.76 |
| Laptm5   | Q544S4_MOUSE | CLAST6                                                         | 5.24  | 14.15 | 9.7  |
| Got1     | AATC_MOUSE   | Aspartate aminotransferase, cytoplasmic                        | 14.83 | 4.47  | 9.65 |
| Aco2     | ACON_MOUSE   | Aconitate hydratase, mitochondrial                             | 1.1   | 17.9  | 9.5  |
| Ddb1     | DDB1_MOUSE   | DNA damage-binding protein 1                                   | 7.22  | 11.72 | 9.47 |
| Psm6     | PSA6_MOUSE   | Proteasome subunit alpha type-6                                | 8.92  | 9.88  | 9.4  |
| Npl      | NPL_MOUSE    | N-acetylneuraminase lyase                                      | 2.24  | 16.48 | 9.36 |
| Sh3bgr13 | SH3L3_MOUSE  | SH3 domain-binding glutamic acid-rich-like protein 3           | 11.68 | 7.02  | 9.35 |
| Arsb     | ARSB_MOUSE   | Arylsulfatase B                                                | 5     | 13.54 | 9.27 |
| Gapdhs   | G3PT_MOUSE   | Glyceraldehyde-3-phosphate dehydrogenase, testis-specific      | 9.47  | 9.06  | 9.26 |
| Rpl5     | Q58EU6_MOUSE | MCG13589                                                       | 11.66 | 6.73  | 9.2  |
| Ahcy     | Q3TF14_MOUSE | Adenosylhomocysteinase                                         | 8.93  | 9.42  | 9.18 |
| Park7    | PARK7_MOUSE  | Protein DJ-1                                                   | 8.67  | 9.57  | 9.12 |
| Rpl12    | Q5BLK0_MOUSE | MCG18564, isoform CRA_a                                        | 13.05 | 4.87  | 8.96 |
| Ms4a2    | B2RTF7_MOUSE | Membrane-spanning 4-domains, subfamily A, member 2             | 5.88  | 12    | 8.94 |
| Rac2     | RAC2_MOUSE   | Ras-related C3 botulinum toxin substrate 2                     | 6.93  | 10.92 | 8.92 |
| P2rx7    | Q8CHP4_MOUSE | P2X purinoceptor                                               | 2.55  | 15.26 | 8.91 |
| G6pdx    | Q790Y8_MOUSE | Glucose-6-phosphate 1-dehydrogenase                            | 3.34  | 14.47 | 8.91 |
| Idua     | IDUA_MOUSE   | Alpha-L-iduronidase                                            | 5.34  | 12.42 | 8.88 |
| Akr1a1   | Q540D7_MOUSE | Aldehyde reductase                                             | 8.44  | 9.31  | 8.88 |
| Adam10   | ADA10_MOUSE  | Disintegrin and metalloproteinase domain-containing protein 10 | 6.64  | 11.08 | 8.86 |
| Tubb2a   | TBB2A_MOUSE  | Tubulin beta-2A chain                                          | 7.84  | 9.82  | 8.83 |
| Anxa11   | ANX11_MOUSE  | Annexin A11                                                    | 6.14  | 11.45 | 8.8  |
| Pecam1   | PECA1_MOUSE  | Platelet endothelial cell adhesion molecule                    | 11.42 | 5.95  | 8.68 |
| Tpt1     | TCTP_MOUSE   | Translationally-controlled tumor protein                       | 13.16 | 4.19  | 8.67 |
| Rpl7a    | Q58ET1_MOUSE | MCG11348                                                       | 10.35 | 6.86  | 8.61 |
| Ezr      | Q4KML7_MOUSE | Ezrin                                                          | 2.79  | 14.4  | 8.6  |
| Galns    | GALNS_MOUSE  | N-acetylgalactosamine-6-sulfatase                              | 9.21  | 7.95  | 8.58 |
| Snap23   | A2AKH4_MOUSE | Synaptosomal-associated protein                                | 4.21  | 12.93 | 8.57 |
| Gnb1     | Q3TQ70_MOUSE | Beta1 subunit of GTP-binding protein                           | 3.66  | 13.23 | 8.45 |
| Slc7a5   | LAT1_MOUSE   | Large neutral amino acids transporter small subunit 1          | 11.45 | 5.4   | 8.42 |
| Inpp5d   | SHIP1_MOUSE  | Phosphatidylinositol 3,4,5-trisphosphate 5-phosphatase 1       | 9.82  | 7     | 8.41 |

|        |              |                                                                        |       |       |      |
|--------|--------------|------------------------------------------------------------------------|-------|-------|------|
| Ywhah  | I433F_MOUSE  | 14-3-3 protein eta                                                     | 6.87  | 9.84  | 8.36 |
| Gnb2l1 | GBLP_MOUSE   | Guanine nucleotide-binding protein subunit beta-2-like 1               | 7.79  | 8.77  | 8.28 |
| Anxa1  | Q4FJV4_MOUSE | Annexin                                                                | 2.24  | 14.23 | 8.24 |
| Rps3   | Q5YLW3_MOUSE | Ribosomal protein S3                                                   | 6.68  | 9.75  | 8.22 |
| Rplp2  | RLA2_MOUSE   | 60S acidic ribosomal protein P2                                        | 11.72 | 4.71  | 8.22 |
| Pdia6  | PDIA6_MOUSE  | Protein disulfide-isomerase A6                                         | 9.8   | 6.62  | 8.21 |
| Actg1  | Q9QZ83_MOUSE | Gamma actin-like protein                                               | 7.47  | 8.94  | 8.21 |
| Capza2 | Q5DQJ3_MOUSE | Capping protein (Actin filament) muscle Z-line, alpha 2, isoform CRA_c | 8.33  | 8.08  | 8.2  |
| Prdx5  | PRDX5_MOUSE  | Peroxiredoxin-5, mitochondrial                                         | 6.02  | 10.36 | 8.19 |
| CP054  | CP054_MOUSE  | Transmembrane protein C16orf54 homolog                                 | 8.43  | 7.84  | 8.13 |
| Csf1   | CSF1_MOUSE   | Macrophage colony-stimulating factor 1                                 | 8.67  | 7.57  | 8.12 |
| Nagpa  | NAGPA_MOUSE  | N-acetylglucosamine-1-phosphodiester alpha-N-acetylglucosaminidase     | 6.74  | 9.28  | 8.01 |
| Actn1  | ACTN1_MOUSE  | Alpha-actinin-1                                                        | 6.11  | 9.82  | 7.97 |
| Actr3  | Q3ULF7_MOUSE | Actr3 protein                                                          | 3.6   | 12.29 | 7.95 |
| Myadm  | Q0VE46_MOUSE | Myadm protein                                                          | 4.15  | 11.72 | 7.94 |
| Rplp1  | Q58E35_MOUSE | MCG10168                                                               | 10.88 | 5     | 7.94 |
| Scamp3 | SCAM3_MOUSE  | Secretory carrier-associated membrane protein 3                        | 5.3   | 10.53 | 7.91 |
| Rab44  | RAB44_MOUSE  | Ras-related protein Rab-44                                             | 10.85 | 4.98  | 7.91 |
| Ftl1   | FRIL1_MOUSE  | Ferritin light chain 1                                                 | 10    | 5.8   | 7.9  |
| Mvp    | MVP_MOUSE    | Major vault protein                                                    | 5.11  | 10.53 | 7.82 |
| Nqo2   | NQO2_MOUSE   | Ribosyldihyronicotinamide dehydrogenase [quinone]                      | 4.72  | 10.91 | 7.82 |
| Prdx2  | PRDX2_MOUSE  | Peroxiredoxin-2                                                        | 6.96  | 8.66  | 7.81 |
| Psmal1 | Q3TS44_MOUSE | Proteasome subunit alpha type                                          | 5.85  | 9.73  | 7.79 |
| Rpl7   | Q5M9N8_MOUSE | Ribosomal protein L7                                                   | 9.46  | 6.05  | 7.76 |
| Gnb2   | Q3U9V4_MOUSE | Guanine nucleotide binding protein, beta 2, isoform CRA_a              | 4.41  | 11.1  | 7.76 |
| Rpl6   | Q3UCH0_MOUSE | 60S ribosomal protein L6                                               | 8.95  | 6.48  | 7.71 |
| Ncstn  | NICA_MOUSE   | Nicastrin                                                              | 7.57  | 7.66  | 7.62 |
| Prdx3  | PRDX3_MOUSE  | Thioredoxin-dependent peroxide reductase, mitochondrial                | 7.26  | 7.94  | 7.6  |
| Rpl4   | Q564E8_MOUSE | Ribosomal protein L4                                                   | 8.59  | 6.58  | 7.59 |
| Enpp4  | B8JJY5_MOUSE | Ectonucleotide pyrophosphatase/phosphodiesterase family member 4       | 10.84 | 4.33  | 7.58 |
| Cfp    | A2AE15_MOUSE | Complement factor properdin                                            | 1.95  | 13.22 | 7.58 |
| Ppib   | Q9DCY1_MOUSE | Peptidyl-prolyl cis-trans isomerase                                    | 3.9   | 11.2  | 7.55 |

|          |              |                                                                                   |       |       |      |
|----------|--------------|-----------------------------------------------------------------------------------|-------|-------|------|
| Gyg      | Q3TWR9_MOUSE | Glycogenin, isoform CRA_a                                                         | 14.01 | 1.07  | 7.54 |
| Ppp2r1a  | 2AAA_MOUSE   | Serine/threonine-protein phosphatase 2A 65 kDa regulatory subunit A alpha isoform | 8.85  | 6.17  | 7.51 |
| Tmsb4x   | TYB4_MOUSE   | Thymosin beta-4                                                                   | 8.91  | 6.08  | 7.5  |
| Gsr      | GSHR_MOUSE   | Glutathione reductase, mitochondrial                                              | 4.72  | 10.23 | 7.47 |
| Plek     | Q5F271_MOUSE | Pleckstrin                                                                        | 7.81  | 7.14  | 7.47 |
| Ank      | Q3UG85_MOUSE | Progressive ankylosis                                                             | 3.37  | 11.35 | 7.36 |
| Lif      | Q5SQP3_MOUSE | Leukemia inhibitory factor                                                        | 4.17  | 10.53 | 7.35 |
| Adh5     | Q6P5I3_MOUSE | Alcohol dehydrogenase 5 (Class III), chi polypeptide                              | 6.68  | 7.96  | 7.32 |
| Hspa1a   | Q3TU85_MOUSE | Heat shock protein 1B                                                             | 4.43  | 10.2  | 7.31 |
| Siae     | SIAE_MOUSE   | Sialate O-acetyltransferase                                                       | 8.96  | 5.54  | 7.25 |
| Ptma     | Q0VGU2_MOUSE | Prothymosin alpha                                                                 | 6.96  | 7.44  | 7.2  |
| Ath1l    | ATH1L_MOUSE  | Acid trehalase-like protein 1                                                     | 7.19  | 7.13  | 7.16 |
| Eif5a    | IF5A1_MOUSE  | Eukaryotic translation initiation factor 5A-1                                     | 6.95  | 7.28  | 7.11 |
| Arpc1b   | ARC1B_MOUSE  | Actin-related protein 2/3 complex subunit 1B                                      | 3.03  | 11.18 | 7.11 |
| Itga2b   | ITA2B_MOUSE  | Integrin alpha-Iib                                                                | 3.63  | 10.52 | 7.08 |
| Tspan13  | TSN13_MOUSE  | Tetraspanin-13                                                                    | 8.7   | 5.41  | 7.05 |
| Rtn4     | RTN4_MOUSE   | Reticulon-4                                                                       | 11.42 | 2.67  | 7.05 |
| Cat      | CATA_MOUSE   | Catalase                                                                          | 1.68  | 12.27 | 6.98 |
| Slc9a3r1 | Q3TG37_MOUSE | Putative uncharacterized protein                                                  | 9.2   | 4.71  | 6.96 |
| Rpsa     | RSSA_MOUSE   | 40S ribosomal protein SA                                                          | 3.04  | 10.79 | 6.91 |
| Ifitm2   | IFM2_MOUSE   | Interferon-induced transmembrane protein 2                                        | 1.66  | 12.13 | 6.9  |
| Rnf130   | GOLI_MOUSE   | E3 ubiquitin-protein ligase RNF130                                                | 1.97  | 11.59 | 6.78 |
| HVM17    | HVM17_MOUSE  | Ig heavy chain V region MOPC 47A                                                  | 9.24  | 4.31  | 6.77 |
| Glod4    | GLOD4_MOUSE  | Glyoxalase domain-containing protein 4                                            | 7.01  | 6.48  | 6.75 |
| Rps8     | Q497E9_MOUSE | 40S ribosomal protein S8                                                          | 6.44  | 7.02  | 6.73 |
| Arf1     | ARF1_MOUSE   | ADP-ribosylation factor 1                                                         | 3.34  | 10.1  | 6.72 |
| Igf2r    | MPRI_MOUSE   | Cation-independent mannose-6-phosphate receptor                                   | 11.34 | 2.05  | 6.69 |
| Nme2     | Q5NC82_MOUSE | Nucleoside diphosphate kinase                                                     | 8.11  | 5.11  | 6.61 |
| Itgb3    | ITB3_MOUSE   | Integrin beta-3                                                                   | 1.67  | 11.47 | 6.57 |
| Ttyh2    | TTYH2_MOUSE  | Protein tweety homolog 2                                                          | 11.1  | 2.02  | 6.56 |
| Myh11    | MYH11_MOUSE  | Myosin-11                                                                         | 7.55  | 5.55  | 6.55 |
| Oat      | Q3TG75_MOUSE | Ornithine aminotransferase, isoform CRA_b                                         | 5.89  | 7.15  | 6.52 |
| Slc6a6   | Q3UPI8_MOUSE | Transporter                                                                       | 7.32  | 5.66  | 6.49 |
| Rpl18    | Q58EW0_MOUSE | 60S ribosomal protein L18                                                         | 6.36  | 6.5   | 6.43 |

|          |              |                                                                         |       |       |      |
|----------|--------------|-------------------------------------------------------------------------|-------|-------|------|
| Tmem106b | T106B_MOUSE  | Transmembrane protein 106B                                              | 3.67  | 9.19  | 6.43 |
| Hspd1    | CH60_MOUSE   | 60 kDa heat shock protein, mitochondrial                                | 4.19  | 8.65  | 6.42 |
| Psmb4    | PSB4_MOUSE   | Proteasome subunit beta type-4                                          | 4.71  | 8.11  | 6.41 |
| Lilrb4   | LIRB4_MOUSE  | Leukocyte immunoglobulin-like receptor subfamily B member 4             | 3.37  | 9.44  | 6.4  |
| Chmp4b   | CHM4B_MOUSE  | Charged multivesicular body protein 4b                                  | 9.8   | 2.95  | 6.37 |
| Rap1a    | RAP1A_MOUSE  | Ras-related protein Rap-1A                                              | 4.48  | 8.07  | 6.28 |
| Dcps     | DCPS_MOUSE   | m7GpppX diphosphatase                                                   | 8.93  | 3.61  | 6.27 |
| Atic     | PUR9_MOUSE   | Bifunctional purine biosynthesis protein PURH                           | 8.05  | 4.45  | 6.25 |
| Anp32a   | AN32A_MOUSE  | Acidic leucine-rich nuclear phosphoprotein 32 family member A           | 10.06 | 2.44  | 6.25 |
| H2-Q10   | HA10_MOUSE   | H-2 class I histocompatibility antigen, Q10 alpha chain                 | 9.98  | 2.45  | 6.22 |
| Trpv2    | TRPV2_MOUSE  | Transient receptor potential cation channel subfamily V member 2        | 1.69  | 10.67 | 6.18 |
| Eif6     | Q545K4_MOUSE | Eukaryotic translation initiation factor 6                              | 8.44  | 3.9   | 6.17 |
| Ppt1     | Q3U6J9_MOUSE | Palmitoyl-protein thioesterase 1                                        | 2.8   | 9.53  | 6.17 |
| Sh3bgrl  | SH3L1_MOUSE  | SH3 domain-binding glutamic acid-rich-like protein                      | 8.13  | 4.19  | 6.16 |
| Ptpn6    | PTN6_MOUSE   | Tyrosine-protein phosphatase non-receptor type 6                        | 1.95  | 10.27 | 6.11 |
| Ppp1ca   | PP1A_MOUSE   | Serine/threonine-protein phosphatase PP1-alpha catalytic subunit        | 6.44  | 5.77  | 6.1  |
| Emb      | EMB_MOUSE    | Embigin                                                                 | 4.49  | 7.69  | 6.09 |
| Ppp2ca   | PP2AA_MOUSE  | Serine/threonine-protein phosphatase 2A catalytic subunit alpha isoform | 7.77  | 4.4   | 6.09 |
| Mtpn     | MTPN_MOUSE   | Myotrophin                                                              | 7.83  | 4.34  | 6.08 |
| Rab10    | Q4FJL0_MOUSE | RAB10, member RAS oncogene family                                       | 7.02  | 5.14  | 6.08 |
| Nedd4    | B2RSC8_MOUSE | E3 ubiquitin-protein ligase                                             | 3.34  | 8.81  | 6.08 |
| Pygl     | PYGL_MOUSE   | Glycogen phosphorylase, liver form                                      | 2.78  | 9.32  | 6.05 |
| Ube2l3   | UBC7_MOUSE   | Ubiquitin-conjugating enzyme E2 L3                                      | 3.62  | 8.48  | 6.05 |
| Psmb8    | PSB8_MOUSE   | Proteasome subunit beta type-8                                          | 3.95  | 8.1   | 6.02 |
| Ptgr2    | PTGR2_MOUSE  | Prostaglandin reductase 2                                               | 9.38  | 2.59  | 5.99 |
| Gnai1    | GNAI1_MOUSE  | Guanine nucleotide-binding protein G(i) subunit alpha-1                 | 3.88  | 8.08  | 5.98 |
| Myl6     | MYL6_MOUSE   | Myosin light polypeptide 6                                              | 1.91  | 9.98  | 5.95 |

|          |              |                                                               |      |      |      |
|----------|--------------|---------------------------------------------------------------|------|------|------|
| Por      | NCPR_MOUSE   | NADPH--cytochrome P450 reductase                              | 5.81 | 6.08 | 5.94 |
| Impa1    | IMPA1_MOUSE  | Inositol monophosphatase 1                                    | 7.27 | 4.59 | 5.93 |
| Prkcb    | KPCB_MOUSE   | Protein kinase C beta type                                    | 7.32 | 4.48 | 5.9  |
| Psmc1    | Q5HZK3_MOUSE | Proteasome (Prosome, macropain) 28 subunit, alpha             | 6.11 | 5.65 | 5.88 |
| Rps7     | Q4FZE6_MOUSE | Ribosomal protein S7                                          | 6.1  | 5.66 | 5.88 |
| Rps18    | Q561N5_MOUSE | MCG23000, isoform CRA_b                                       | 6.73 | 4.98 | 5.86 |
| Slc2a6   | A2AR26_MOUSE | Protein Slc2a6                                                | 3.07 | 8.63 | 5.85 |
| Lyz2     | LYZ2_MOUSE   | Lysozyme C-2                                                  | 6.95 | 4.74 | 5.84 |
| Stxbp2   | Q548T0_MOUSE | Syntaxin binding protein 2, isoform CRA_e                     | 2.23 | 9.43 | 5.83 |
| Tmem104  | A2A6S0_MOUSE | Transmembrane protein 104                                     | 6.72 | 4.85 | 5.79 |
| Cd63     | Q549D0_MOUSE | Cd63 antigen                                                  | 7.5  | 4.07 | 5.78 |
| Itgb2    | ITB2_MOUSE   | Integrin beta-2                                               | 2.45 | 8.91 | 5.68 |
| Rps3a1   | Q564F3_MOUSE | MCG1128, isoform CRA_c                                        | 3.93 | 7.28 | 5.61 |
| Gnpda1   | GNPI1_MOUSE  | Glucosamine-6-phosphate isomerase 1                           | 6.12 | 4.97 | 5.55 |
| Hnrnpd   | HNRPD_MOUSE  | Heterogeneous nuclear ribonucleoprotein D0                    | 9.82 | 1.21 | 5.51 |
| Pycard   | Q54AA2_MOUSE | Apoptosis-associated speck-like protein containing CARD       | 5.3  | 5.69 | 5.49 |
| Anp32b   | AN32B_MOUSE  | Acidic leucine-rich nuclear phosphoprotein 32 family member B | 9.79 | 1.19 | 5.49 |
| Tpp2     | TPP2_MOUSE   | Tripeptidyl-peptidase 2                                       | 5.82 | 5.12 | 5.47 |
| Clec2d   | F5BFH0_MOUSE | C-type lectin domain family 2 member D                        | 1.4  | 9.54 | 5.47 |
| Rab5c    | Q3TJ39_MOUSE | RAB5C, member RAS oncogene family, isoform CRA_a              | 3.09 | 7.81 | 5.45 |
| Rpl10a   | RL10A_MOUSE  | 60S ribosomal protein L10a                                    | 6.41 | 4.44 | 5.43 |
| Crlf2    | CRLF2_MOUSE  | Cytokine receptor-like factor 2                               | 1.4  | 9.44 | 5.42 |
| Kpnb1    | IMB1_MOUSE   | Importin subunit beta-1                                       | 8.4  | 2.43 | 5.42 |
| Lyn      | Q3TCS3_MOUSE | Putative uncharacterized protein                              | 1.93 | 8.89 | 5.41 |
| Rab14    | Q50HX4_MOUSE | RAB14 protein                                                 | 2.26 | 8.5  | 5.38 |
| Txn      | A2AV97_MOUSE | Thioredoxin                                                   | 6.68 | 4.06 | 5.37 |
| Tpm3-rs7 | D3Z2H9_MOUSE | Uncharacterized protein                                       | 6.93 | 3.77 | 5.35 |
| Serinc1  | A9CLV6_MOUSE | Axotomy induced glycoprotein 2                                | 4.75 | 5.95 | 5.35 |
| Rps17    | Q5M9L7_MOUSE | MCG15301, isoform CRA_a                                       | 7.86 | 2.81 | 5.34 |
| Psmb1    | Q6RI64_MOUSE | Proteasome subunit beta type                                  | 3.63 | 6.98 | 5.31 |
| Twf2     | TWF2_MOUSE   | Twinfilin-2                                                   | 6.16 | 4.44 | 5.3  |
| A2mp     | A2MP_MOUSE   | Alpha-2-macroglobulin-P                                       | 7.39 | 3.13 | 5.26 |
| H2afy    | H2AY_MOUSE   | Core histone macro-H2A.1                                      | 1.13 | 9.16 | 5.14 |
| Mtap     | A2ANM4_MOUSE | S-methyl-5'-thioadenosine phosphorylase                       | 8.11 | 2.14 | 5.13 |

|           |              |                                                                             |      |      |      |
|-----------|--------------|-----------------------------------------------------------------------------|------|------|------|
| Pfcp      | K6PP_MOUSE   | 6-phosphofructokinase type C                                                | 1.4  | 8.78 | 5.09 |
| Pgm2      | PGM2_MOUSE   | Phosphoglucomutase-2                                                        | 4.77 | 5.41 | 5.09 |
| Havcr2    | HAVR2_MOUSE  | Hepatitis A virus cellular receptor 2 homolog                               | 3.58 | 6.6  | 5.09 |
| Tubb5     | TBB5_MOUSE   | Tubulin beta-5 chain                                                        | 6.4  | 3.77 | 5.08 |
| Tsn       | TSN_MOUSE    | Translin                                                                    | 8.41 | 1.75 | 5.08 |
| Cmpk1     | KCY_MOUSE    | UMP-CMP kinase                                                              | 1.4  | 8.75 | 5.08 |
| Fam63a    | B7ZMR0_MOUSE | Fam63a protein                                                              | 3.37 | 6.75 | 5.06 |
| Trim14    | Q14AR3_MOUSE | Tripartite motif-containing 14                                              | 5.89 | 4.19 | 5.04 |
| Vars      | Q790I0_MOUSE | Valyl-tRNA synthetase 2, isoform CRA_b                                      | 6.99 | 2.96 | 4.97 |
| Serpinb6a | Q4FJQ6_MOUSE | Serine (Or cysteine) peptidase inhibitor, clade B, member 6a, isoform CRA_a | 7.88 | 2.01 | 4.94 |
| Vamp8     | VAMP8_MOUSE  | Vesicle-associated membrane protein 8                                       | 1.66 | 8.23 | 4.94 |
| Psmb2     | A2A882_MOUSE | Proteasome subunit beta type-2                                              | 4.18 | 5.67 | 4.92 |
| Lgals9    | LEG9_MOUSE   | Galectin-9                                                                  | 5.04 | 4.74 | 4.89 |
| Rps9      | RS9_MOUSE    | 40S ribosomal protein S9                                                    | 5.88 | 3.89 | 4.88 |
| Rpl17     | RL17_MOUSE   | 60S ribosomal protein L17                                                   | 5.04 | 4.72 | 4.88 |
| Psma5     | Q3UPK6_MOUSE | Proteasome subunit alpha type                                               | 6.47 | 3.24 | 4.85 |
| Ly6a      | LY6A_MOUSE   | Lymphocyte antigen 6A-2/6E-1                                                | 3.24 | 6.46 | 4.85 |
| Rps19     | RS19_MOUSE   | 40S ribosomal protein S19                                                   | 5.59 | 4.06 | 4.82 |
| Coro1b    | A2RS22_MOUSE | Coronin                                                                     | 2.79 | 6.74 | 4.77 |
| Galm      | GALM_MOUSE   | Aldose 1-epimerase                                                          | 4.79 | 4.73 | 4.76 |
| Psma7     | Q542H2_MOUSE | Proteasome subunit alpha type                                               | 2.76 | 6.75 | 4.75 |
| Scarb2    | SCR2_MOUSE   | Lysosome membrane protein 2                                                 | 8.09 | 1.36 | 4.73 |
| Ybx1      | YB1_MOUSE    | Nuclease-sensitive element-binding protein 1                                | 7.56 | 1.89 | 4.73 |
| Renbp     | RENBP_MOUSE  | N-acylglucosamine 2-epimerase                                               | 6.13 | 3.24 | 4.69 |
| Uba1y     | UBA1Y_MOUSE  | Ubiquitin-like modifier-activating enzyme 1 Y                               | 6.94 | 2.42 | 4.68 |
| Nsf       | NSF_MOUSE    | Vesicle-fusing ATPase                                                       | 6.65 | 2.7  | 4.68 |
| Coro1c    | Q499X7_MOUSE | Coronin                                                                     | 1.95 | 7.4  | 4.67 |
| Hmgb1     | Q58EV5_MOUSE | High mobility group box 1                                                   | 3.07 | 6.21 | 4.64 |
| Ostf1     | OSTF1_MOUSE  | Osteoclast-stimulating factor 1                                             | 2.74 | 6.46 | 4.6  |
| Eef1g     | Q4FZK2_MOUSE | Eukaryotic translation elongation factor 1 gamma                            | 5.29 | 3.9  | 4.6  |
| Pilrb2    | PILB2_MOUSE  | Paired immunoglobulin-like type 2 receptor beta-2                           | 5.51 | 3.65 | 4.58 |
| Flot1     | Q540I4_MOUSE | Flotillin 1                                                                 | 1.7  | 7.44 | 4.57 |
| Atp6v0a2  | VPP2_MOUSE   | V-type proton ATPase 116 kDa subunit a isoform 2                            | 2.51 | 6.6  | 4.55 |
| Lgals3    | LEG3_MOUSE   | Galectin-3                                                                  | 3.37 | 5.69 | 4.53 |
| Eif2s2    | Q3ULL5_MOUSE | Eif2s2 protein                                                              | 7.28 | 1.77 | 4.52 |



|           |              |                                                      |      |      |      |
|-----------|--------------|------------------------------------------------------|------|------|------|
| Pafah1b1  | Q5SW18_MOUSE | Putative uncharacterized protein                     | 7.26 | 1.76 | 4.51 |
| Rnf13     | RNF13_MOUSE  | E3 ubiquitin-protein ligase RNF13                    | 5.02 | 3.91 | 4.47 |
| Plscr1    | PLS1_MOUSE   | Phospholipid scramblase 1                            | 2.29 | 6.61 | 4.45 |
| Gsto1     | GSTO1_MOUSE  | Glutathione S-transferase omega-1                    | 3.89 | 5    | 4.44 |
| Rab8b     | Q0PD49_MOUSE | RAB8B, member RAS oncogene family                    | 6.23 | 2.57 | 4.4  |
| Slc1a5    | AAAT_MOUSE   | Neutral amino acid transporter B(0)                  | 2.79 | 5.93 | 4.36 |
| Ube2n     | UBCN_MOUSE   | Ubiquitin-conjugating enzyme E2 N                    | 4.41 | 4.31 | 4.36 |
| Rhog      | Q3UDZ1_MOUSE | Ras homolog gene family, member G                    | 4.14 | 4.58 | 4.36 |
| Hist1h3a  | H31_MOUSE    | Histone H3.1                                         | 1.66 | 7.03 | 4.35 |
| Fam49b    | FA49B_MOUSE  | Protein FAM49B                                       | 3.9  | 4.74 | 4.32 |
| Stip1     | STI1_MOUSE   | Stress-induced-phosphoprotein 1                      | 3.06 | 5.52 | 4.29 |
| Cd93      | C1QR1_MOUSE  | Complement component C1q receptor                    | 3.07 | 5.5  | 4.29 |
| Lmnbl     | LMNB1_MOUSE  | Lamin-B1                                             | 2.74 | 5.78 | 4.26 |
| Rab5a     | RAB5A_MOUSE  | Ras-related protein Rab-5A                           | 2.48 | 5.96 | 4.22 |
| Rnaset2   | Q5FWA0_MOUSE | Ribonuclease T2B                                     | 6.36 | 2.03 | 4.2  |
| Osm       | ONCM_MOUSE   | Oncostatin-M                                         | 1.07 | 7.28 | 4.17 |
| Ndrp1     | Q545R3_MOUSE | N-myc downstream regulated gene 1                    | 2.23 | 6.09 | 4.16 |
| Cd99      | CD99_MOUSE   | CD99 antigen                                         | 4.78 | 3.5  | 4.14 |
| Vps37b    | VP37B_MOUSE  | Vacuolar protein sorting-associated protein 37B      | 4.49 | 3.79 | 4.14 |
| Ifi30     | GILT_MOUSE   | Gamma-interferon-inducible lysosomal thiol reductase | 1.4  | 6.85 | 4.12 |
| G6pd2     | A0FF38_MOUSE | Glucose-6-phosphate 1-dehydrogenase                  | 4.25 | 3.94 | 4.09 |
| Plec      | PLEC_MOUSE   | Plectin                                              | 3.89 | 4.27 | 4.08 |
| Asl       | ARLY_MOUSE   | Argininosuccinate lyase                              | 1.95 | 6.19 | 4.07 |
| Esyt1     | ESYT1_MOUSE  | Extended synaptotagmin-1                             | 1.4  | 6.7  | 4.05 |
| Eno3      | Q5SX58_MOUSE | Beta-enolase                                         | 2.23 | 5.82 | 4.03 |
| Got2      | AATM_MOUSE   | Aspartate aminotransferase, mitochondrial            | 1.14 | 6.91 | 4.02 |
| Rps14     | RS14_MOUSE   | 40S ribosomal protein S14                            | 6.14 | 1.9  | 4.02 |
| Rpl14     | RL14_MOUSE   | 60S ribosomal protein L14                            | 4.49 | 3.53 | 4.01 |
| Tom1      | Q561M4_MOUSE | Target of myb1 homolog (Chicken)                     | 5.05 | 2.97 | 4.01 |
| Hnrnpa2b1 | ROA2_MOUSE   | Heterogeneous nuclear ribonucleoproteins A2/B1       | 3.09 | 4.88 | 3.99 |
| Ostm1     | OSTM1_MOUSE  | Osteopetrosis-associated transmembrane protein 1     | 4.99 | 2.97 | 3.98 |
| Sod2      | Q4FJX9_MOUSE | Superoxide dismutase                                 | 2.49 | 5.42 | 3.96 |
| Ankfy1    | ANFY1_MOUSE  | Ankyrin repeat and FYVE domain-containing protein 1  | 2.78 | 5.12 | 3.95 |
| Clta      | CLCA_MOUSE   | Clathrin light chain A                               | 5.56 | 2.3  | 3.93 |

|           |              |                                                                             |      |      |      |
|-----------|--------------|-----------------------------------------------------------------------------|------|------|------|
| Hdgf      | HDGF_MOUSE   | Hepatoma-derived growth factor                                              | 4.45 | 3.37 | 3.91 |
| Stx7      | STX7_MOUSE   | Syntaxin-7                                                                  | 3.08 | 4.72 | 3.9  |
| Rpl15     | Q5M8Q0_MOUSE | Ribosomal protein L15                                                       | 4.19 | 3.61 | 3.9  |
| Txndc17   | TXD17_MOUSE  | Thioredoxin domain-containing protein 17                                    | 3.89 | 3.89 | 3.89 |
| Arpc5     | ARPC5_MOUSE  | Actin-related protein 2/3 complex subunit 5                                 | 5.33 | 2.44 | 3.88 |
| Tars      | SYTC_MOUSE   | Threonine--tRNA ligase, cytoplasmic                                         | 1.36 | 6.19 | 3.78 |
| Atox1     | ATOX1_MOUSE  | Copper transport protein ATOX1                                              | 2.53 | 4.99 | 3.76 |
| Nedd8     | Q3UI46_MOUSE | Neural cell expressed, developmentally down-regulated gene 8, isoform CRA_a | 4.4  | 3.12 | 3.76 |
| Asah1     | Q78P93_MOUSE | Acid ceramidase                                                             | 1.11 | 6.34 | 3.72 |
| Calu      | Q3TUF3_MOUSE | Calumenin, isoform CRA_a                                                    | 4.71 | 2.7  | 3.7  |
| Syk       | Q3UPF7_MOUSE | Tyrosine-protein kinase                                                     | 5.89 | 1.5  | 3.69 |
| M6pr      | Q3UKQ5_MOUSE | Mannose-6-phosphate receptor, cation dependent, isoform CRA_a               | 1.12 | 6.24 | 3.68 |
| Idi1      | IDI1_MOUSE   | Isopentenyl-diphosphate Delta-isomerase 1                                   | 3.86 | 3.49 | 3.68 |
| Hcls1     | HCLS1_MOUSE  | Hematopoietic lineage cell-specific protein                                 | 1.37 | 5.95 | 3.66 |
| Csf1r     | Q0P635_MOUSE | Colony stimulating factor 1 receptor                                        | 3.92 | 3.37 | 3.64 |
| Hprt1     | B1B0W8_MOUSE | Hypoxanthine-guanine phosphoribosyltransferase                              | 4.15 | 3.1  | 3.63 |
| Sri       | SORCN_MOUSE  | Sorcin                                                                      | 4.7  | 2.55 | 3.63 |
| Rab1b     | Q0PD66_MOUSE | RAB1B, member RAS oncogene family, isoform CRA_c                            | 2.24 | 5    | 3.62 |
| Cd53      | Q3U0W1_MOUSE | CD53 antigen, isoform CRA_b                                                 | 3.89 | 3.36 | 3.62 |
| Atp6v0d1  | VA0D_MOUSE   | V-type proton ATPase subunit d 1                                            | 3.33 | 3.91 | 3.62 |
| Gabarapl2 | GBRL2_MOUSE  | Gamma-aminobutyric acid receptor-associated protein-like 2                  | 1.95 | 5.28 | 3.61 |
| Fam129b   | NIBL1_MOUSE  | Niban-like protein 1                                                        | 3.82 | 3.37 | 3.59 |
| Gmfb      | GMFB_MOUSE   | Glia maturation factor beta                                                 | 5.03 | 2.15 | 3.59 |
| Bsg       | BASI_MOUSE   | Basigin                                                                     | 4.72 | 2.43 | 3.58 |
| Eef1d     | EF1D_MOUSE   | Elongation factor 1-delta                                                   | 4.73 | 2.41 | 3.57 |
| Qdpr      | DHPR_MOUSE   | Dihydropteridine reductase                                                  | 3.63 | 3.5  | 3.56 |
| Arl8b     | ARL8B_MOUSE  | ADP-ribosylation factor-like protein 8B                                     | 1.4  | 5.71 | 3.55 |
| Ptms      | PTMS_MOUSE   | Parathyrosin                                                                | 1.95 | 5.13 | 3.54 |
| Emilin2   | Q3U1J9_MOUSE | Elastin microfibril interfacier 2                                           | 1.14 | 5.93 | 3.53 |
| Rpl19     | Q5I0T8_MOUSE | Ribosomal protein L19                                                       | 5.03 | 2.02 | 3.53 |
| Vps29     | VP29_MOUSE   | Vacuolar protein sorting-associated protein 29                              | 4.43 | 2.57 | 3.5  |
| Set       | Q3T9S3_MOUSE | SET translocation                                                           | 3.49 | 3.51 | 3.5  |

|          |              |                                                                                      |      |      |      |
|----------|--------------|--------------------------------------------------------------------------------------|------|------|------|
| Tpm4     | TPM4_MOUSE   | Tropomyosin alpha-4 chain                                                            | 1.96 | 5    | 3.48 |
| Xpnpep1  | Q3UKF5_MOUSE | X-prolyl aminopeptidase                                                              | 3.92 | 2.98 | 3.45 |
| Apoa1bp  | NNRE_MOUSE   | NAD(P)H-hydrate epimerase                                                            | 3.93 | 2.96 | 3.45 |
| Nutf2    | NTF2_MOUSE   | Nuclear transport factor 2                                                           | 4.71 | 2.14 | 3.43 |
| Hnrnpa3  | Q5FB19_MOUSE | Heterogeneous nuclear ribonucleoprotein A3                                           | 4.98 | 1.87 | 3.42 |
| Zyx      | ZYX_MOUSE    | Zyxin                                                                                | 3.86 | 2.95 | 3.41 |
| Mroh1    | D3Z624_MOUSE | Protein Mroh1                                                                        | 4.75 | 2.02 | 3.39 |
| Stmn1    | Q545B6_MOUSE | Stathmin                                                                             | 5.56 | 1.21 | 3.38 |
| Rab27b   | Q549X4_MOUSE | RAB27b, member RAS oncogene family, isoform CRA_a                                    | 1.94 | 4.82 | 3.38 |
| Eef1b    | EF1B_MOUSE   | Elongation factor 1-beta                                                             | 3.93 | 2.83 | 3.38 |
| Cd55     | DAF1_MOUSE   | Complement decay-accelerating factor, GPI-anchored                                   | 2.25 | 4.47 | 3.36 |
| Rpl3     | RL3_MOUSE    | 60S ribosomal protein L3                                                             | 3.07 | 3.63 | 3.35 |
| Atp6v1g1 | VAG1_MOUSE   | V-type proton ATPase subunit G 1                                                     | 3.05 | 3.65 | 3.35 |
| Psmb3    | Q545G0_MOUSE | Proteasome subunit beta type                                                         | 2.22 | 4.47 | 3.34 |
| Psm4     | PSA4_MOUSE   | Proteasome subunit alpha type-4                                                      | 1.96 | 4.72 | 3.34 |
| Arl8a    | ARL8A_MOUSE  | ADP-ribosylation factor-like protein 8A                                              | 1.97 | 4.69 | 3.33 |
| Arpc4    | ARPC4_MOUSE  | Actin-related protein 2/3 complex subunit 4                                          | 1.39 | 5.27 | 3.33 |
| Slc16a3  | Q3UDP9_MOUSE | Solute carrier family 16 (Monocarboxylic acid transporters), member 3, isoform CRA_a | 2.84 | 3.79 | 3.31 |
| Cyfp1    | CYFP1_MOUSE  | Cytoplasmic FMR1-interacting protein 1                                               | 1.1  | 5.52 | 3.31 |
| Tpsab1   | A1Z090_MOUSE | Mast cell-restricted serine protease 7                                               | 5.25 | 1.34 | 3.3  |
| Erap1    | ERAP1_MOUSE  | Endoplasmic reticulum aminopeptidase 1                                               | 2.83 | 3.76 | 3.29 |
| Blvra    | A2ASB2_MOUSE | Biliverdin reductase A                                                               | 2.78 | 3.77 | 3.28 |
| Pttglip  | PTTG_MOUSE   | Pituitary tumor-transforming gene 1 protein-interacting protein                      | 3.36 | 3.11 | 3.23 |
| Ctso     | CATO_MOUSE   | Cathepsin O                                                                          | 2.78 | 3.64 | 3.21 |
| Gp49a    | Q549E3_MOUSE | Gp49A                                                                                | 2.22 | 4.18 | 3.2  |
| Coro7    | CORO7_MOUSE  | Coronin-7                                                                            | 3.64 | 2.7  | 3.17 |
| Anxa4    | ANXA4_MOUSE  | Annexin A4                                                                           | 3.34 | 2.98 | 3.16 |
| Enah     | ENAH_MOUSE   | Protein enabled homolog                                                              | 2.81 | 3.51 | 3.16 |
| Actr2    | Q5SW83_MOUSE | ARP2 actin-related protein 2 homolog (Yeast)                                         | 3.08 | 3.23 | 3.16 |
| Psm8     | PSA7L_MOUSE  | Proteasome subunit alpha type-7-like                                                 | 2.53 | 3.78 | 3.15 |
| Atp6v1a  | VATA_MOUSE   | V-type proton ATPase catalytic subunit A                                             | 2.22 | 4.03 | 3.13 |

|          |              |                                                                      |      |      |      |
|----------|--------------|----------------------------------------------------------------------|------|------|------|
| Cd200r1  | MO2R1_MOUSE  | Cell surface glycoprotein CD200 receptor 1                           | 3.9  | 2.29 | 3.1  |
| H2-K1    | Q7JJ15_MOUSE | H2K1(B)                                                              | 2.81 | 3.39 | 3.1  |
| Vti1b    | VT1B_MOUSE   | Vesicle transport through interaction with t-SNAREs homolog 1B       | 2.26 | 3.92 | 3.09 |
| Naaa     | NAAA_MOUSE   | N-acylethanolamine-hydrolyzing acid amidase                          | 3.08 | 3.1  | 3.09 |
| Cct8     | Q3UL22_MOUSE | Chaperonin subunit 8 (Theta), isoform CRA_a                          | 1.97 | 4.19 | 3.08 |
| Rps27l   | RS27L_MOUSE  | 40S ribosomal protein S27-like                                       | 3.6  | 2.57 | 3.08 |
| Dstn     | Q4FK36_MOUSE | Destrin                                                              | 2.26 | 3.9  | 3.08 |
| Vasp     | VASP_MOUSE   | Vasodilator-stimulated phosphoprotein                                | 2.22 | 3.91 | 3.06 |
| Ldlr     | LDLR_MOUSE   | Low-density lipoprotein receptor                                     | 1.12 | 4.97 | 3.04 |
| Acp2     | A2AGR5_MOUSE | Lysosomal acid phosphatase                                           | 2.53 | 3.5  | 3.02 |
| Pls1     | PLSI_MOUSE   | Plastin-1                                                            | 3.07 | 2.97 | 3.02 |
| Txnl1    | TXNL1_MOUSE  | Thioredoxin-like protein 1                                           | 2.78 | 3.23 | 3.01 |
| Gnas     | GNAS2_MOUSE  | Guanine nucleotide-binding protein G(s) subunit alpha isoforms short | 1.67 | 4.32 | 2.99 |
| Psmb7    | A2AQL6_MOUSE | Proteasome subunit beta type-7                                       | 1.4  | 4.59 | 2.99 |
| Brox     | BROX_MOUSE   | BRO1 domain-containing protein BROX                                  | 1.63 | 4.35 | 2.99 |
| Pak2     | PAK2_MOUSE   | Serine/threonine-protein kinase PAK 2                                | 2.71 | 3.23 | 2.97 |
| Rpl27a   | RL27A_MOUSE  | 60S ribosomal protein L27a                                           | 3.88 | 2.03 | 2.95 |
| Rps25    | Q58EA6_MOUSE | MCG10725, isoform CRA_a                                              | 2.79 | 3.1  | 2.94 |
| Tubb1    | TBB1_MOUSE   | Tubulin beta-1 chain                                                 | 4.21 | 1.62 | 2.91 |
| Dbi      | Q548W7_MOUSE | Diazepam binding inhibitor                                           | 2.83 | 2.98 | 2.9  |
| A2m      | A2M_MOUSE    | Alpha-2-macroglobulin                                                | 4.46 | 1.33 | 2.9  |
| Hgsnat   | HGNAT_MOUSE  | Heparan-alpha-glucosaminide N-acetyltransferase                      | 2.52 | 3.25 | 2.89 |
| Hnrnpa1  | ROA1_MOUSE   | Heterogeneous nuclear ribonucleoprotein A1                           | 3.9  | 1.87 | 2.89 |
| Hist1h1d | Q149Z9_MOUSE | Histone cluster 1, H1d                                               | 2.79 | 2.98 | 2.89 |
| Tubb4a   | TBB4A_MOUSE  | Tubulin beta-4A chain                                                | 2.24 | 3.51 | 2.88 |
| Dnaja1   | Q5NTY0_MOUSE | DnaJ (Hsp40) homolog, subfamily A, member 1                          | 3.05 | 2.7  | 2.88 |
| ENV1     | ENV1_MOUSE   | MLV-related proviral Env polyprotein                                 | 2.78 | 2.96 | 2.87 |
| Otub1    | OTUB1_MOUSE  | Ubiquitin thioesterase OTUB1                                         | 1.14 | 4.56 | 2.85 |
| Prkacb   | KAPCB_MOUSE  | cAMP-dependent protein kinase catalytic subunit beta                 | 1.38 | 4.27 | 2.83 |
| Lxn      | Q14BZ3_MOUSE | Latexin                                                              | 2.55 | 3.1  | 2.83 |
| Lasp1    | Q543N3_MOUSE | LIM and SH3 protein 1, isoform                                       | 1.69 | 3.92 | 2.8  |

|          |              | CRA_b                                                                           |      |      |      |
|----------|--------------|---------------------------------------------------------------------------------|------|------|------|
| S100a13  | Q545H7_MOUSE | S100 calcium binding protein A13                                                | 1.69 | 3.91 | 2.8  |
| Hnrnpab  | Q544Z3_MOUSE | Heterogeneous nuclear ribonucleoprotein A/B, isoform CRA_c                      | 3.04 | 2.56 | 2.8  |
| Dnajc5   | A2AUE2_MOUSE | DnaJ homolog subfamily C member 5                                               | 2.51 | 3.09 | 2.8  |
| Psmb6    | A2CFA7_MOUSE | Proteasome subunit beta type-6                                                  | 2.23 | 3.35 | 2.79 |
| Nap111   | NP1L1_MOUSE  | Nucleosome assembly protein 1-like 1                                            | 4.51 | 1.07 | 2.79 |
| Arpc2    | ARPC2_MOUSE  | Actin-related protein 2/3 complex subunit 2                                     | 3.03 | 2.54 | 2.78 |
| Fkbp1a   | A2AT05_MOUSE | Peptidyl-prolyl cis-trans isomerase FKBP1A                                      | 1.92 | 3.64 | 2.78 |
| My16b    | MYL6B_MOUSE  | Myosin light chain 6B                                                           | 4.21 | 1.35 | 2.78 |
| Tollip   | A6PWS1_MOUSE | Toll-interacting protein                                                        | 1.64 | 3.78 | 2.71 |
| Napa     | SNAA_MOUSE   | Alpha-soluble NSF attachment protein                                            | 1.44 | 3.92 | 2.68 |
| Cd81     | CD81_MOUSE   | CD81 antigen                                                                    | 2.52 | 2.84 | 2.68 |
| Cdc37    | CDC37_MOUSE  | Hsp90 co-chaperone Cdc37                                                        | 2.78 | 2.56 | 2.67 |
| Tuba1b   | TBA1B_MOUSE  | Tubulin alpha-1B chain                                                          | 1.31 | 3.94 | 2.63 |
| Rpl11    | A2BH07_MOUSE | 60S ribosomal protein L11                                                       | 3.37 | 1.88 | 2.62 |
| Rpl13    | RL13_MOUSE   | 60S ribosomal protein L13                                                       | 3.61 | 1.61 | 2.61 |
| Gng2     | GBG2_MOUSE   | Guanine nucleotide-binding protein G(I)/G(S)/G(O) subunit gamma-2               | 2.8  | 2.42 | 2.61 |
| Calml3   | CALL3_MOUSE  | Calmodulin-like protein 3                                                       | 1.95 | 3.26 | 2.6  |
| Was      | WASP_MOUSE   | Wiskott-Aldrich syndrome protein homolog                                        | 3.03 | 2.16 | 2.59 |
| Cadm1    | CADM1_MOUSE  | Cell adhesion molecule 1                                                        | 3.68 | 1.48 | 2.58 |
| Mif      | Q545F0_MOUSE | MCG3124, isoform CRA_b                                                          | 3.4  | 1.75 | 2.58 |
| Sypl1    | SYPL_MOUSE   | Synaptophysin-like protein 1                                                    | 2.85 | 2.28 | 2.57 |
| Fcer1a   | FCERA_MOUSE  | High affinity immunoglobulin epsilon receptor subunit alpha                     | 3.35 | 1.75 | 2.55 |
| Cst7     | CYTF_MOUSE   | Cystatin-F                                                                      | 3.37 | 1.74 | 2.55 |
| Eif2s3x  | Q3TML6_MOUSE | Eukaryotic translation initiation factor 2, subunit 3, structural gene X-linked | 3.61 | 1.49 | 2.55 |
| Rpl23a   | Q5M9M5_MOUSE | MCG10806                                                                        | 2.23 | 2.84 | 2.54 |
| Abcb6    | ABCB6_MOUSE  | ATP-binding cassette sub-family B member 6, mitochondrial                       | 2.79 | 2.28 | 2.54 |
| Banf1    | BAF_MOUSE    | Barrier-to-autointegration factor                                               | 3.32 | 1.75 | 2.53 |
| Hist1h1b | Q5T003_MOUSE | Histone H1.5                                                                    | 1.69 | 3.38 | 2.53 |
| Rbbp4    | RBBP4_MOUSE  | Histone-binding protein RBBP4                                                   | 3.11 | 1.88 | 2.49 |
| Eif3b    | EIF3B_MOUSE  | Eukaryotic translation initiation factor 3 subunit B                            | 3.35 | 1.62 | 2.49 |

|         |              |                                                                  |      |      |      |
|---------|--------------|------------------------------------------------------------------|------|------|------|
| Cct6a   | Q3TI05_MOUSE | Chaperonin containing Tcp1, subunit 6a (Zeta)                    | 2.25 | 2.7  | 2.48 |
| Chmp5   | B1AY07_MOUSE | Charged multivesicular body protein 5                            | 3.6  | 1.33 | 2.47 |
| Gpx4    | GPX41_MOUSE  | Phospholipid hydroperoxide glutathione peroxidase, mitochondrial | 1.67 | 3.25 | 2.46 |
| Pdcd6   | PDCD6_MOUSE  | Programmed cell death protein 6                                  | 1.65 | 3.21 | 2.43 |
| Ganab   | GANAB_MOUSE  | Neutral alpha-glucosidase AB                                     | 1.66 | 3.18 | 2.42 |
| LTF     | TRFL_HUMAN   | Lactotransferrin                                                 | 2.79 | 2.03 | 2.41 |
| Hnrnpk  | HNRPK_MOUSE  | Heterogeneous nuclear ribonucleoprotein K                        | 3.08 | 1.74 | 2.41 |
| Ppp3ca  | B2RRX2_MOUSE | Serine/threonine-protein phosphatase                             | 2.81 | 2.01 | 2.41 |
| Gmfg    | A7VJA4_MOUSE | Glia maturation factor gamma                                     | 2.51 | 2.29 | 2.4  |
| Ppp2r4  | Q543N6_MOUSE | Putative uncharacterized protein                                 | 1.69 | 3.1  | 2.39 |
| Rab37   | RAB37_MOUSE  | Ras-related protein Rab-37                                       | 3.37 | 1.35 | 2.36 |
| Rpe     | B2KGE9_MOUSE | Ribulose-phosphate 3-epimerase                                   | 1.97 | 2.7  | 2.34 |
| Klk8    | KLK8_MOUSE   | Kallikrein-8                                                     | 1.67 | 2.99 | 2.33 |
| Rps15a  | Q5M9M4_MOUSE | Ribosomal protein S15A                                           | 2.78 | 1.88 | 2.33 |
| Atrn    | ATRN_MOUSE   | Attractin                                                        | 2.22 | 2.43 | 2.32 |
| Rps6    | Q5BLK1_MOUSE | 40S ribosomal protein S6                                         | 2.2  | 2.44 | 2.32 |
| Psma3   | Q58EV4_MOUSE | Proteasome subunit alpha type                                    | 1.39 | 3.24 | 2.31 |
| Cmtm7   | CKLF7_MOUSE  | CKLF-like MARVEL transmembrane domain-containing protein 7       | 3.38 | 1.21 | 2.3  |
| Cast    | ICAL_MOUSE   | Calpastatin                                                      | 1.08 | 3.5  | 2.29 |
| Rragc   | RRAGC_MOUSE  | Ras-related GTP-binding protein C                                | 3.6  | 0.95 | 2.27 |
| Fh      | FUMH_MOUSE   | Fumarate hydratase, mitochondrial                                | 2.26 | 2.28 | 2.27 |
| Rpl21   | RL21_MOUSE   | 60S ribosomal protein L21                                        | 1.96 | 2.55 | 2.26 |
| Rps20   | Q5BLK2_MOUSE | MCG3574                                                          | 2.16 | 2.31 | 2.24 |
| Rab18   | Q0PD38_MOUSE | RAB18, member RAS oncogene family, isoform CRA_a                 | 1.11 | 3.36 | 2.23 |
| Hnrnpu  | HNRPU_MOUSE  | Heterogeneous nuclear ribonucleoprotein U                        | 1.91 | 2.55 | 2.23 |
| Crmp1   | DPYL1_MOUSE  | Dihydropyrimidinase-related protein 1                            | 3.34 | 1.09 | 2.21 |
| KV3A6   | KV3A6_MOUSE  | Ig kappa chain V-III region MOPC 321                             | 2.23 | 2.17 | 2.2  |
| Dync1i2 | A2BFF7_MOUSE | Dynein cytoplasmic 1 intermediate chain 2                        | 2.78 | 1.62 | 2.2  |
| Hmgb2   | HMGB2_MOUSE  | High mobility group protein B2                                   | 2.51 | 1.89 | 2.2  |
| Sh3kbp1 | A2AG61_MOUSE | SH3 domain-containing kinase-binding protein 1                   | 1.39 | 2.97 | 2.18 |
| Padi2   | PADI2_MOUSE  | Protein-arginine deiminase type-2                                | 1.69 | 2.66 | 2.17 |

|          |              |                                                                             |      |      |      |
|----------|--------------|-----------------------------------------------------------------------------|------|------|------|
| Cln5     | B2RUP8_MOUSE | Ceroid-lipofuscinosis, neuronal 5                                           | 1.11 | 3.2  | 2.15 |
| Lrrfip1  | LRRF1_MOUSE  | Leucine-rich repeat flightless-interacting protein 1                        | 1.35 | 2.94 | 2.15 |
| Eif4a1   | Q5F2A7_MOUSE | Putative uncharacterized protein                                            | 1.14 | 3.09 | 2.11 |
| Tsg101   | Q3UCW0_MOUSE | MCG123182                                                                   | 1.12 | 3.1  | 2.11 |
| Tnf      | Q3U593_MOUSE | Tumor necrosis factor                                                       | 2.74 | 1.47 | 2.11 |
| L1cam    | L1CAM_MOUSE  | Neural cell adhesion molecule L1                                            | 2.52 | 1.64 | 2.08 |
| Nt5c     | A2A9X6_MOUSE | 5'(3')-deoxyribonucleotidase, cytosolic type                                | 2.51 | 1.62 | 2.06 |
| Rps2     | Q58EU3_MOUSE | MCG12811, isoform CRA_b                                                     | 1.08 | 2.96 | 2.02 |
| C4b      | CO4B_MOUSE   | Complement C4-B                                                             | 3.07 | 0.95 | 2.01 |
| Sirpa    | A2ANC1_MOUSE | Tyrosine-protein phosphatase non-receptor type substrate 1                  | 1.73 | 2.29 | 2.01 |
| Ncl      | NUCL_MOUSE   | Nucleolin                                                                   | 2.22 | 1.74 | 1.98 |
| Rnf149   | RN149_MOUSE  | E3 ubiquitin-protein ligase RNF149                                          | 1.4  | 2.55 | 1.97 |
| Eif4h    | Q564E5_MOUSE | Williams-Beuren syndrome chromosome region 1 homolog (Human), isoform CRA_a | 1.14 | 2.8  | 1.97 |
| Slc12a6  | S12A6_MOUSE  | Solute carrier family 12 member 6                                           | 1.36 | 2.58 | 1.97 |
| Slc16a1  | Q544N9_MOUSE | Solute carrier family 16 (Monocarboxylic acid transporters), member 1       | 2.81 | 1.08 | 1.95 |
| Rcn1     | A2A3Z8_MOUSE | Reticulocalbin-1                                                            | 2.26 | 1.62 | 1.94 |
| Pfas     | PUR4_MOUSE   | Phosphoribosylformylglycinamide synthase                                    | 2.81 | 1.07 | 1.94 |
| Slc38a9  | S38A9_MOUSE  | Putative sodium-coupled neutral amino acid transporter 9                    | 2.79 | 1.08 | 1.93 |
| Lypla1   | LYPA1_MOUSE  | Acyl-protein thioesterase 1                                                 | 2.79 | 1.07 | 1.93 |
| Phgdh    | SERA_MOUSE   | D-3-phosphoglycerate dehydrogenase                                          | 2.52 | 1.34 | 1.93 |
| Enpp5    | ENPP5_MOUSE  | Ectonucleotide pyrophosphatase/phosphodiesterase family member 5            | 1.96 | 1.9  | 1.93 |
| Rpl9     | Q5EBQ6_MOUSE | MCG10266, isoform CRA_a                                                     | 1.14 | 2.69 | 1.91 |
| Slc38a2  | S38A2_MOUSE  | Sodium-coupled neutral amino acid transporter 2                             | 1.11 | 2.7  | 1.91 |
| Acp1     | Q4VAI2_MOUSE | Acid phosphatase 1, soluble                                                 | 1.4  | 2.3  | 1.85 |
| Plekho2  | PKHO2_MOUSE  | Pleckstrin homology domain-containing family O member 2                     | 1.4  | 2.29 | 1.84 |
| Spp12a   | SPP2A_MOUSE  | Signal peptide peptidase-like 2A                                            | 1.4  | 2.28 | 1.84 |
| Rps5     | RS5_MOUSE    | 40S ribosomal protein S5                                                    | 1.41 | 2.17 | 1.79 |
| Rps12    | RS12_MOUSE   | 40S ribosomal protein S12                                                   | 1.95 | 1.62 | 1.78 |
| Srgn     | SRGN_MOUSE   | Serglycin                                                                   | 1.95 | 1.61 | 1.78 |
| Hist1h1e | H14_MOUSE    | Histone H1.4                                                                | 1.37 | 2.17 | 1.77 |
| Cd200r4  | MO2R4_MOUSE  | Cell surface glycoprotein CD200                                             | 1.97 | 1.5  | 1.74 |

|               |              |                                                              |      |      |      |
|---------------|--------------|--------------------------------------------------------------|------|------|------|
|               |              | receptor 4                                                   |      |      |      |
| Usp5          | UBP5_MOUSE   | Ubiquitin carboxyl-terminal hydrolase 5                      | 2.25 | 1.2  | 1.72 |
| Cd47          | Q3U967_MOUSE | Putative uncharacterized protein                             | 1.69 | 1.75 | 1.72 |
| 1810009J06Rik | F6R7E8_MOUSE | Protein Gm2663                                               | 2.22 | 1.21 | 1.71 |
| Uap111        | UAP1L_MOUSE  | UDP-N-acetylhexosamine pyrophosphorylase-like protein 1      | 1.4  | 2.01 | 1.7  |
| Rps13         | Q5BLJ7_MOUSE | MCG10205                                                     | 1.69 | 1.63 | 1.66 |
| Dnpep         | DNPEP_MOUSE  | Aspartyl aminopeptidase                                      | 1.67 | 1.62 | 1.65 |
| Rpl30         | Q58DZ3_MOUSE | MCG20799                                                     | 1.65 | 1.62 | 1.64 |
| PrkcsH        | Q3U518_MOUSE | Protein kinase C substrate 80K-H, isoform CRA_b              | 1.4  | 1.87 | 1.64 |
| Gabarap       | GBRAP_MOUSE  | Gamma-aminobutyric acid receptor-associated protein          | 2.19 | 1.07 | 1.63 |
| Plin3         | PLIN3_MOUSE  | Perilipin-3                                                  | 2.23 | 0.93 | 1.58 |
| Il13          | Q5SUZ9_MOUSE | Interleukin-13                                               | 2.23 | 0.93 | 1.58 |
| Hgs           | HGS_MOUSE    | Hepatocyte growth factor-regulated tyrosine kinase substrate | 1.96 | 1.2  | 1.58 |
| Pgp           | PGP_MOUSE    | Phosphoglycolate phosphatase                                 | 1.95 | 1.21 | 1.58 |
| Tspan31       | TSN31_MOUSE  | Tetraspanin-31                                               | 1.4  | 1.76 | 1.58 |
| Nans          | Q3TFB5_MOUSE | Putative uncharacterized protein                             | 1.95 | 1.21 | 1.58 |
| Rpl28         | Q5M9J8_MOUSE | MCG13936                                                     | 1.4  | 1.75 | 1.58 |
| Plekhb2       | PKHB2_MOUSE  | Pleckstrin homology domain-containing family B member 2      | 1.67 | 1.48 | 1.57 |
| Rps11         | Q3UC02_MOUSE | MCG23457                                                     | 1.11 | 2.04 | 1.57 |
| Rps23         | RS23_MOUSE   | 40S ribosomal protein S23                                    | 1.66 | 1.49 | 1.57 |
| Stx3          | Q3TBP0_MOUSE | Putative uncharacterized protein                             | 1.14 | 2    | 1.57 |
| Bin2          | BIN2_MOUSE   | Bridging integrator 2                                        | 1.66 | 1.47 | 1.56 |
| Hnrnpl        | HNRPL_MOUSE  | Heterogeneous nuclear ribonucleoprotein L                    | 1.66 | 1.46 | 1.56 |
| Rab32         | Q0PD23_MOUSE | RAB32, member RAS oncogene family                            | 1.42 | 1.64 | 1.53 |
| Tmed7         | D3YZZ5_MOUSE | Protein Tmed7                                                | 1.69 | 1.36 | 1.52 |
| Igkc          | IGKC_MOUSE   | Ig kappa chain C region                                      | 1.69 | 1.35 | 1.52 |
| Spns1         | SPNS1_MOUSE  | Protein spinster homolog 1                                   | 1.4  | 1.62 | 1.51 |
| Actn2         | ACTN2_MOUSE  | Alpha-actinin-2                                              | 1.11 | 1.87 | 1.49 |
| Ck054         | CK054_MOUSE  | Ester hydrolase C11orf54 homolog                             | 1.4  | 1.49 | 1.44 |
| Lamtor2       | LTOR2_MOUSE  | Ragulator complex protein LAMTOR2                            | 1.4  | 1.47 | 1.43 |
| Btd           | BTD_MOUSE    | Biotinidase                                                  | 1.09 | 1.76 | 1.43 |
| Fucl          | FUCO_MOUSE   | Tissue alpha-L-fucosidase                                    | 1.7  | 1.06 | 1.38 |
| Asph          | A2AL84_MOUSE | Aspartyl/asparaginyl beta-hydroxylase                        | 1.4  | 1.35 | 1.37 |
| Kv5aa         | KV5AA_MOUSE  | Ig kappa chain V-V region MOPC 173                           | 1.1  | 1.62 | 1.36 |



|        |              |                                                     |      |      |      |
|--------|--------------|-----------------------------------------------------|------|------|------|
| Blvrb  | Q3U6G1_MOUSE | Biliverdin reductase B (Flavin reductase (NADPH))   | 1.69 | 0.94 | 1.31 |
| Vps37c | VP37C_MOUSE  | Vacuolar protein sorting-associated protein 37C     | 1.4  | 1.22 | 1.31 |
| Pcna   | Q542J9_MOUSE | Proliferating cell nuclear antigen                  | 1.4  | 1.2  | 1.3  |
| Mat2a  | Q99J57_MOUSE | S-adenosylmethionine synthase                       | 1.4  | 1.19 | 1.3  |
| Wasf2  | B1AUN1_MOUSE | Wiskott-Aldrich syndrome protein family member 2    | 1.15 | 1.35 | 1.25 |
| Snd1   | SND1_MOUSE   | Staphylococcal nuclease domain-containing protein 1 | 1.41 | 1.06 | 1.24 |
| Akap9  | AKAP9_MOUSE  | A-kinase anchor protein 9                           | 1.12 | 1.35 | 1.23 |
| S100a6 | Q545I9_MOUSE | MC3T3-E1 calyculin                                  | 1.11 | 1.08 | 1.1  |

Table S4

| <b>Term</b>                                      | <b>Count</b> | <b>%</b> | <b>P-Value</b> | <b>Benjamini</b> |
|--------------------------------------------------|--------------|----------|----------------|------------------|
| BP00001:Carbohydrate metabolism                  | 59           | 9.5      | 6.30E-13       | 1.00E-10         |
| BP00060:Protein metabolism and modification      | 175          | 28.2     | 1.00E-11       | 8.30E-10         |
| BP00061:Protein biosynthesis                     | 52           | 8.4      | 1.50E-10       | 8.40E-09         |
| BP00125:Intracellular protein traffic            | 66           | 10.6     | 1.70E-07       | 7.10E-06         |
| BP00062:Protein folding                          | 20           | 3.2      | 2.40E-06       | 8.10E-05         |
| BP00005:Glycolysis                               | 11           | 1.8      | 6.90E-06       | 1.90E-04         |
| BP00129:Endocytosis                              | 26           | 4.2      | 9.90E-06       | 2.40E-04         |
| BP00268:Antioxidation and free radical removal   | 10           | 1.6      | 1.20E-05       | 2.60E-04         |
| BP00140:Other protein targeting and localization | 7            | 1.1      | 3.20E-05       | 6.00E-04         |
| BP00285:Cell structure and motility              | 63           | 10.1     | 6.90E-05       | 1.20E-03         |
| BP00126:Exocytosis                               | 17           | 2.7      | 1.30E-04       | 2.00E-03         |
| BP00286:Cell structure                           | 42           | 6.8      | 1.40E-04       | 1.90E-03         |
| BP00071:Proteolysis                              | 60           | 9.7      | 2.40E-04       | 3.10E-03         |
| BP00276:General vesicle transport                | 22           | 3.5      | 2.70E-04       | 3.20E-03         |
| BP00287:Cell motility                            | 25           | 4        | 7.60E-04       | 8.40E-03         |
| BP00009:Other polysaccharide metabolism          | 14           | 2.3      | 1.40E-03       | 1.40E-02         |
| BP00132:Receptor mediated endocytosis            | 12           | 1.9      | 1.90E-03       | 1.90E-02         |
| BP00007:Penrose-phosphate shunt                  | 4            | 0.6      | 2.50E-03       | 2.30E-02         |
| BP00178:Stress response                          | 17           | 2.7      | 2.80E-03       | 2.50E-02         |
| BP00148:Immunity and defense                     | 80           | 12.9     | 4.50E-03       | 3.70E-02         |
| BP00072:Protein complex assembly                 | 8            | 1.3      | 6.60E-03       | 5.10E-02         |
| BP00011:Monosaccharide metabolism                | 6            | 1        | 1.40E-02       | 1.00E-01         |
| BP00069:Protein disulfide-isomerase              | 4            | 0.6      | 2.40E-02       | 1.60E-01         |

|                                            |    |     |          |          |
|--------------------------------------------|----|-----|----------|----------|
| reaction                                   |    |     |          |          |
| BP00032:Purine metabolism                  | 7  | 1.1 | 2.90E-02 | 1.90E-01 |
| BP00298:Glycogen metabolism                | 6  | 1   | 3.00E-02 | 1.80E-01 |
| BP00073:Translational regulation           | 8  | 1.3 | 3.50E-02 | 2.00E-01 |
| BP00137:Protein targeting and localization | 13 | 2.1 | 5.10E-02 | 2.80E-01 |
| BP00012:Other carbohydrate metabolism      | 6  | 1   | 5.30E-02 | 2.80E-01 |
| BP00280:Lysosome transport                 | 3  | 0.5 | 7.10E-02 | 3.50E-01 |
| BP00008:Tricarboxylic acid pathway         | 4  | 0.6 | 9.10E-02 | 4.10E-01 |
| BP00189:Hearing                            | 4  | 0.6 | 9.90E-02 | 4.30E-01 |

Table S5

| <b>Term</b>                                 | <b>Count</b> | <b>%</b> | <b>P-Value</b> | <b>Benjamini</b> |
|---------------------------------------------|--------------|----------|----------------|------------------|
| BP00074:Amino acid activation               | 4            | 5        | 7.60E-04       | 6.00E-02         |
| BP00013:Amino acid metabolism               | 6            | 7.5      | 3.30E-03       | 1.30E-01         |
| BP00060:Protein metabolism and modification | 24           | 30       | 4.40E-03       | 1.10E-01         |
| BP00071:Proteolysis                         | 10           | 12.5     | 3.80E-02       | 5.50E-01         |
| BP00288:Granulocyte-mediated immunity       | 3            | 3.8      | 4.10E-02       | 5.00E-01         |

Table S6

| <b>Term</b>                                               | <b>Count</b> | <b>%</b> | <b>P-Value</b> | <b>Benjamini</b> |
|-----------------------------------------------------------|--------------|----------|----------------|------------------|
| BP00276:General vesicle transport                         | 15           | 4.2      | 5.70E-04       | 8.60E-02         |
| BP00176:Blood clotting                                    | 8            | 2.2      | 2.10E-03       | 1.60E-01         |
| BP00125:Intracellular protein traffic                     | 32           | 8.9      | 4.30E-03       | 2.00E-01         |
| BP00107:Cytokine and chemokine mediated signaling pathway | 13           | 3.6      | 4.70E-03       | 1.70E-01         |
| BP00291:Calcium ion homeostasis                           | 5            | 1.4      | 5.30E-03       | 1.50E-01         |
| BP00060:Protein metabolism and modification               | 80           | 22.3     | 7.40E-03       | 1.80E-01         |
| BP00129:Endocytosis                                       | 13           | 3.6      | 7.50E-03       | 1.60E-01         |
| BP00148:Immunity and defense                              | 48           | 13.4     | 9.50E-03       | 1.70E-01         |
| BP00141:Transport                                         | 40           | 11.2     | 1.20E-02       | 1.90E-01         |
| BP00287:Cell motility                                     | 14           | 3.9      | 1.60E-02       | 2.20E-01         |
| BP00124:Cell adhesion                                     | 21           | 5.9      | 1.80E-02       | 2.30E-01         |
| BP00071:Proteolysis                                       | 31           | 8.7      | 2.80E-02       | 3.10E-01         |
| BP00072:Protein complex assembly                          | 5            | 1.4      | 3.70E-02       | 3.60E-01         |
| BP00123:Other signal transduction                         | 5            | 1.4      | 4.30E-02       | 3.90E-01         |
| BP00075:Other protein metabolism                          | 4            | 1.1      | 5.40E-02       | 4.40E-01         |
| BP00288:Granulocyte-mediated immunity                     | 5            | 1.4      | 5.90E-02       | 4.50E-01         |
| BP00274:Cell communication                                | 32           | 8.9      | 6.30E-02       | 4.50E-01         |
| BP00267:Homeostasis                                       | 9            | 2.5      | 6.40E-02       | 4.40E-01         |
| BP00273:Chromatin packaging and remodeling                | 8            | 2.2      | 6.80E-02       | 4.40E-01         |
| BP00132:Receptor mediated endocytosis                     | 6            | 1.7      | 7.20E-02       | 4.40E-01         |
| BP00122:Ligand-mediated signaling                         | 13           | 3.6      | 7.50E-02       | 4.40E-01         |

|                                            |    |     |          |          |
|--------------------------------------------|----|-----|----------|----------|
| BP00286:Cell structure                     | 19 | 5.3 | 8.30E-02 | 4.60E-01 |
| BP00120:Cell adhesion-mediated signaling   | 13 | 3.6 | 8.70E-02 | 4.70E-01 |
| BP00117:JAK-STAT cascade                   | 5  | 1.4 | 9.00E-02 | 4.60E-01 |
| BP00062:Protein folding                    | 7  | 2   | 9.10E-02 | 4.50E-01 |
| BP00209:Blood circulation and gas exchange | 5  | 1.4 | 9.60E-02 | 4.60E-01 |

Suppl. Figure 1

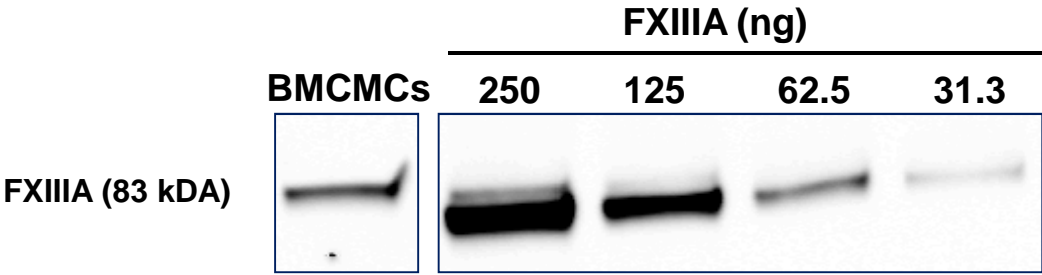

Suppl. Figure 2

A

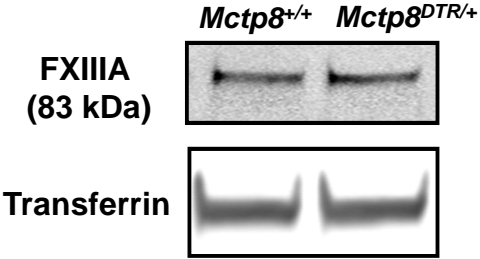

B

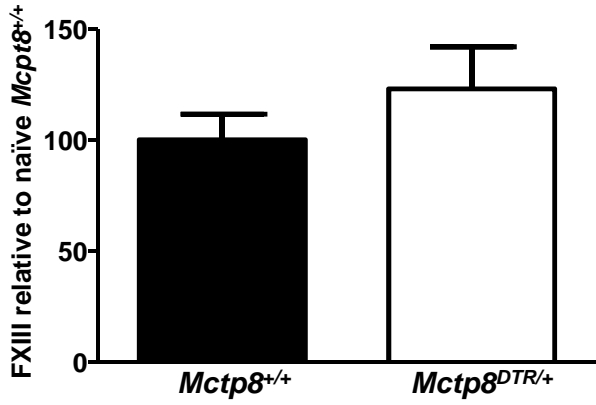



Suppl. Figure 3

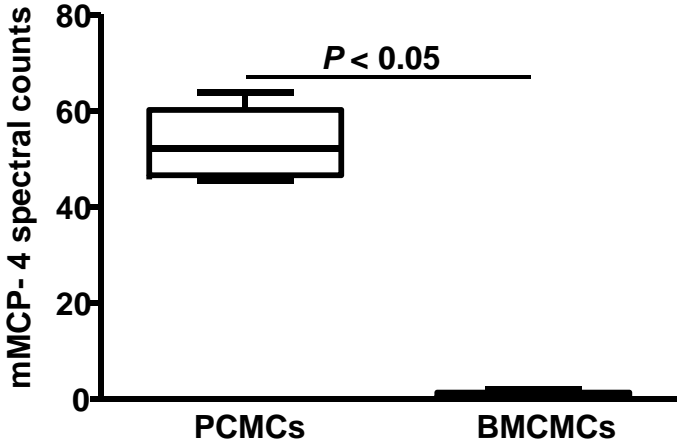

Suppl. Figure 4

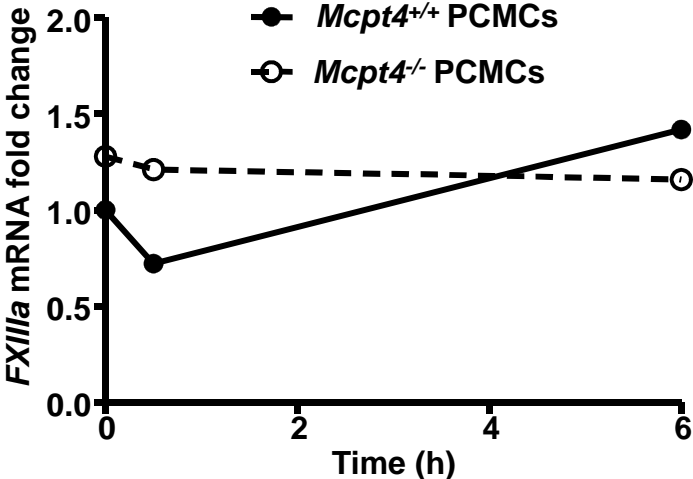

Suppl. Figure 5

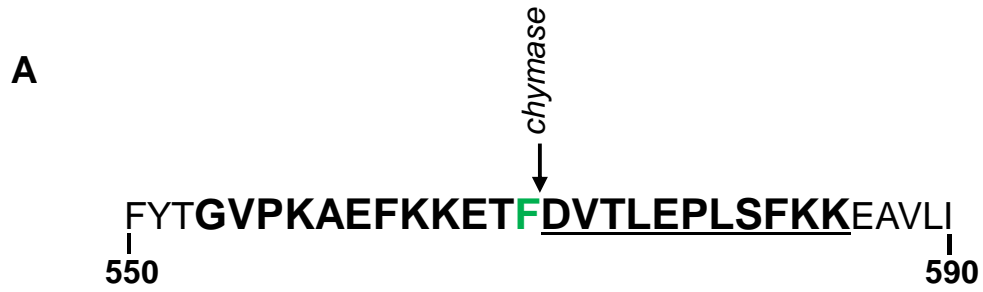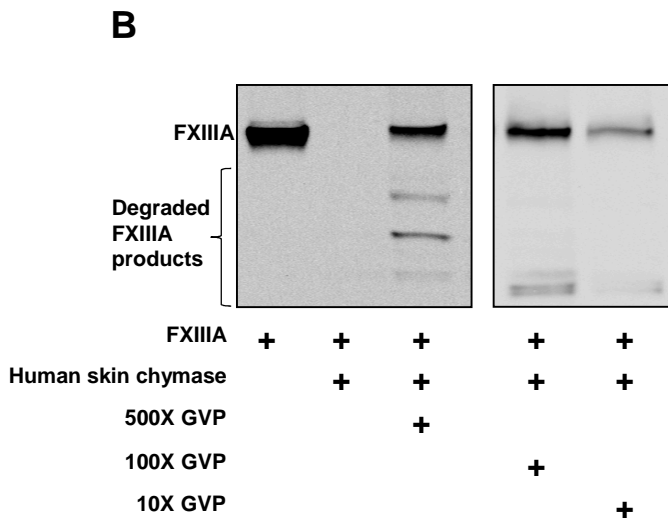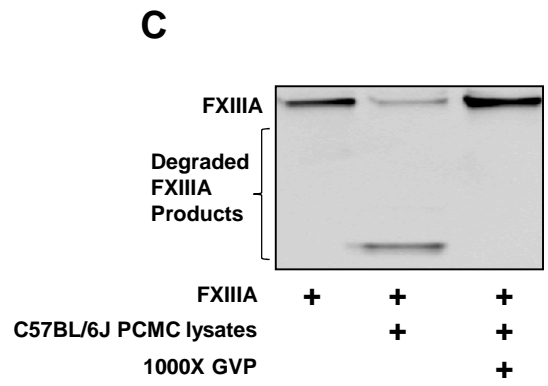

Suppl. Figure 6

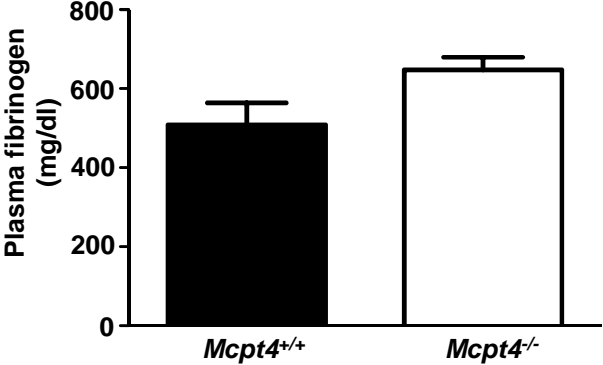

Suppl. Figure 7

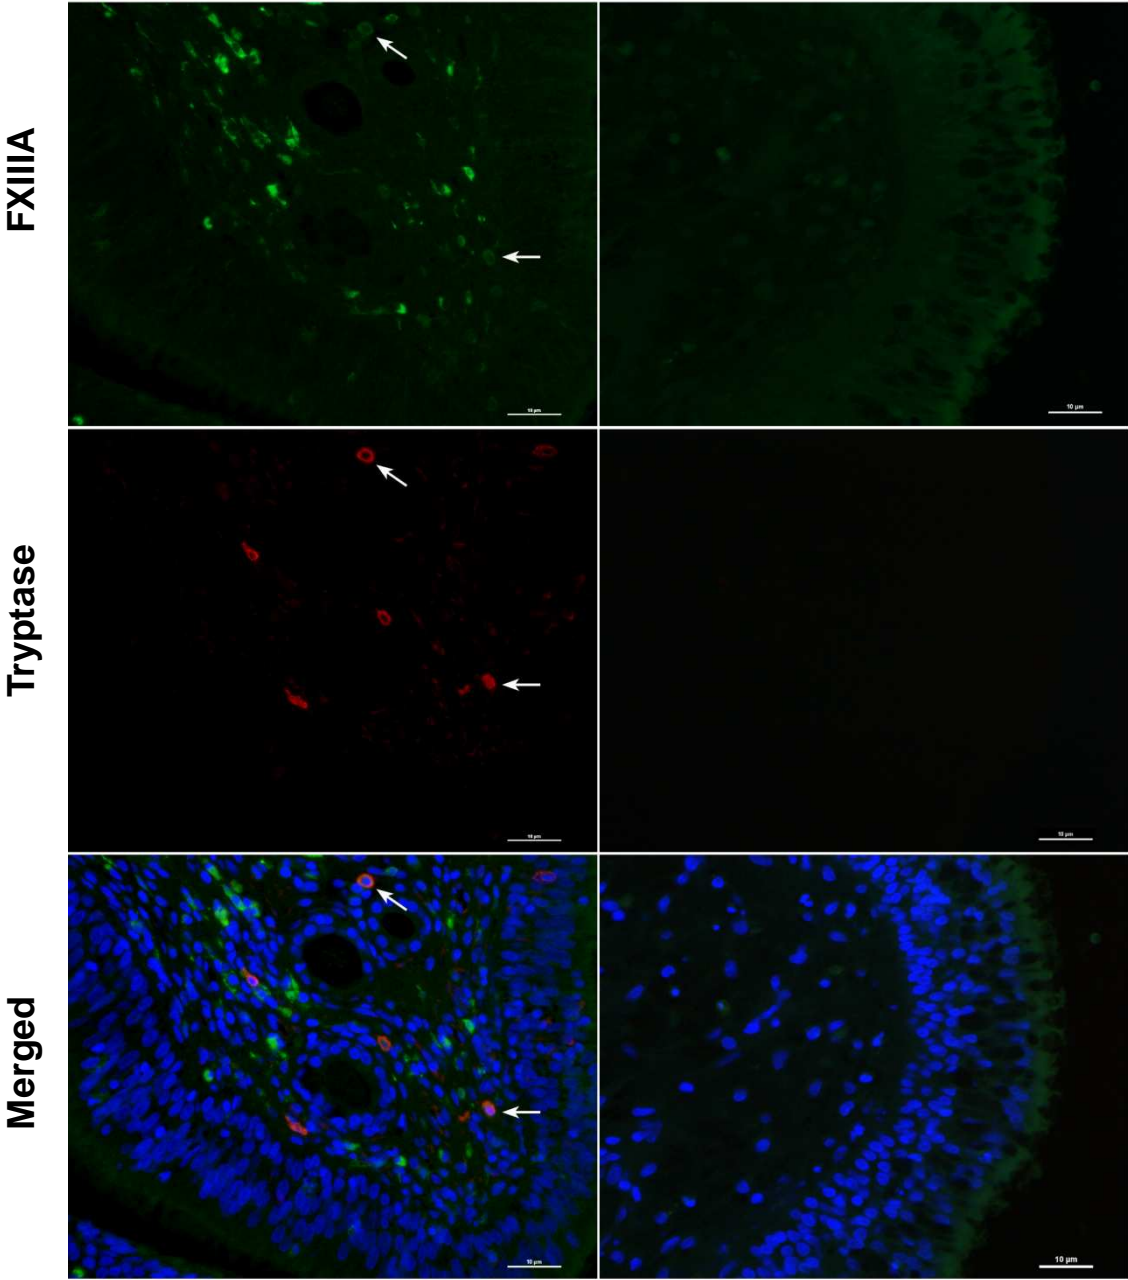

## METHODS

### Mice

*Cpa3*-Cre expressing mice<sup>1</sup> on the C57BL/6 background were crossed with *ROSA*<sup>DTA/DTA</sup> mice that were purchased from Jackson Laboratories to generate mast cell- and basophil-deficient mice (*Cpa3*-Cre; *ROSA*<sup>DTA/DTA</sup>) as well as the corresponding control mice (*Cpa3*-Cre; *ROSA*<sup>+/+</sup>).<sup>2</sup> *Mcpt8*<sup>DTR</sup> mice<sup>3</sup> (kindly provided by Dr. Hajime Karasuyama, Tokyo and Medical and Dental University, Tokyo, Japan) and mMCP-4-deficient mice (*Mcpt4*<sup>-/-</sup>)<sup>4</sup> on the C57BL/6 background, like all of the other mice used in this study, were bred and maintained at the Seattle Children's Research Institute. The C57BL/6J mice were purchased from Jackson Laboratories. Unless specified otherwise, all of the experiments were performed using male mice that were 12 weeks old at the beginning of the experiment. All of the animal care and experimentation was conducted in accordance with the current National Institutes of Health guidelines and with the approval from the Seattle Children's Research Institute Institutional Animal Care and Use Committee.

### Cecal ligation and puncture

Cecal ligation and puncture (CLP) was performed as described.<sup>5</sup> Briefly, mice were deeply anaesthetized by an intraperitoneal (i.p.) injection of 100 mg/kg ketamine and 20 mg/kg xylazine, and the cecum was exposed following a 1-2 cm midline incision on the anterior abdomen. The distal half of the cecum was then subjected to ligation and the ligated segment was then punctured once with a 22G needle (to induce a moderately severe model of CLP in which 20-50% of the wild type mice died within 4 days after CLP). The cecum was then

replaced into the abdomen, 1 ml of sterile saline (pyrogen-free 0.9% NaCl) was administered into the peritoneal cavity, and the incision was closed using 9-mm steel wound clips.

The mice were observed for mortality at least four times daily. Mice that were clearly moribund were euthanized by CO<sub>2</sub> inhalation.

### **Bleeding time test**

Tail tip bleeding was performed as previously described.<sup>6</sup> Briefly, we resected 3-4 mm of mouse tail from the tip. Time until bleeding cessation was monitored by blood aspiration onto a piece of filter paper.

### **Generation of peritoneal cell-derived mast cells (PCMCs)**

Peritoneal cells from wild type (*Mcpt4*<sup>+/+</sup> mice) and *Mcpt4*<sup>-/-</sup> mice were maintained *in vitro* for two weeks in medium containing 10ng/ml IL-3 (Peprotech, Rocky Hill, NJ) and 50 ng/ml SCF (Peprotech) until the mast cells represented >95% of the total non-adherent cells according to May-Grünwald-Giemsa staining.<sup>7</sup>

### **Generation of bone marrow derived-cultured mast cells (BMCMCs)**

Femoral bone marrow cells from *Mcpt4*<sup>+/+</sup> and *Mcpt4*<sup>-/-</sup> mice were maintained *in vitro* for ~4 weeks in medium containing 10 ng/ml IL-3 (Peprotech) until the mast cells represented >95% of the total cells according to May-Grünwald-Giemsa staining.

### **IgE/antigen mast cell activation**

BMCMCs or PCMCs were sensitized with 2  $\mu\text{g/ml}$  of anti-DNP IgE mAb (H1- $\epsilon$ -26) <sup>8</sup> by overnight incubation at 37°C. The cells were then washed with Tyrode's buffer (10 mM Hepes, pH 7.4, 130 mM NaCl, 5 mM KCl, 1.4 mM CaCl<sub>2</sub>, 1 mM MgCl<sub>2</sub>, and 0.1% glucose) and re-suspended at  $2 \times 10^6$  cells/ml in 2.5 mL of the cell suspension. DNP-HSA (Sigma-Aldrich) was then added to the wells to achieve a final concentration of 100 ng/ml and incubated at 37°C for 6 h and supernatants collected by centrifugation. In the conditions used, mast cells released 50-60% of the pre-formed mediator beta-hexosaminidase.

### **Mass spectrometry analysis of the mast cell releasates**

*Mass spectrometry (MS) sample preparation.* Supernatants from IgE-activated PCMCs and BMCMCs were collected and concentrated 10-fold using Amicon Ultra-4 centrifugal filter devices with a 30K cut off. The protein concentration was determined using a BCA protein assay kit (Pierce, Rockford, IL), with albumin utilized as the standard. The proteins were suspended at the same concentration in 200 mM ammonium bicarbonate containing 0.1% RapiGest (Waters Corp., Milford, MA). Proteins were reduced with 10 mM dithiothreitol (DTT) at 37 °C, alkylated with 40 mM iodoacetamide (IAA) at room temperature in the dark for 45 min, and then digested at 37 °C for 3 h with trypsin (1:50, w/w; Promega) and then overnight after addition of another aliquot of trypsin (1:50, w/w). The samples were desalted by solid phase extraction on an Oasis HLB column (Waters Corp., Milford, MA), eluted with 80% acetonitrile in 0.1% formic acid, dried down and stored at -80 °C until analysis. Before the analysis, the samples were reconstituted in 5% acetonitrile, 0.1% formic acid.

*Data acquisition via LC-MS/MS.* Digested proteins (0.75  $\mu\text{g}$ ) were injected onto a C18 trap column (XBridge C18 BEH, 5  $\mu\text{m}$ , 0.1 x 30 mm, Waters Corp., Milford, MA), desalted for 10



min with 1% acetonitrile in water, 0.1% formic acid (4  $\mu\text{L}/\text{min}$ ), and eluted onto a C18 analytical column (0.075 x 300 mm) packed with XBridge C18 BEH (3.5  $\mu\text{m}$ , Waters Corp., Milford, MA). Then, the samples were eluted and separated using a gradient between two solvents, 0.1% formic acid in water (A) and 0.1% formic acid in Acetonitrile (B), at a flow rate of 0.4  $\mu\text{L}/\text{min}$  using a multi-segment linear gradient of 2-7%B in 5 min, 7-25%B in 70 min, 25-35%B in 15 min followed by ramp to 80%B and a 5 min wash on a NanoAquity HPLC (Waters Corp., Milford, MA). Positive ion mass spectra were acquired with electrospray ionization in a hybrid quadrupole-orbitrap mass spectrometer (Q Exactive, Thermo Fisher, San Jose, CA) with data-dependent acquisition of MS/MS scans on the 20 most abundant ions in the survey scan (normalized collision energy 27, resolution FWHM at 400 m/z 30,000 for MS and 15,000 for MSMS scans) excluding MSMS on isotopic peaks and 1+, and >4+ charge states. An exclusion window of 45 s was used after single MS/MS scan of a given precursor ion.

*Protein identification and quantification.* MS/MS spectra were matched against the mouse Uniprot database combining SwissProt and TrEMBL databases (Uniprot 2012\_11, 16573 SwissProt, 58303 TrEMBL entries),<sup>9</sup> using the SEQUEST (v2.7) search engine with semi-tryptic enzyme specificity, 20 ppm precision for precursor and unit precision for fragment ions, fixed Cys carbamidomethylation and variable Met oxidation modifications. SEQUEST results were further validated with Trans-Proteomic Pipeline tools, using an adjusted probability of  $\geq 0.90$  for peptides and  $\geq 0.95$  for proteins. Proteins considered for subsequent analysis had to be detected in  $\geq 2$  analyses with  $\geq 2$  unique peptide-spectrum matches (PSM). Relative protein quantification was performed using spectral counting.<sup>10</sup> Significant differences in spectral counts were identified using the PepC algorithm with FDR < 4%, the combination of *G*-test and *t*-test together with permutation analysis to estimate the FDR.<sup>11</sup>

*Bioinformatics analysis.* The DAVID software (Database for Annotation, Visualization, and Integrated Discovery, version 6.7, <https://david.ncifcrf.gov/summary.jsp>) was utilized to determine the general functional annotations of the proteins contained in mast cell releasates. The Uniprot IDs from the tables describing the significantly released PCMC only, BMCMC only, and shared PCMC and BMCMC proteins were uploaded into the 'Functional Annotation' section of DAVID. Then, the 'Gene\_Ontology' tab was selected and the 'PANTHER\_BP\_ALL' category was charted. The DAVID software determines a modified Fisher's exact P-value to determine gene ontology or molecular pathway enrichment. P-values < 0.05 are considered to be strongly enriched in an annotation category.

### **qPCR**

RNA (1 µg) was isolated from cells with an RNeasy mini kit (Qiagen) and converted to first-strand cDNA with the iScript™ cDNA Synthesis Kit (BioRad). The cDNA was analyzed for quantitative expression levels of *Fxiii*, *Fxiib* and *GAPDH* with the Maxima™ SYBR Green/ROX qPCR Master Mix (Fermentas Life Sciences) on a 7500-Fast-Real-Time PCR System or a Step One Plus Real-Time PCR System Thermal Cycling Block (Applied Biosystems). The primers used were as follows: *Fxiii* forward, 5'-AGCACAAGCAGGATCCAGTA-3'; *Fxiii* reverse, 5'-CCCTCTGCGGACAATCAACT-3'; *Fxiib* forward, 5'-GCTGGCTATGCAACCGAAAG-3'; *Fxiib* reverse, 5'-GGGGCCAAACATGTCTCTTG-3'; *GAPDH* forward, 5'-TCACCACCATGGAGAAGGC-3'; *GAPDH* reverse, 5'-GCTAAGCAGTTGGTGGTGCA-3';

Results were analyzed using the dCt method normalized to *gapdh*.

## **Immunofluorescence**

BMCMCs were induced to adhere to 10 µg/ml fibronectin (Sigma)-coated glass coverslips for 1 h by the addition of 1 mM MnCl<sub>2</sub> (Sigma), which induces high affinity conformational changes of integrins on the cell surface. The cells were then washed with PBS, fixed with 4% paraformaldehyde, and washed again with PBS. The samples were then blocked with 3% FBS/0.05% saponin in PBS (antibody/blocking solution) for 30 minutes and then incubated with an anti-FXIII A antibody (clone AC-101, Abcam) that was diluted 1:100 in antibody/blocking solution for 60 minutes at room temperature. The cells were washed with PBS and then incubated with an Alexa Fluor® 594-conjugated anti-mouse donkey polyclonal antibody (A21203, Life Technologies) that was diluted 1:1,000 in antibody/blocking solution for 45 minutes at room temperature, then washed with PBS, and mounted with ProLong® Gold antifade reagent with DAPI (Life Technologies). Images were acquired with an automated Leica DM6000B fluorescent microscope (Leica Microsystems) at 400x total magnification. Separate fluorescent channels were acquired sequentially and overlaid using the accompanying LASAF v2.6 software package.

## **Degradation of FXIII A by PCMC lysates**

Human FXIII A was utilized throughout the *in-vitro* studies with the mouse PCMC lysates, given its high degree of homology with mouse FXIII A. BLAST results indicated that both human and mouse FXIII A have protein sequences that contain 732 amino acids (blast.ncbi.nlm.nih.gov) with 87% identical homology (635/732 identical amino acids) and 95% positive homology (696/732 positive amino acids), which compares similar classes of amino acids (AAs). FXIII A contains four conserved domains, which were determined from the NCBI Conserved Doman

Database ([www.ncbi.nlm.nih.gov/cdd](http://www.ncbi.nlm.nih.gov/cdd)), and includes N-terminal (AAs, 46-167), core (AAs, 309-400), and two C-terminal transglutaminase domain regions (AAs, 519-623 and 631-728) (depicted by different colors in **Fig 5B**). The homology between human and mouse FXIII A with regard to the conserved domains is also very similar, with 88%/98%, 97%/100%, 74%/85%, and 84%/93% identical/positive homology for the N-terminal, core, and two C-terminal transglutaminase regions, respectively. 0.5-1µg of human FXIII A (Haematologic Technologies Inc) was incubated with 100ng- 3µg mouse PCMC lysates ( $2 \times 10^5$  cells/100 µl of lysis buffer [2 M NaCl, 0.5% Triton X-100 in PBS]) that were obtained from *Mcpt4*<sup>+/+</sup> or *Mcpt4*<sup>-/-</sup> mice for the indicated times at 37 °C. FXIII A cleaved fragments were visualized by SDS-PAGE.

Of note, the utilized FXIII A preparation contained FXIII B as well; however, we found that FXIII B was not cleaved by mast cell proteases [data not shown]).

### **Degradation of FXIII A by human chymase**

One microgram FXIII A was incubated with 0.001-0.1U human skin chymase (ENZO Life Sciences) for 6h at 37 °C. The FXIII A cleaved fragments were visualized following silver staining and analyzed with mass spectrometry.

### **Western blot analysis**

BMCMCs and PCMCs were lysed with M-PER (Thermo Scientific) plus 1X halt protease inhibitor and EDTA (Thermo Scientific). Then, the samples were spun at 15,000xg for 15 minutes at 4°C to remove cellular debris. BMCMC lysates, PCMC lysates, FXIII A digests, and plasma sample dilutions (diluted 1:120 in water) were denatured by boiling for 10 min at 70 °C with 1X sample buffer (NuPage 4X LDS sample buffer, Life Technologies) and 1X reducing agent (NuPage 10X sample reducing agent, Life Technologies) and separated with SDS/PAGE

(4-20% Bis-Tris-gels with MOPS running buffer, Genscript), electroblotted onto Invitrolon poly (vinylidene difluoride) membranes (Invitrogen), and then probed with antibodies against FXIIIa (clone 1834, Abcam) along with GAPDH (clone GA1R, Cell Sciences, Canton, MA) as a loading control for cellular samples or transferrin (clone PA3-913, Thermo Scientific) as a loading control for plasma samples.

### **Mass spectrometry analysis of FXIIIa degradation by human chymase**

*MS Sample preparation.* One microgram FXIIIa aliquots were diluted to 200  $\mu$ l final volume in ammonium acetate buffer (100 mM, pH 8.9). The samples were reduced with 50 mM DTT at 56 °C for 60 min and alkylated with 150 mM IAA at room temperature in the dark for 30 min. The alkylation was quenched by addition of 50 mM DTT. The resulting protein samples were adjusted to pH 8.9 by addition of ammonium acetate to 1ml final volume, and were digested into peptides by the addition of trypsin (0.05  $\mu$ g/sample; Promega) and incubated at 37 °C for 2 h with agitation. The trypsin digestion was stopped by the addition of 83  $\mu$ l glacial acetic acid, and the samples were cleared of insoluble debris by centrifugation. Next, the sample was desalted using Sep-Pak columns (Waters Corporation) according to the manufacturer's instructions. The resulting samples were concentrated and resuspended in 0.1% formic acid in water and stored at -80°C until analysis.

*Data Acquisition via LC-MS/MS.* Fused silica capillary tubing (50  $\mu$ m i.d., Polymicro Technologies) was pulled to a tip of 5  $\mu$ m, with a Lithsil frit placed ~2cm upstream of the tip. The column was packed with 25 cm of 3  $\mu$ m Reliasil reversed-phase chromatography material (Orochem Technologies). To load and elute the samples from the column, we used nanoflow liquid chromatography using a Nano Aquity UPLC system (Waters Corporation). The samples

were eluted using a gradient between two solvents: 0.1% formic acid (A) and 0.1% formic acid in 100% Acetonitrile (B). Following loading in 0% A, solvent B was raised to 10% for 5 min, then it was increased using a linear gradient to 40% over the subsequent 110 min prior to a step at 75% for 5 min before re-equilibration. The total gradient time was 150 min at a flow rate of 0.25  $\mu$ l/min. The eluting peptides were ionized via electrospray with the emitter held at 2.4 kV using a custom build ESI source, and directed into a Thermo Scientific Q Exactive mass spectrometer. Each precursor scan covered 400-1600  $m/z$  range and was followed by 20 DDA scans. The dynamic exclusion duration was set to 30 s. A normalized collision energy (CE) of 28 was used. A digest of yeast Enolase protein was run every 2 injections and was used to evaluate chromatographic peak shape, retention time reproducibility, and peak intensity.

*Protein Identification.* Following the LC-MS/MS analysis, .RAW data files were converted into the mzXML format, and the MS/MS spectra were searched with Comet<sup>12</sup> against a human IPI with no enzyme specificity, a static modification of 57.021 on Cysteine residues, and a variable modification of 15.995 on Methionine residues. The peptide spectrum match false discovery rates were determined using the PeptideProphet algorithm with TPP v4.6<sup>13</sup> with an error threshold of 0.025. The chymase cleavage sites were determined using a database search, and they were confirmed by viewing the ion chromatograms in Skyline across the entire sample.<sup>14</sup> Peak areas were extracted from Skyline for exact determinations of the relative peak intensity across the treatments.

### **Clot Formation**

Clot formation was measured using rotational thromboelastometry (ROTEM, Tem Int. Research Triangle Park, NC, USA). FXIIIa (10ug/ml) and chymase (1.4U/ml) were co-incubated in

HEPES pH 7.4. Fibrinogen was added to a final concentration of 4 mg/ml and clotting was activated in the ROTEM at 37°C using 0.5IU/ml thrombin and 10mmol CaCl<sub>2</sub> in addition to 2ug/ml plasmin to induce clot lysis. FXIIIa (10ug/ml) or FXIIIa and chymase (1.4U/ml) were incubated in HEPES pH 7.4.

### **FXIIIa activity levels**

FXIIIa activity levels were determined by using a chromogenic method that measures the ammonia released during the transglutaminase reaction (TECHNOCHROM FXIII kit, Diapharma). Samples were run with and without an FXIIIa inhibitor to correct for reactions leading to FXIIIa independent transglutaminase activity. The results were calculated as:  $\Delta$  Absorbance sample/min -  $\Delta$  Absorbance blank/min.

### **Fibrinogen levels**

Functional fibrinogen concentrations were measured using the STArt-4™ steel ball coagulometer (Diagnostica Stago, Asnières sur Seine Cedex, France) by the modified method of Clauss<sup>15</sup> according to the manufacturer's directions.

### **Histology for nasal polyps**

Five patients with chronic rhinosinusitis-related nasal polyps that were resected between 2010 and 2014 were identified from a pathology database under a protocol approved by Seattle Children's Hospital Institutional Review Board; patients with cystic fibrosis, immunodeficiencies, coagulation disorders, and allergic fungal sinusitis were excluded. Dual immunofluorescence for mast cell tryptase (1:100; clone M7052, Dako) and FXIIIa (1:250;

clone EP3372, Roche) was carried out on formalin-fixed, paraffin-embedded 5- $\mu$ m sections following citrate pH 6.0 antigen retrieval. The antibodies were incubated with the samples overnight at room temperature. FXIII A was developed with goat anti-rabbit IgG, fluorescein conjugate, and mast cell tryptase was developed with goat anti-mouse cyanine (Cy5) (both 1:500, Jackson ImmunoResearch). Coverslips were mounted using Vectashield fluorescent mounting medium with DAPI (Vector Laboratories). Images were visualized and captured with a digital camera mounted on a Nikon Eclipse 80i microscope using NIS-Elements Advanced Research Software v4.13 (Nikon Instruments Inc., Melville, NY).

### **Statistical analysis**

To determine significant differences in the spectral counts (the sum of all potential substrate peptides) that were detected with the MS/MS analysis, we utilized a stringent dual statistical criteria approach in a similar fashion to Becker L *et al.*<sup>11</sup> which included the log likelihood test (G-test,  $G > 1.5$ ) combined with the 2-tailed  $t$  test ( $\alpha < 0.05$ ). ROTEM results were compared using the one way ANOVA test. All other data were analyzed for statistical significance using the Mann Whitney  $U$ -test.  $P < 0.05$  was considered statistically significant. Unless otherwise specified, all of the data are presented as mean  $\pm$  SEM.



## REFERENCES

1. Lilla JN, Chen CC, Mukai K, BenBarak MJ, Franco CB, Kalesnikoff J, et al. Reduced mast cell and basophil numbers and function in Cpa3-Cre; Mcl-1fl/fl mice. *Blood* 2011; 118:6930-8.
2. Gendrin C, Vornhagen J, Ngo L, Whidbey C, Boldenow E, Santana-Ufret V, et al. Mast cell degranulation by a hemolytic lipid toxin decreases GBS colonization and infection. *Sci Adv* 2015; 1:e1400225.
3. Wada T, Ishiwata K, Koseki H, Ishikura T, Ugajin T, Ohnuma N, et al. Selective ablation of basophils in mice reveals their nonredundant role in acquired immunity against ticks. *J Clin Invest* 2010; 120:2867-75.
4. Tchougounova E, Pejler G, Abrink M. The chymase, mouse mast cell protease 4, constitutes the major chymotrypsin-like activity in peritoneum and ear tissue. A role for mouse mast cell protease 4 in thrombin regulation and fibronectin turnover. *J Exp Med* 2003; 198:423-31.
5. Piliponsky AM, Chen CC, Grimbaldston MA, Burns-Guydish SM, Hardy J, Kalesnikoff J, et al. Mast cell-derived TNF can exacerbate mortality during severe bacterial infections in C57BL/6-KitW-sh/W-sh mice. *Am J Pathol* 2010; 176:926-38.
6. Lauer P, Metzner HJ, Zettlmeissl G, Li M, Smith AG, Lathe R, et al. Targeted inactivation of the mouse locus encoding coagulation factor XIII-A: hemostatic abnormalities in mutant mice and characterization of the coagulation deficit. *Thromb Haemost* 2002; 88:967-74.

7. Malbec O, Roget K, Schiffer C, Iannascoli B, Dumas AR, Arock M, et al. Peritoneal cell-derived mast cells: an in vitro model of mature serosal-type mouse mast cells. *J Immunol* 2007; 178:6465-75.
8. Liu FT, Bohn JW, Ferry EL, Yamamoto H, Molinaro CA, Sherman LA, et al. Monoclonal dinitrophenyl-specific murine IgE antibody: preparation, isolation, and characterization. *J Immunol* 1980; 124:2728-37.
9. UniProt: a hub for protein information. *Nucleic Acids Res* 2015; 43:D204-12.
10. Liu H, Sadygov RG, Yates JR, 3rd. A model for random sampling and estimation of relative protein abundance in shotgun proteomics. *Anal Chem* 2004; 76:4193-201.
11. Becker L, Gharib SA, Irwin AD, Wijsman E, Vaisar T, Oram JF, et al. A macrophage sterol-responsive network linked to atherogenesis. *Cell Metab* 2010; 11:125-35.
12. Eng JK, Jahan TA, Hoopmann MR. Comet: an open-source MS/MS sequence database search tool. *Proteomics* 2013; 13:22-4.
13. Keller A, Nesvizhskii AI, Kolker E, Aebersold R. Empirical statistical model to estimate the accuracy of peptide identifications made by MS/MS and database search. *Anal Chem* 2002; 74:5383-92.
14. MacLean B, Tomazela DM, Shulman N, Chambers M, Finney GL, Frewen B, et al. Skyline: an open source document editor for creating and analyzing targeted proteomics experiments. *Bioinformatics* 2010; 26:966-8.
15. Clauss A. [Rapid physiological coagulation method in determination of fibrinogen]. *Acta Haematol* 1957; 17:237-46.

OR Figure Legends

**Suppl. Fig. 1. Quantification of FXIIIa amounts in BMCMCs.** FXIIIa in BMCMC lysates ( $1 \times 10^5$  cells) and different amounts of FXIIIa were assessed by western blot analysis.

**Suppl. Fig. 2. Effect of diphtheria toxin-mediated basophil depletion on plasma FXIIIa levels in *Mcpt8<sup>DTR</sup>* mice.** Mice were treated i.p. with 500 ng DT 48 h before euthanasia. (A) Western blot analysis and (B) densitometry for FXIIIa plasma levels at baseline in *Mcpt8<sup>+/+</sup>* ( $n = 4$ ) and *Mcpt8<sup>DTR/+</sup>* ( $n = 4$ ) mice.

**Suppl. Fig. 3. Mass spectrometry analysis of mMCP-4 abundance in BMCMC and PCMC releasates.** Wild type mouse PCMCs ( $n = 5$ ) and BMCMCs ( $n = 6$ ) ( $5 \times 10^6$  cells/2.5 ml) were pre-loaded with 2ug/mL anti-IgE-DNP for 24h, and then stimulated with 100ng/mL DNP for 6h. The cell supernatants were collected, concentrated, and subjected to shotgun proteomics. mMCP-4 abundance is expressed in spectral counts.

**Suppl. Fig. 4. FXIIIa mRNA expression levels by wild type (*Mcpt4<sup>+/+</sup>*) and *Mcpt4*-deficient (*Mcpt4<sup>-/-</sup>*) peritoneal-derived mast cells (PCMCs).** PCMCs ( $2.5 \times 10^5$  cells) were sensitized with IgE mAb to DNP (2 mg/ml) overnight at 37 °C and then they were challenged with DNP-HSA (100 ng/ml) for the indicated time points at 37 °C and analyzed by qPCR. The FXIIIa versus GAPDH mRNA expression level for PCMCs that were incubated in media alone was assigned a value of 1.0 for calculation of the corresponding PCMC stimulated by IgE/antigen results. Data were pooled from 3 independent experiments, each of which produced similar results.

**Suppl. Fig. 5. GVP prevents FXIIIa proteolytic degradation by chymase.** (A) Sequence of the endogenous (native) FXIIIa (aa 550-590, spanning the chymase site F574). The synthetic peptide is marked in bold letters within the endogenous sequence, with the cleavage site marked

in green. The chymic-tryptic peptide used to identify this cleavage site and as a diagnostic fragment for efficient cleavage, is underlined. FXIII (0.5ug) was incubated with human skin chymase in the presence or absence of increasing concentrations of GVP (**B**), or with C57BL/6J PCMC lysates (100ng) in the presence and absence of 1000X GVP (**C**) for 6h at 37°C. Amounts of FXIII and its fragments were assessed by western blot analysis. The data are representative of those obtained in two independent experiments, each of which produced similar results.

**Suppl. Fig. 6. mMCP-4 deficiency does not affect fibrinogen plasma levels after CLP.**

Fibrinogen plasma levels at 24 h after CLP in *Mcpt4*<sup>+/+</sup> mice (*n* = 7) and *Mcpt4*<sup>-/-</sup> mice (*n* = 8). Data were pooled from the 3 independent experiments performed, each of which gave similar results.

**Suppl. Fig. 7. Detection of FXIII in mast cells located in nasal polyps.** Immunofluorescence was performed with anti-FXIII (green fluorescence) and anti-tryptase mAb (red fluorescence) antibodies for mast cells located in nasal polyp (right panel). Nuclei were counterstained with DAPI (blue fluorescence). Mast cells expressing both FXIII and tryptase are indicated with white arrows. Negative controls were performed with secondary antibodies only (right panel). Images are representative of five separate subjects.
